# Supplementary material for: Preparation of polysubstituted imidazoles using AC-SO3H/[Urea]7[ZnCl2]2as an efficient catalyst system: a novel method, and α-glucosidase inhibitor activity
Source: Royal Society of Chemistry journal article supplement (doi:10.1039/d3ra00755c), 2023-01-01
Supplement: d3ra00755c1.pdf [file d3ra00755c1.pdf]

## Supporting information

### Preparation of polysubstituted imidazole frames using AC-SO<sub>3</sub>H/[Urea]<sub>7</sub>[ZnCl<sub>2</sub>]<sub>2</sub> as efficient catalysts system: A novel method, and $\alpha$ -glucosidase inhibitors activity

Hai Truong Nguyen,<sup>a,b</sup> Vy Anh Truong,<sup>a,b</sup> and Phuong Hoang Tran<sup>a,b</sup> \*

<sup>a</sup> Department of Organic Chemistry, Faculty of Chemistry, University of Science, Vietnam National University, Ho Chi Minh City 700000, Viet Nam.

<sup>b</sup> Vietnam National University, Ho Chi Minh City 700000, Viet Nam

Email: [thphuong@hcmus.edu.vn](mailto:thphuong@hcmus.edu.vn)

## Table of contents

|                                                                       |                |
|-----------------------------------------------------------------------|----------------|
| <b>Section S1. Chemicals, supplies, and instruments</b>               | <b>S2</b>      |
| <b>Section S2. General procedure</b>                                  | <b>S3-S5</b>   |
| <b>Section S3. Optimization of reaction conditions</b>                | <b>S5-S6</b>   |
| <b>Section S4. Spectral data</b>                                      | <b>S7-S15</b>  |
| <b>Section S5. <sup>1</sup>H, and <sup>13</sup>C NMR spectroscopy</b> | <b>S16-S38</b> |
| <b>Section S6. References</b>                                         | <b>S39-S40</b> |

## Section S1. Chemicals, supplies, and instruments

### Chemicals and supplies

Benzil (98%), nitrobenzene (99%), 2-hydroxybenzaldehyde (99%), 3-hydroxybenzaldehyde (99%), 3-methoxy-4-hydroxybenzaldehyde (99%), 4-hydroxybenzaldehyde (98%), 4-bromobenzaldehyde (99%), 4-(dimethylamino)benzaldehyde (grade ACS reagent, 99%), cyclohexanecarboxaldehyde (97%), 4-nitrophenol (99%), 4-fluorobenzaldehyde (99%), and furfural (99%) were obtained from Sigma-Aldrich. Benzaldehyde (for synthesis), 4-nitrobenzaldehyde (for synthesis), 4-methylbenzaldehyde (for synthesis), 4-methoxybenzaldehyde (for synthesis), ammonium acetate (for synthesis), zinc chloride ( $\text{ZnCl}_2$ ) (for analysis), iron powder, ammonium chloride (for synthesis), ethanol (for synthesis), choline chloride (for synthesis), glycerine (for synthesis), dichloromethane (for synthesis), 1,4-dioxane (for synthesis), sulfonic acid (for synthesis), TLC (silica gel 60 F254), and silica gel 230–400 mesh (for column chromatography) were obtained from Merck. Ethyl acetate (purity  $\geq 99.5\%$ ), *n*-hexane (purity  $\geq 99.5\%$ ), and chloroform (purity  $\geq 99\%$ ) were obtained from Xilong Chemical Co., Ltd (China).  $\alpha$ -Glucosidase (EC 3.2.1.20) from *Saccharomyces cerevisiae* (750 UN) and *p*-nitrophenyl- $\alpha$ -*d*-glucopyranoside were obtained from Sigma Chemical Co. (St. Louis, MO, USA). Acarbose and dimethylsulfoxide were purchased from Merck (Darmstadt, Germany).

### Analytical techniques

Merck silica gel (60, 230-400 mesh) was used in column chromatography. The  $^1\text{H}$  and  $^{13}\text{C}$  NMR spectra were taken using a Bruker Avance 500 MHz. The solvent used was DMSO- $d_6$ , and the internal standards were either TMS or solvent peaks. Calculating boiling points included using the Buchi melting point B-545. A Bruker E400 FT-IR spectrometer was used to measure the Fourier transforms infrared (FT-IR) spectra. ATR-FTIR spectra between 400 and 600  $\text{cm}^{-1}$ . The Q-500 thermal gravimetric analyzer was used to measure TGA, with a temperature ramp of 5  $^\circ\text{C}/\text{min}$  and airflow. On a Bruker D8 Advance, powder X-ray diffraction (P-XRD) data were obtained using Ni-filtered Cu K ( $\lambda = 1.54059$ ) radiation. Using the Hitachi S-4800 scanning electron microscope and the XZS-107T digital microscope connected to NHV-CAM via the program eScope, the materials' morphology was examined (SEM). The Quantachrome NOVA 3200e system was used to quantify the  $\text{N}_2$  isotherm at 77 K. To ascertain the elemental composition of sorbents, energy-dispersive X-ray spectroscopy (EDX) examination was performed utilizing an EMAX energy EX-400 EDX instrument.

## Section S2. General procedure

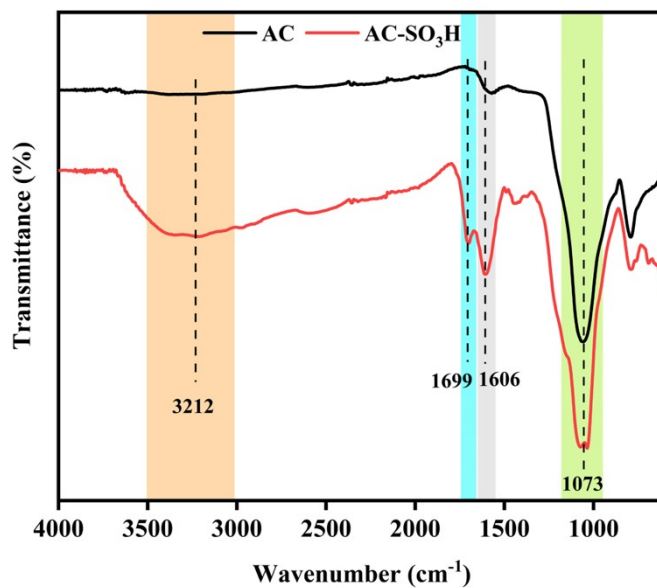

**Fig. S1.** FT-IR spectrum of AC and AC-SO<sub>3</sub>H.

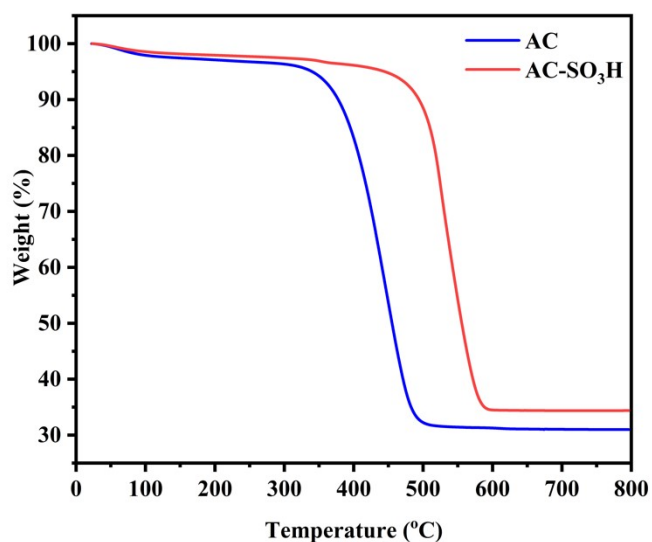

**Fig. S2.** TGA of AC and AC-SO<sub>3</sub>H.

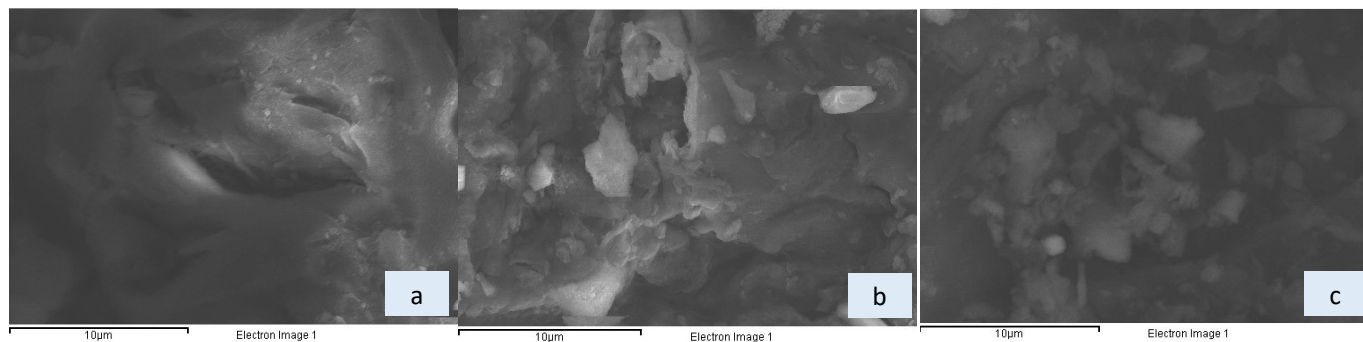

**Fig. S3.** SEM image of AC, AC-SO<sub>3</sub>H, and AC-SO<sub>3</sub>H (after 4 times).

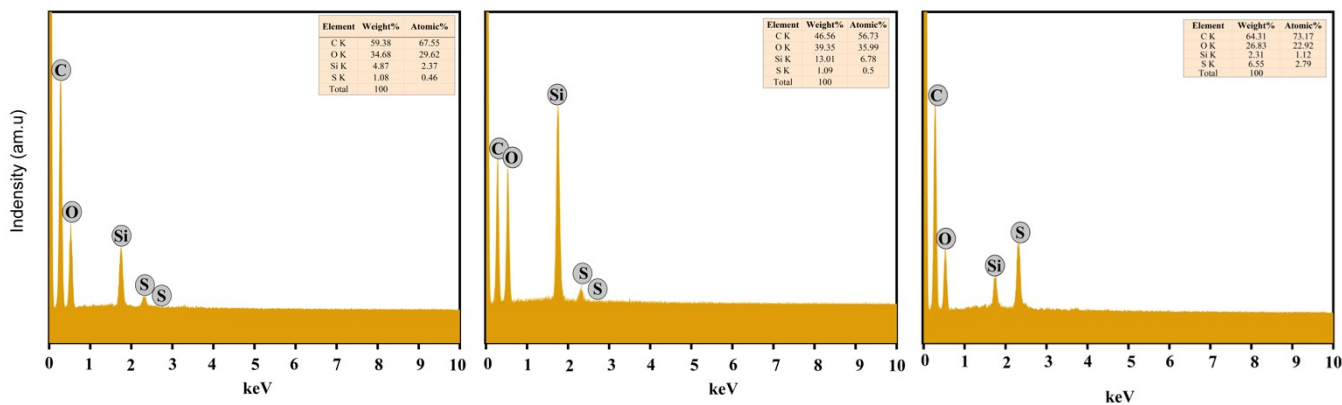

**Fig. S4.** EDX analysis of AC, AC-SO<sub>3</sub>H, and AC-SO<sub>3</sub>H (after 4 times).

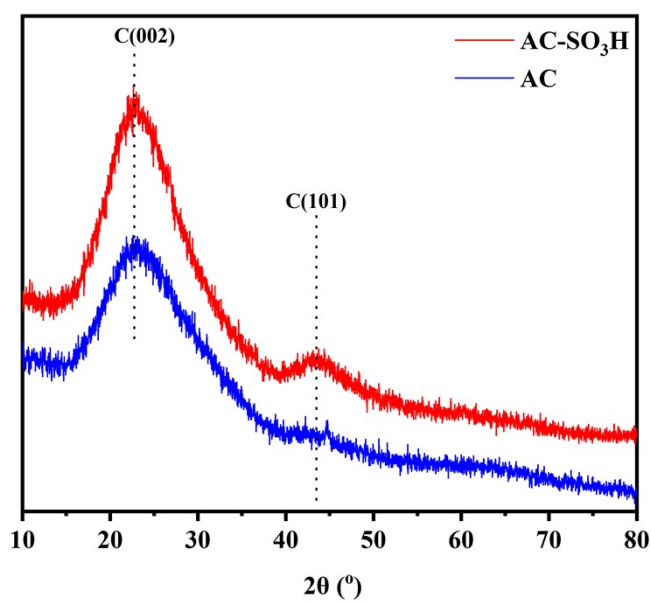

**Fig. S5.** P-XRD analysis of AC and AC-SO<sub>3</sub>H.

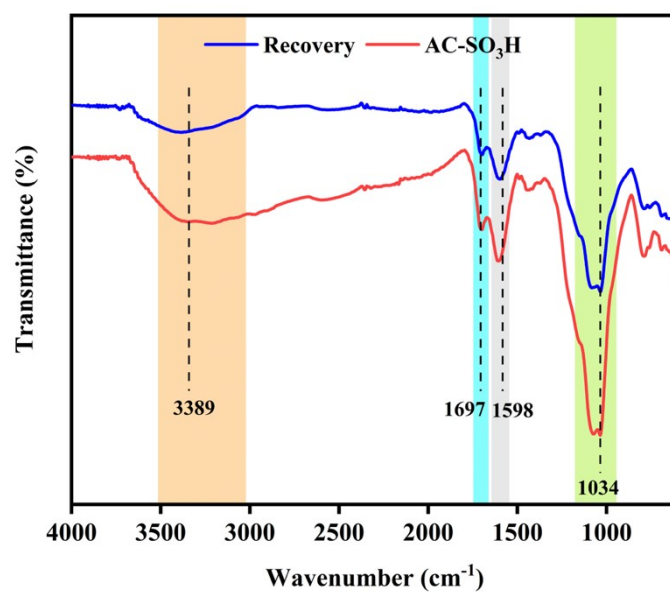

**Fig. S6.** FT-IR of AC-SO<sub>3</sub>H and AC-SO<sub>3</sub>H (after 4 times).

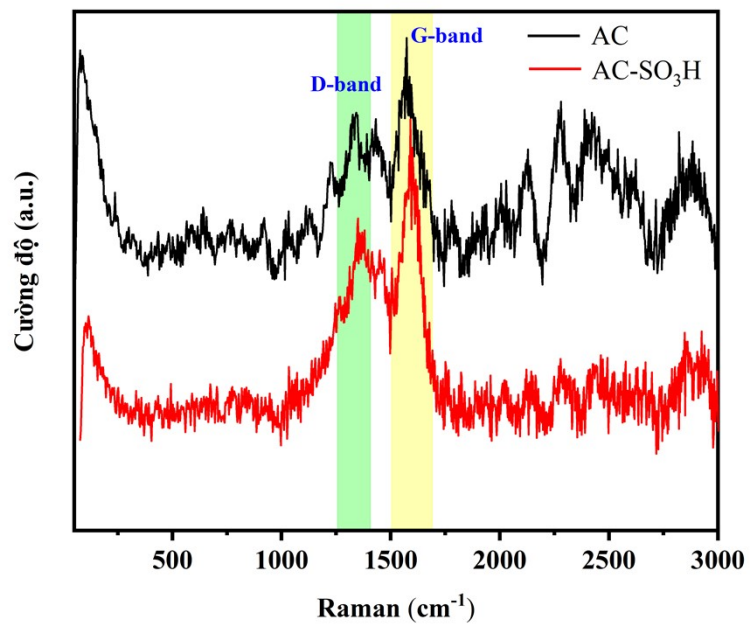

**Fig. S7.** Raman of AC and AC-SO<sub>3</sub>H

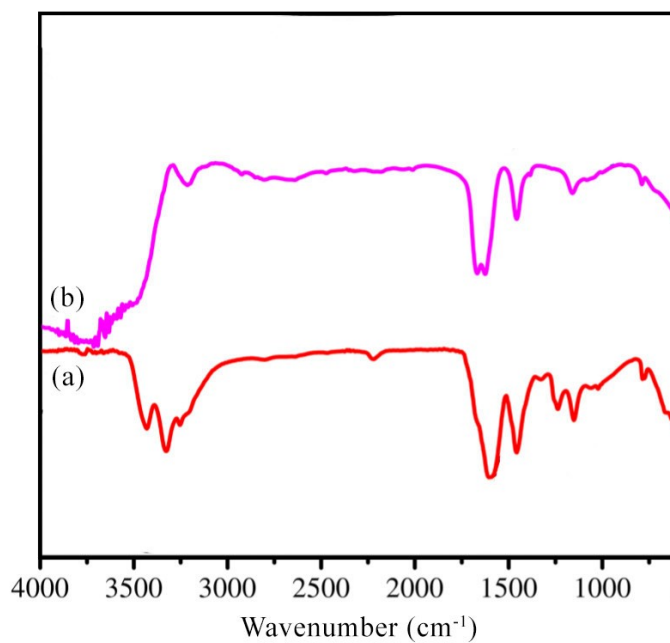

**Fig. S8.** FT-IR of [Urea]<sub>7</sub>[ZnCl<sub>2</sub>]<sub>2</sub> (a), and Urea (b).

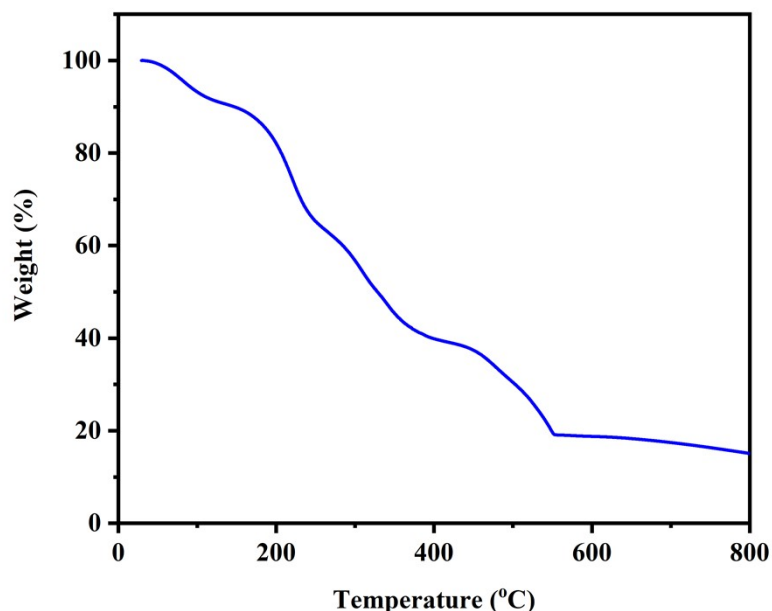

**Fig. S9.** TGA of [Urea]<sub>7</sub>[ZnCl<sub>2</sub>]<sub>2</sub>

### Section S3. Optimization of reaction conditions

**Table S1.** Optimization of the conversion of nitrobenzene to aniline.<sup>a</sup>

| Entry | Temperature (°C) | Time (min) | Conversion <sup>b</sup> (%) |
|-------|------------------|------------|-----------------------------|
| 1     | 30 (RT)          | 60         | 79.41                       |
| 2     | 60               | 60         | 100.00                      |
| 3     | 60               | 15         | 60.04                       |
| 4     | 60               | 30         | 81.81                       |
| 5     | 60               | 45         | 89.85                       |

<sup>a</sup>Reaction conditions: Nitrobenzene (1.0 mmol, 123 mg), ammonium chloride (1.5 mmol, 79.5 mg), and iron powder (3.0 mmol, 168 mg) under H<sub>2</sub>O/EtOH (v/v = 1:1).

<sup>b</sup>Conversion was recorded by GCMS.

**Table S2.** Optimization of reaction conditions.<sup>a</sup>

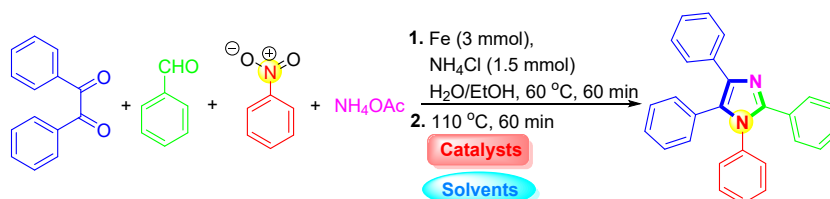

| Entry | Temperature (°C) | Time (min) | Catalyst loading (mg) | Yields <sup>b</sup> (%) | TON | TOF (h <sup>-1</sup> ) |
|-------|------------------|------------|-----------------------|-------------------------|-----|------------------------|
| 1     | 80               | 60         | 10                    | 20                      | 63  | 63                     |

|          |            |           |           |           |            |            |
|----------|------------|-----------|-----------|-----------|------------|------------|
| 2        | 100        | 60        | 10        | 46        | 144        | 144        |
| <b>3</b> | <b>110</b> | <b>60</b> | <b>10</b> | <b>73</b> | <b>228</b> | <b>228</b> |
| 4        | 130        | 60        | 10        | 75        | 234        | 234        |
| 5        | 110        | 30        | 10        | 36        | 113        | 113        |
| 6        | 110        | 90        | 10        | 74        | 231        | 231        |
| 7        | 110        | 60        | 0         | 43        | 134        | 134        |
| 8        | 110        | 60        | 1         | 44        | 138        | 138        |
| 9        | 110        | 60        | 3         | 51        | 159        | 159        |
| 10       | 110        | 60        | 5         | 64        | 200        | 200        |
| 11       | 110        | 60        | 15        | 61        | 191        | 191        |

---

<sup>a</sup>Reaction conditions: Nitrobenzene (1.0 mmol, 123 mg), ammonium chloride (1.5 mmol, 79.5 mg), and iron powder (3.0 mmol, 168 mg) under H<sub>2</sub>O/EtOH (v/v = 1:1) at 60 °C for 60 min. Then, benzil (1.0 mmol, 210 mg), benzaldehyde (1.0 mmol, 106 mg), ammonium acetate (1.0 mmol, 77 mg), AC-SO<sub>3</sub>H (mg), and [Urea]<sub>7</sub>[ZnCl<sub>2</sub>]<sub>2</sub> (1.0 mmol).

<sup>b</sup>Yields were recorded by isolated yield.

## Section S4. Spectral data

### 1,2,4,5-Tetraphenyl-1*H*-imidazole (IMI-01)<sup>1,2</sup>

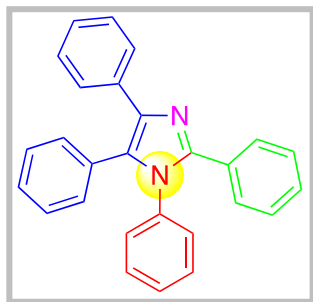

White solid, m.p = 213-217 °C

<sup>1</sup>H NMR (500 MHz, CDCl<sub>3</sub>) δ (ppm) 7.60 (dd, *J* = 8.5 Hz, 1.5 Hz, 2H), 7.43 (dd, *J* = 8.0, 1.5 Hz, 2H), 7.28–7.26 (m, 2H), 7.25–7.17 (m, 10H), 7.13 (dd, *J* = 8.0 Hz, 1.5 Hz, 2H), 7.04 (dt, *J* = 6.5 Hz, 1.5 Hz, 2H).

<sup>13</sup>C NMR (125 MHz, CDCl<sub>3</sub>) δ (ppm) 147.3, 138.7, 137.6, 134.9, 131.5, 131.3, 131.1, 131.0, 129.4, 129.4, 128.9, 128.7, 128.6, 128.6, 128.5, 128.5, 128.3, 127.8, 127.0.

LC-MS *m/z* [M+H]<sup>+</sup> 373

### 2-(2-Hydroxyphenyl)-1,4,5-triphenyl-1*H*-imidazole (IMI-02)<sup>1,3</sup>

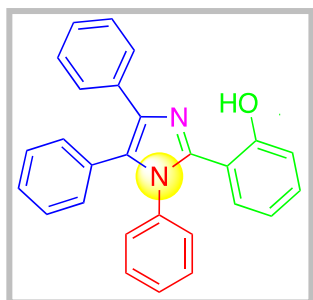

White solid, m.p = 250-254 °C

<sup>1</sup>H NMR (500 MHz, DMSO-*d*<sub>6</sub>) δ (ppm) 12.57 (s, 1H), 7.45-7.26 (m, 16H), 6.94 (dd, *J* = 8.0 Hz, 1.0 Hz, 1H), 6.66 (dd, *J* = 8.0, 1.5, 1H), 6.55 (ddd, *J* = 8.0 Hz, 7.0 Hz, 1.0 Hz, 1H).

<sup>13</sup>C NMR (125 MHz, DMSO-*d*<sub>6</sub>) δ (ppm) 157.3, 144.4, 136.6, 134.4, 133.2, 131.3, 130.8, 130.2, 129.6, 129.4, 129.3, 128.7, 128.7, 128.5, 128.4, 126.9, 126.8, 126.1, 118.1, 116.9, 113.9.

LC-MS *m/z* [M+H]<sup>+</sup> 389

### 2-(3-Hydroxyphenyl)-1,4,5-triphenyl-1*H*-imidazole (IMI-03)<sup>4</sup>

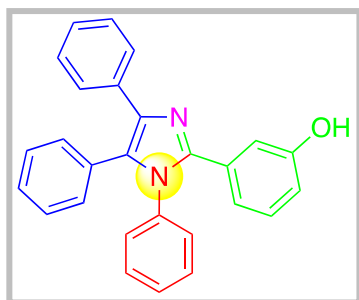

White solid, m.p = 202-205 °C



<sup>1</sup>H NMR (500 MHz, DMSO-*d*<sub>6</sub>) δ (ppm) 9.47 (s, 1H), 7.48 (d, *J* = 7.0 Hz, 2H), 7.33-7.28 (m, 6H), 7.25–7.23 (m, 6H), 7.18–7.15 (m, 1H), 7.02 (t, *J* = 8.0 Hz, 1H), 6.95–6.94 (m, 1H), 6.71–6.65 (m, 1H).

<sup>13</sup>C NMR (125 MHz, DMSO-*d*<sub>6</sub>) δ (ppm) 157.1, 146.1, 136.7, 136.7, 134.4, 131.5, 131.2, 131.2, 130.4, 129.1, 129.1, 128.7, 128.4, 128.4, 128.2, 126.4, 126.3, 118.9, 115.4, 115.4.

LC-MS *m/z* [M+H]<sup>+</sup> 389

#### 2-(4-Hydroxy-3-methoxyphenyl)-1,4,5-triphenyl-1*H*-imidazole (IMI-04)<sup>5</sup>

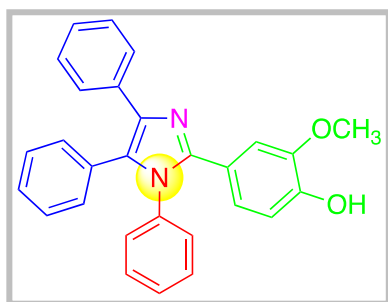

White solid, m.p = 209-210 °C

<sup>1</sup>H NMR (500 MHz, CDCl<sub>3</sub>) δ (ppm) 7.52–7.50 (m, 2H), 7.19–7.17 (m, 3H), 7.16–7.12 (m, 6H), 7.03 (dd, *J* = 8.0 Hz, 1.0 Hz, 2H), 6.95 (m, 3H), 6.76 (dd, *J* = 8.0 Hz, 2.0 Hz, 1H), 6.65 (d, *J* = 8.0 Hz, 1H), 5.65 (s, 1H), 3.61 (s, 1H).

<sup>13</sup>C NMR (125 MHz, CDCl<sub>3</sub>) δ (ppm) 146.9, 146.1, 146.0, 138.0, 137.4, 134.5, 131.2, 130.8, 130.5, 129.1, 128.6, 128.3, 128.2, 128.1, 127.9, 127.4, 126.6, 122.7, 122.5, 114.1, 111.8, 55.8.

LC-MS *m/z* [M+H]<sup>+</sup> 419

#### 2-(4-Nitrophenyl)-1,4,5-triphenyl-1*H*-imidazole (IMI-05)<sup>1, 6</sup>

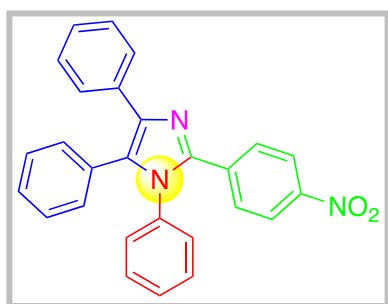

Orange solid, m.p = 194-198 °C

<sup>1</sup>H NMR (500 MHz, DMSO-*d*<sub>6</sub>) δ (ppm) 8.15 (d, *J* = 8.5 Hz, 2H), 7.62 (d, *J* = 8.5 Hz, 2H), 7.51 (d, *J* = 7.5 Hz, 2H), 7.39-7.27 (m, 12H), 7.21 (t, *J* = 7.5 Hz, 1H).

<sup>13</sup>C NMR (125 MHz, DMSO-*d*<sub>6</sub>) δ (ppm) 146.7, 143.8, 137.8, 136.3, 136.2, 133.9, 132.8, 131.1, 129.9, 129.5, 129.3, 128.8, 128.7, 128.6, 128.5, 128.3, 126.8, 126.4, 123.5.

LC-MS *m/z* [M+H]<sup>+</sup> 418

#### 2-(4-Hydroxyphenyl)-1,4,5-triphenyl-1*H*-imidazole (IMI-06)<sup>7</sup>

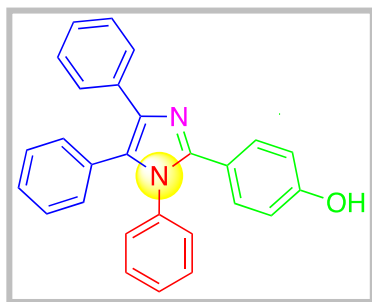

White solid, m.p = 280-283 °C

$^1\text{H NMR}$  (500 MHz,  $\text{DMSO-}d_6$ )  $\delta$  (ppm) 9.67 (s, 1H), 7.47- 7.22 (m, 17H), 6.65 (s, 2H)

$^{13}\text{C NMR}$  (125 MHz,  $\text{DMSO-}d_6$ )  $\delta$  (ppm) 157.6, 146.4, 136.9, 136.4, 134.6, 131.1, 130.6, 130.6, 129.8, 129.1, 128.8, 128.6, 128.4, 128.3, 128.1, 126.3, 121.3, 114.9.

LC-MS  $m/z$   $[\text{M}+\text{H}]^+$  389

### 2-(4-Bromophenyl)-1,4,5-triphenyl-1H-imidazole (IMI-07)<sup>8</sup>

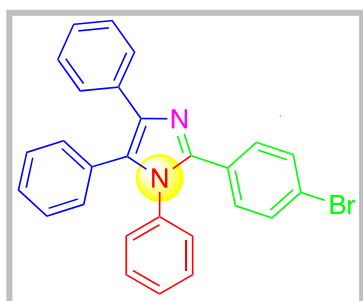

White solid, m.p = 165-168 °C

$^1\text{H NMR}$  (500 MHz,  $\text{DMSO-}d_6$ )  $\delta$  (ppm) 7.50–7.47 (m, 4H), 7.34–7. 23 (m, 15H).

$^{13}\text{C NMR}$  (125 MHz,  $\text{DMSO-}d_6$ )  $\delta$  (ppm) 157.9, 145.5, 137.3, 134.9, 132.4, 131.6, 131.6, 130.9, 130.4, 130.2, 128.9, 128.8, 128.6, 128.0, 126.9, 126.8, 122.2, 116.2.

LC-MS  $m/z$   $[\text{M}+\text{H}]^+$  451

### 2-(4-*N,N*-dimethylaminophenyl)-1,4,5-triphenyl-1H-imidazole (IMI-08)

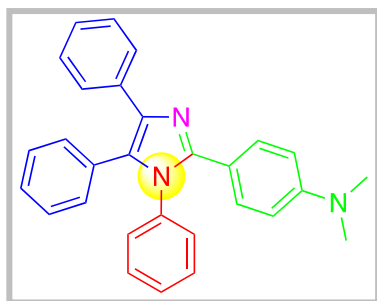

White solid, m.p =207-209 °C

$^1\text{H NMR}$  (500 MHz,  $\text{DMSO-}d_6$ )  $\delta$  (ppm) 7.47 (d,  $J = 7.5$  Hz, 2H), 7.33-7.27 (m, 7H), 7.23-7.17 (m, 8H), 6.57 (d,  $J = 8.5$  Hz, 2H), 2.88 (s, 6H).

<sup>13</sup>C NMR (125 MHz, DMSO-*d*<sub>6</sub>)  $\delta$  (ppm) 149.9, 146.7, 137.1, 136.3, 134.7, 131.2, 130.7, 130.4, 129.1, 129.0, 128.8, 128.5, 128.4, 128.2, 128.1, 126.3, 126.2, 117.7, 111.3.

LC-MS  $m/z$  [M+H]<sup>+</sup> 416

### 2-(4-Methylphenyl)-1,4,5-triphenyl-1*H*-imidazole (IMI-09)<sup>6</sup>

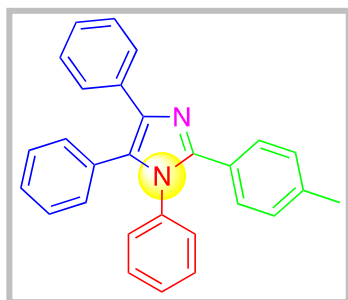

White solid, m.p = 187-190 °C

<sup>1</sup>H NMR (500 MHz, DMSO-*d*<sub>6</sub>)  $\delta$  (ppm) 7.50–7.47 (m, 2H), 7.33 – 7.28 (m, 6H), 7.27-7.22 (m, 9H), 7.09–7.08 (d,  $J$  = 8.0 Hz, 2H), 2.26 (s, 3H).

<sup>13</sup>C NMR (125 MHz, DMSO-*d*<sub>6</sub>)  $\delta$  (ppm) 146.1, 137.8, 136.7, 136.7, 134.5, 131.1, 131.1, 130.5, 129.1, 128.8, 128.7, 128.7, 128.4, 128.4, 128.2, 128.1, 127.6, 126.4, 126.4, 20.7.

LC-MS  $m/z$  [M+H]<sup>+</sup> 387

### 2-Cyclohexyl-1,4,5-triphenyl-1*H*-imidazole (IMI-10)

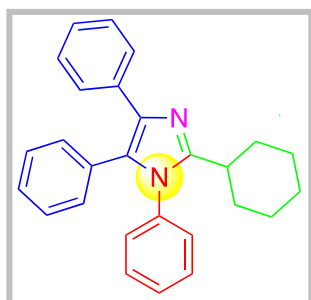

White solid, m.p = 185-186 °C

<sup>1</sup>H NMR (500 MHz, DMSO-*d*<sub>6</sub>)  $\delta$  (ppm) 7.54 (d,  $J$  = 8.5, 2H), 7.34 (m, 3H), 7.22 (t,  $J$  = 8, 2H), 7.11 (m, 8H), 2.50 (m, 1H), 1.86 (m, 3H), 1.78 (m, 3H), 1.64 (d,  $J$  = 13, 1H), 1.24 (m, 1H), 1.16 (m, 2H).

<sup>13</sup>C NMR (125 MHz, DMSO-*d*<sub>6</sub>)  $\delta$  (ppm) 157.7, 152.9, 135.6, 135.5, 131.6, 131.3, 130.0, 129.5, 128.8, 128.3, 128.3, 127.5, 126.7, 126.4, 116.0, 35.9, 32.2, 26.2, 25.9.

LC-MS  $m/z$  [M+H]<sup>+</sup> 379

### 2-(Furan-2-yl)-1,4,5-triphenyl-1*H*-imidazole (IMI-11)<sup>9</sup>

White solid, m.p = 165-167 °C

<sup>1</sup>H NMR (500 MHz, DMSO-*d*<sub>6</sub>)  $\delta$  (ppm) 7.66–7.64 (m, 7H), 7.37–7.31 (m, 10H).

<sup>13</sup>C NMR (125 MHz, DMSO-*d*<sub>6</sub>) δ (ppm) 148.43, 138.51, 129.90, 128.60, 128.23, 126.59, 126.49.

LC-MS *m/z* [M+H]<sup>+</sup> 363

**1-(4-Hydroxyphenyl)-2,4,5-triphenyl-1*H*-imidazole (IMI-12)<sup>10-12</sup>**

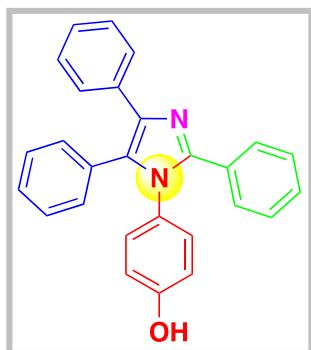

Dark reddish brown solid, m.p = 186-187 °C

<sup>1</sup>H NMR (500 MHz, DMSO-*d*<sub>6</sub>) δ (ppm) 9.74 (s, 1H), 7.48 (d, *J* = 8.5 Hz, 2H), 7.44–7.42 (m, 2H), 7.30 (m, 6H), 7.24 (m, 4H), 7.16 (m, 1H), 7.04 (d, *J* = 8.5 Hz, 2H), 6.65 (d, *J* = 8.5 Hz, 2H).

<sup>13</sup>C NMR (125 MHz, DMSO-*d*<sub>6</sub>) δ (ppm) 157.8, 146.6, 137.1, 135.0, 132.1, 131.6, 131.1, 131.1, 130.3, 128.9, 128.7, 128.6, 128.6, 128.3, 126.8, 116.1.

LC-MS *m/z* [M+H]<sup>+</sup> 389

**1-(4-Hydroxyphenyl)-2-(4-hydroxyl-3-methoxyphenyl)-4,5-diphenyl-1*H*-imidazole (IMI-13)**

5, 10, 13

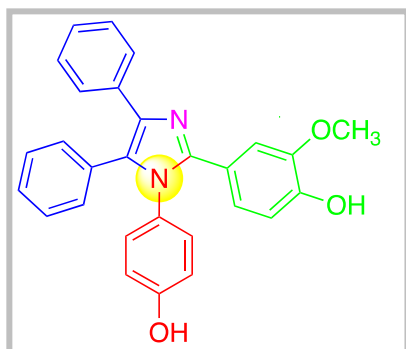

Light brown solid, m.p = 188-189 °C

<sup>1</sup>H NMR (500 MHz, DMSO-*d*<sub>6</sub>) δ (ppm) 9.72 (s, 1H), 9.22 (s, 1H), 7.46 (d, *J* = 8.5, 2H), 7.28 (m, 3H), 7.20 (m, 4H), 7.14 (m, 1H), 7.02 (d, *J* = 8.5, 2H), 6.88 (m, 2H), 6.76 (m, 3H), 3.54 (s, 3H).

<sup>13</sup>C NMR (125 MHz, DMSO-*d*<sub>6</sub>) δ (ppm) 157.7, 147.3, 147.3, 146.9, 136.6, 135.2, 131.6, 131.4, 131.3, 130.4, 128.9, 128.6, 128.6, 128.5, 126.8, 126.7, 122.2, 121.8, 116.0, 115.6, 112.8, 55.7.

LC-MS *m/z* [M+H]<sup>+</sup> 435

**1-(4-Hydroxyphenyl)-2-(4-nitrophenyl)-4,5-diphenyl-1*H*-imidazole (IMI-14)<sup>10, 14</sup>**

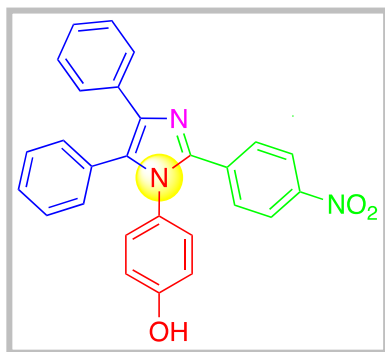

Reddish brown solid, m.p = 174-176 °C

<sup>1</sup>H NMR (500 MHz, DMSO-*d*<sub>6</sub>) δ (ppm) 9.85 (s, 1H), 8.18 (d, *J* = 8.5, 2H), 7.69 (d, *J* = 8.5, 2H), 7.50 (d, *J* = 7.5, 2H), 7.33 (m, 3H), 7.26 (m, 4H), 7.20 (m, 1H), 7.13 (d, *J* = 8, 2H), 6.70 (d, *J* = 8.5, 2H).

<sup>13</sup>C NMR (125 MHz, DMSO-*d*<sub>6</sub>) δ (ppm) 158.2, 147.1, 144.4, 138.1, 137.0, 134.5, 133.6, 131.6, 130.6, 130.2, 129.1, 129.1, 129.0, 128.7, 127.8, 127.2, 126.9, 124.0, 116.4.

LC-MS *m/z* [M+H]<sup>+</sup> 434

**1,2-(4-Hydroxyphenyl)-4,5-diphenyl-1H-imidazole (IMI-15)**<sup>10, 15, 16</sup>

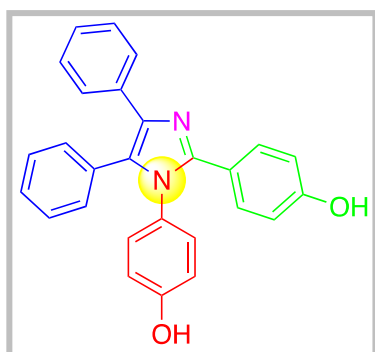

Red solid, m.p = 141-143 °C

<sup>1</sup>H NMR (500 MHz, DMSO-*d*<sub>6</sub>) δ (ppm) 9.73-9.66 (d, 2H), 7.48 (d, *J* = 8, 2H), 7.30 (m, 3H), 7.23 (m, 6H), 7.15 (m, 1H), 7.02 (d, *J* = 8, 2H), 6.67 (m, 4H).

<sup>13</sup>C NMR (125 MHz, DMSO-*d*<sub>6</sub>) δ (ppm) 158.0, 157.6, 147.0, 136.6, 135.2, 131.6, 131.3, 130.3, 130.1, 128.8, 128.6, 128.5, 126.8, 126.7, 122.0, 116.0, 115.4.

LC-MS *m/z* [M+H]<sup>+</sup> 405

**1-(4-Hydroxyphenyl)-2-(4-methylphenyl)-4,5-diphenyl-1H-imidazole (IMI-16)**<sup>10, 17-19</sup>

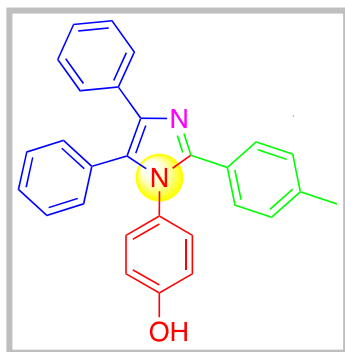

Reddish brown solid, m.p = 192-194 °C

$^1\text{H NMR}$  (500 MHz,  $\text{DMSO-}d_6$ )  $\delta$  (ppm) 9.73 (s, 1H), 7.48 (d,  $J = 8$ , 2H), 7.32 (m, 5H), 7.24 (m, 4H), 7.17 (m, 1H), 7.11 (d,  $J = 7.5$ , 2H), 7.04 (d,  $J = 8.5$ , 2H), 6.66 (d,  $J = 8.5$ , 2H), 2.28 (s, 3H).

$^{13}\text{C NMR}$  (125 MHz,  $\text{DMSO-}d_6$ )  $\delta$  (ppm) 157.7, 146.7, 138.1, 136.9, 135.1, 131.8, 131.6, 131.2, 130.3, 129.2, 128.8, 128.7, 128.6, 128.4, 128.3, 126.8, 126.8, 116.0, 21.2.

LC-MS  $m/z$   $[\text{M}+\text{H}]^+$  403

### 1-(4-Hydroxyphenyl)-2-(4-bromophenyl)-4,5-diphenyl-1H-imidazole (IMI-17)<sup>10</sup>

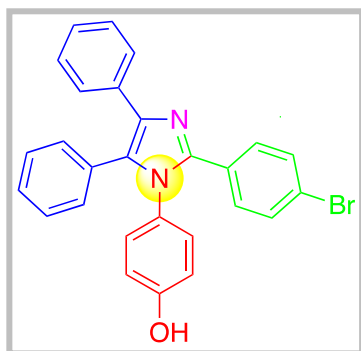

Pink solid, m.p = 129-130 °C

$^1\text{H NMR}$  (500 MHz,  $\text{DMSO-}d_6$ )  $\delta$  (ppm) 9.78 (s, 1H), 7.53 (d,  $J = 8.5$ , 2H), 7.48 (d,  $J = 8.5$ , 2H), 7.36 (d,  $J = 8.5$ , 2H), 7.32 (m, 3H), 7.25 (m, 4H), 7.18 (m, 1H), 7.07 (d,  $J = 8.5$ , 2H), 6.68 (d,  $J = 8.5$ , 2H).

$^{13}\text{C NMR}$  (125 MHz,  $\text{DMSO-}d_6$ )  $\delta$  (ppm) 157.7, 145.3, 137.1, 134.7, 132.2, 131.5, 131.4, 130.7, 130.3, 130.0, 130.0, 128.7, 128.7, 128.4, 127.9, 126.7, 126.6, 122.0, 116.0.

LC-MS  $m/z$   $[\text{M}+\text{H}]^+$  467

### 1-(4-Hydroxyphenyl)-2-(4-fluorophenyl)-4,5-diphenyl-1H-imidazole (IMI-18)<sup>14</sup>

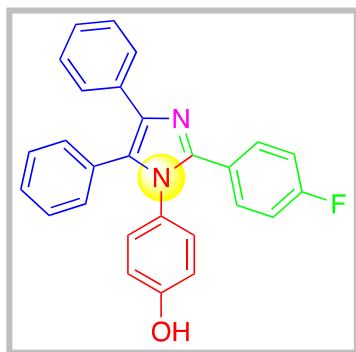

White solid, m.p = 125-126 °C

$^1\text{H NMR}$  (500 MHz,  $\text{DMSO-}d_6$ )  $\delta$  (ppm) 9.76 (s, 1H), 7.47 (m, 4H), 7.32 (m, 3H), 7.24 (m, 4H), 7.32 (m, 3H), 7.24 (m, 4H), 7.17 (m, 3H), 7.06 (d,  $J = 8.5$ , 2H), 6.68 (d,  $J = 8.5$ , 2H).

$^{13}\text{C NMR}$  (125 MHz,  $\text{DMSO-}d_6$ )  $\delta$  (ppm) 163.3, 161.4, 157.8, 145.7, 137.0, 135.0, 132.0, 131.6, 131.0, 130.8, 130.7, 130.3, 128.9, 128.8, 128.6, 128.1, 127.6, 126.8, 116.1, 115.7, 115.5.

LC-MS  $m/z$   $[\text{M}+\text{H}]^+$  407

**1-(4-Hydroxyphenyl)-2-(4-methoxyphenyl)-4,5-diphenyl-1H-imidazole (IMI-19)<sup>10, 11</sup>**

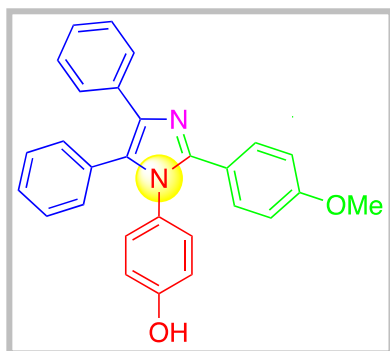

Light yellow solid, m.p = 190-191 °C

$^1\text{H NMR}$  (500 MHz,  $\text{DMSO-}d_6$ )  $\delta$  (ppm) 9.73 (s, 1H), 7.48 (d,  $J = 8.5$ , 2H), 7.36 (d,  $J = 8$ , 2H), 7.31 (m, 3H), 7.23 (m, 4H), 7.16 (m, 1H), 7.04 (d,  $J = 8.5$ , 2H), 6.68 (m, 2H), 6.73 (m, 2H), 3.75 (s, 3H).

$^{13}\text{C NMR}$  (125 MHz,  $\text{DMSO-}d_6$ )  $\delta$  (ppm) 159.6, 157.7, 146.6, 136.8, 135.2, 131.6, 131.3, 130.3, 130.0, 129.0, 128.8, 128.6, 128.5, 128.5, 127.4, 126.8, 126.7, 123.5, 116.1, 114.1, 55.6.

LC-MS  $m/z$   $[\text{M}+\text{H}]^+$  419

**1-(4-Hydroxyphenyl)-2-(4-(dimethylamino)phenyl)-4,5-diphenyl-1H-imidazole (IMI-20)<sup>16</sup>**

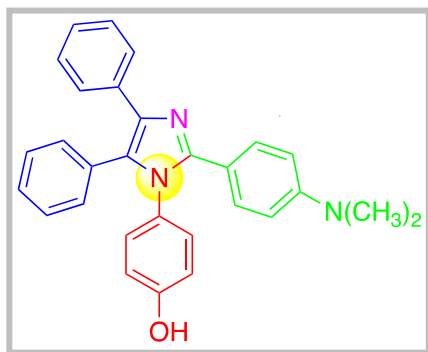

Brown solid, m.p = 179-181 °C

$^1\text{H NMR}$  (500 MHz,  $\text{DMSO-}d_6$ )  $\delta$  (ppm) 10.16 (s, 1H), 7.91 (d,  $J = 7.5$ , 2H), 7.73 (m, 2H), 7.67 (m, 6H), 7.58 (m, 1H), 7.46 (d,  $J = 8.5$ , 2H), 7.11 (d,  $J = 8$ , 2H), 7.04 (d,  $J = 8.5$ , 2H), 3.79 (s, 6H).

$^{13}\text{C NMR}$  (125 MHz,  $\text{DMSO-}d_6$ )  $\delta$  (ppm) 157.6, 150.4, 147.3, 136.6, 135.3, 131.6, 131.5, 131.2, 130.3, 129.4, 128.8, 128.5, 126.8, 126.6, 118.5, 116.1, 111.9.

LC-MS  $m/z$   $[\text{M}+\text{H}]^+$  432

### 2-Cyclohexyl-1-(4-hydroxyphenyl)-4,5-triphenyl-1H-imidazole (IMI-21)

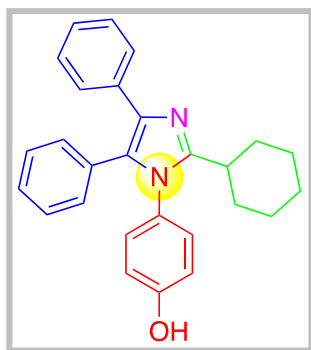

White solid, m.p = 160-161 °C

$^1\text{H NMR}$  (500 MHz,  $\text{DMSO-}d_6$ )  $\delta$  (ppm) 9.74 (s, 1H), 7.42 (d,  $J = 8$ , 2H), 7.26 (m, 3H), 7.20 (t,  $J = 7.5$ , 2H), 7.16 (m, 2H), 7.12 (m, 1H), 7.08 (d,  $J = 8.5$ , 2H), 6.73 (d,  $J = 8.5$ , 2H), 2.40 (m, 1H), 1.81 (d,  $J = 12$ , 2H), 1.74 (m, 2H), 1.62 (m, 3H), 1.18 (m, 1H), 1.13 (m, 2H).

$^{13}\text{C NMR}$  (125 MHz,  $\text{DMSO-}d_6$ )  $\delta$  (ppm) 157.7, 152.8, 135.6, 135.5, 131.6, 131.3, 130.0, 129.5, 128.8, 128.4, 128.3, 127.5, 126.7, 126.4, 126.0, 35.9, 32.2, 26.2, 25.9.

HRMS (ESI):  $m/z$   $[\text{M}+\text{H}]^+$  calcd for  $\text{C}_{27}\text{H}_{27}\text{N}_2\text{O}^+$ : 395.2123; found: 295.2132.



## Section S5. $^1\text{H}$ , $^{13}\text{C}$ NMR, and HRMS spectroscopy

### $^1\text{H}$ , $^{13}\text{C}$ NMR spectrum of 1,2,4,5-Tetraphenyl-1*H*-imidazole (IMI-01)

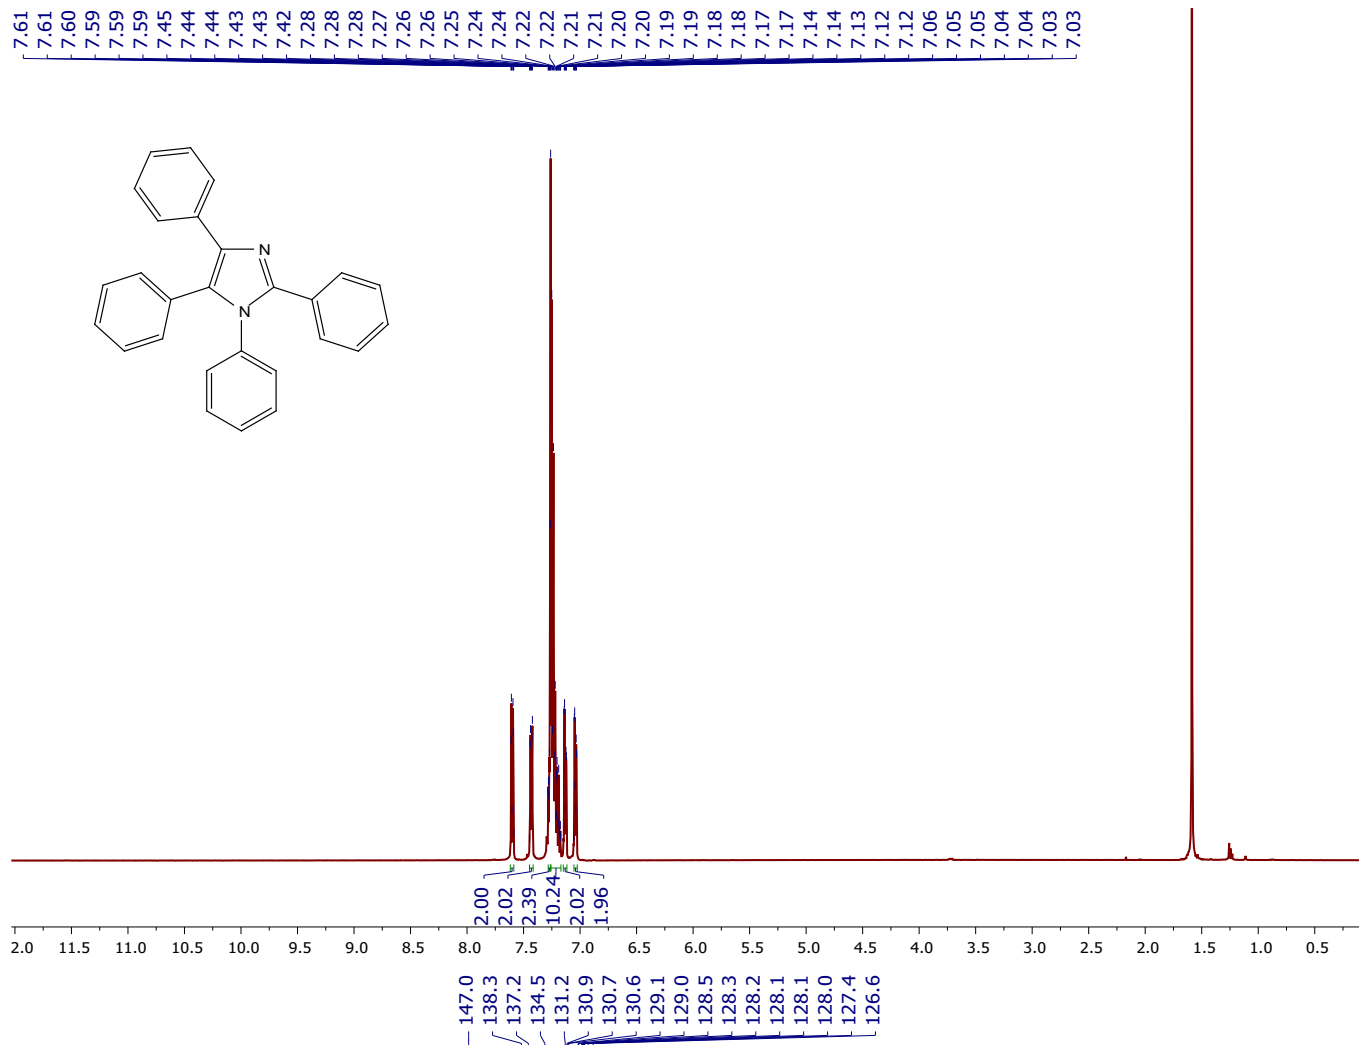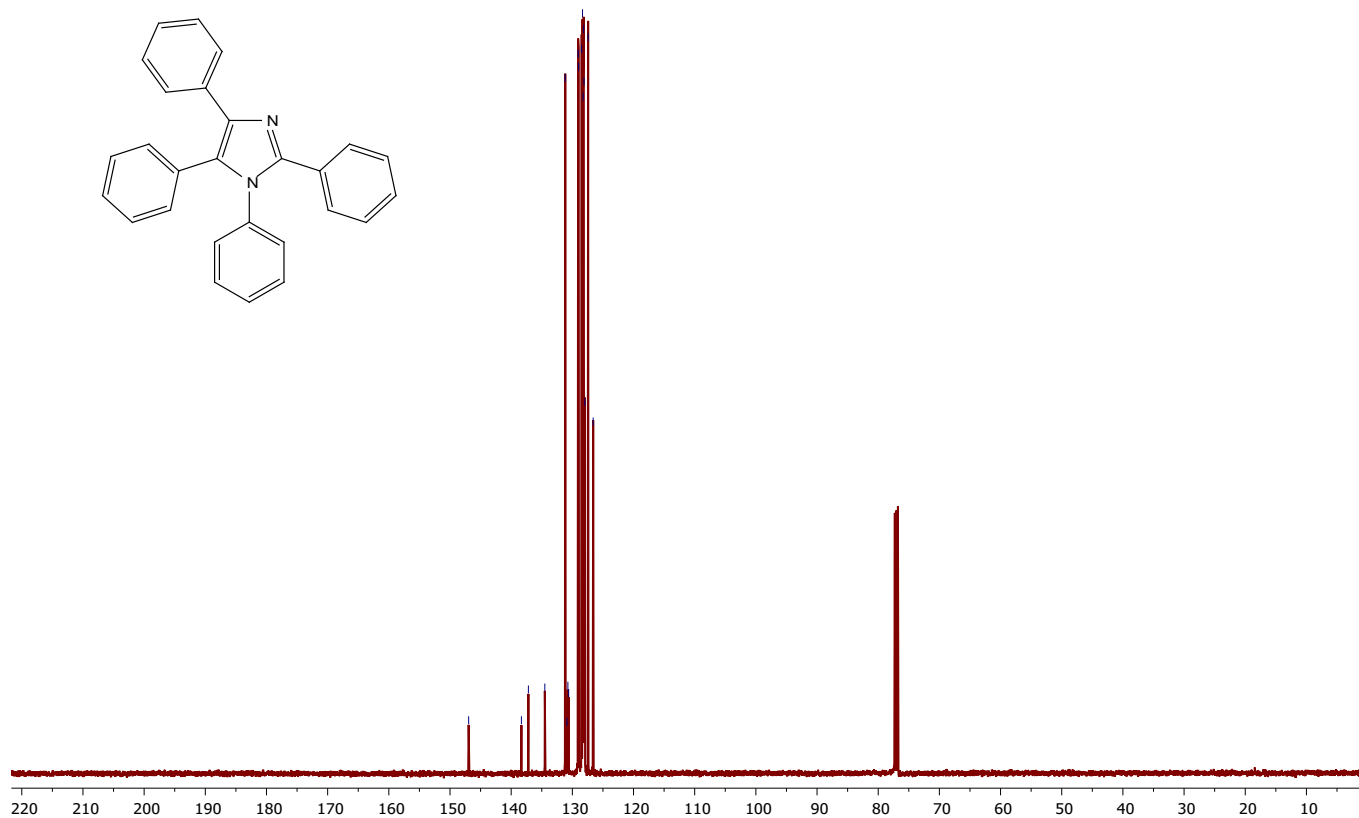

$^1\text{H}$ ,  $^{13}\text{C}$  NMR spectrum of 2-(2-Hydroxyphenyl)-1,4,5-triphenyl-1*H*-imidazole (IMI-02)

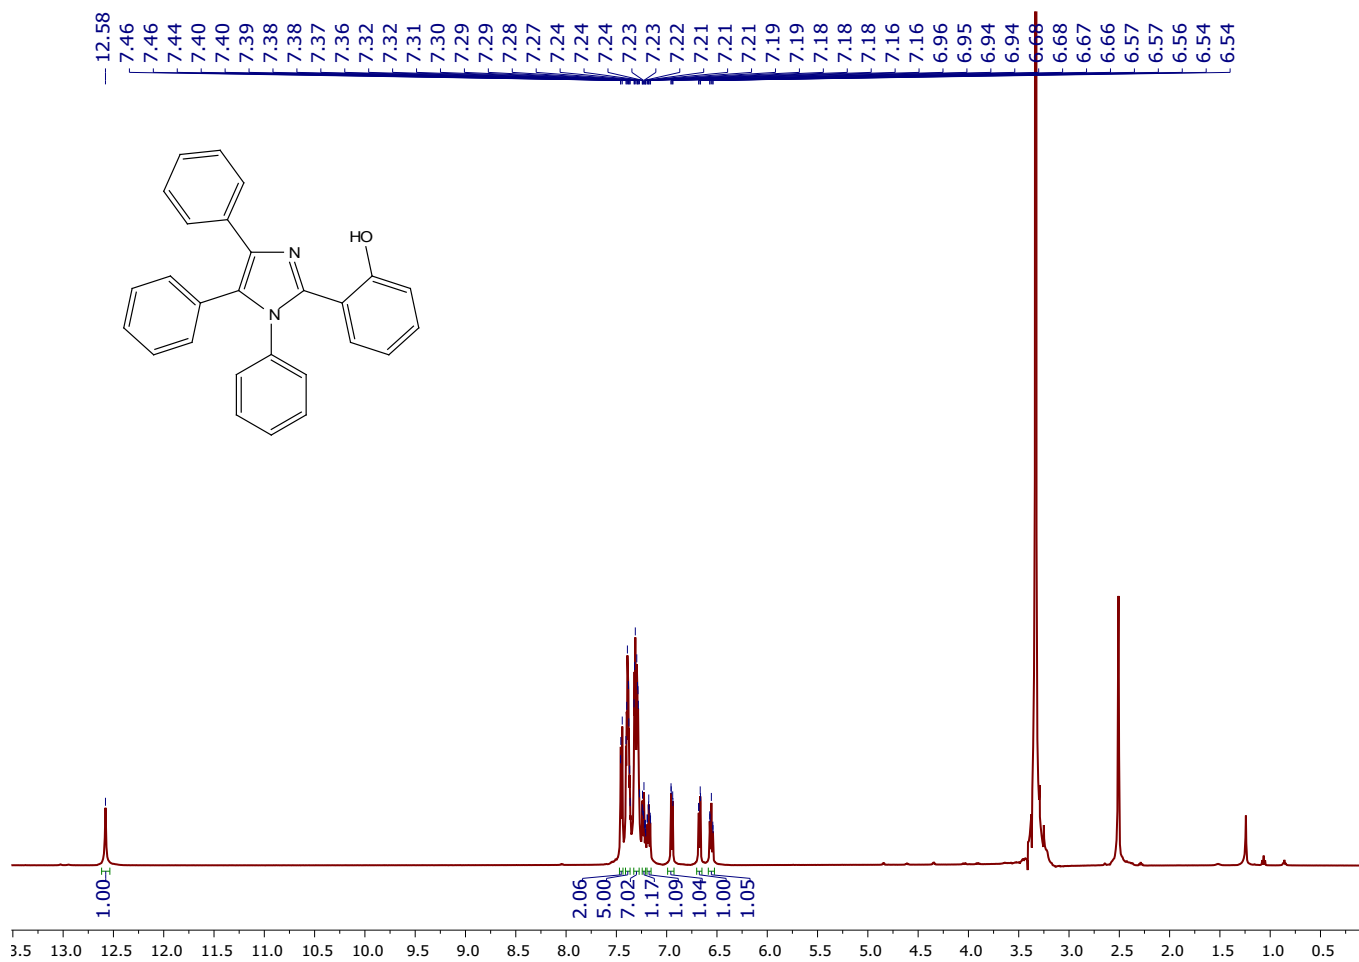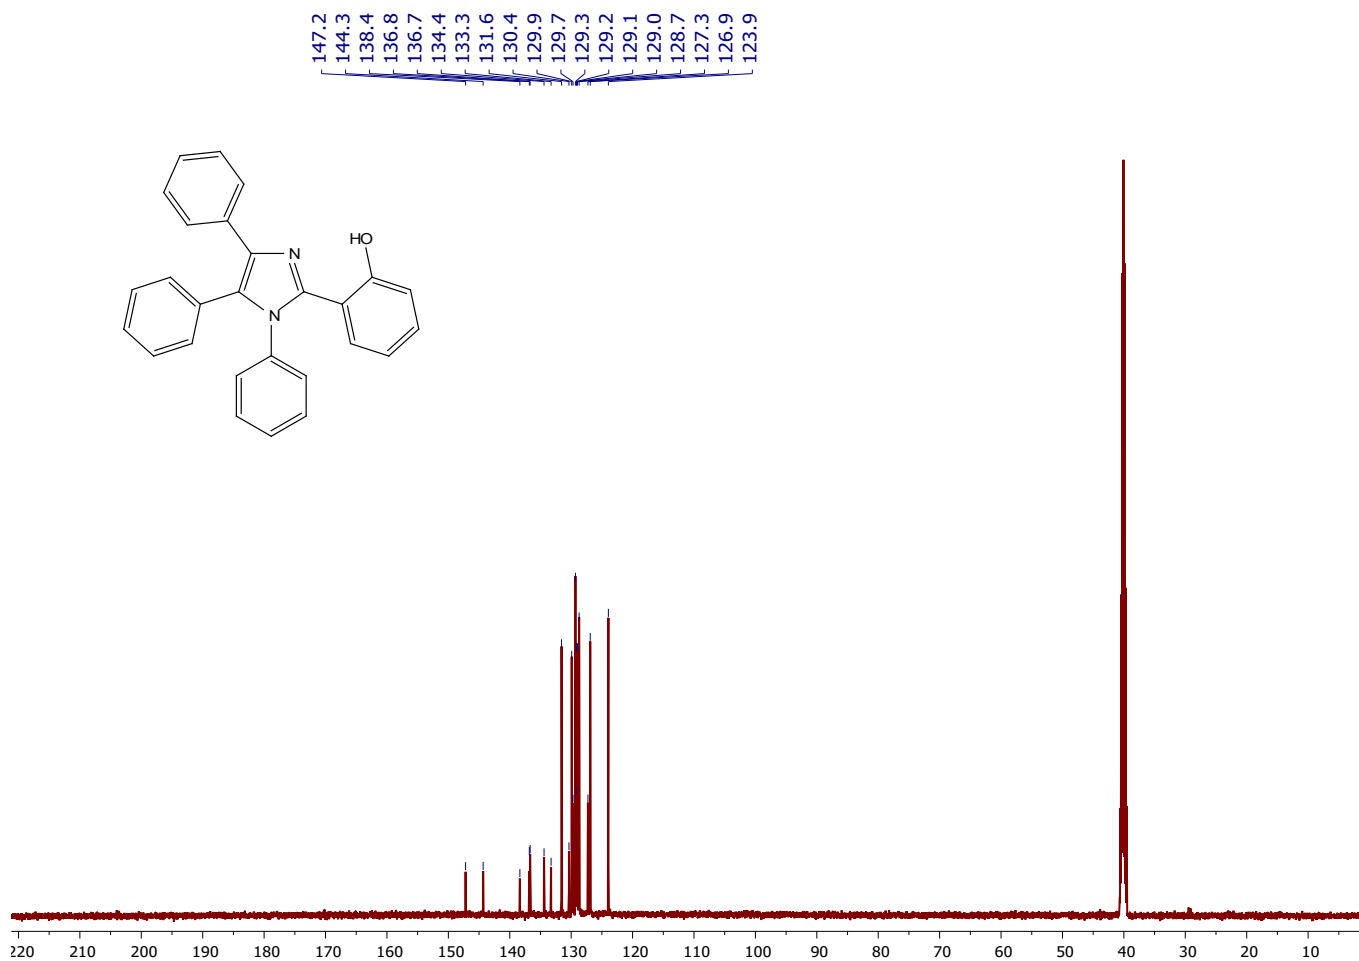

<sup>1</sup>H, <sup>13</sup>C NMR spectrum of 2-(3-Hydroxyphenyl)-1,4,5-triphenyl-1H-imidazole (IMI-03)

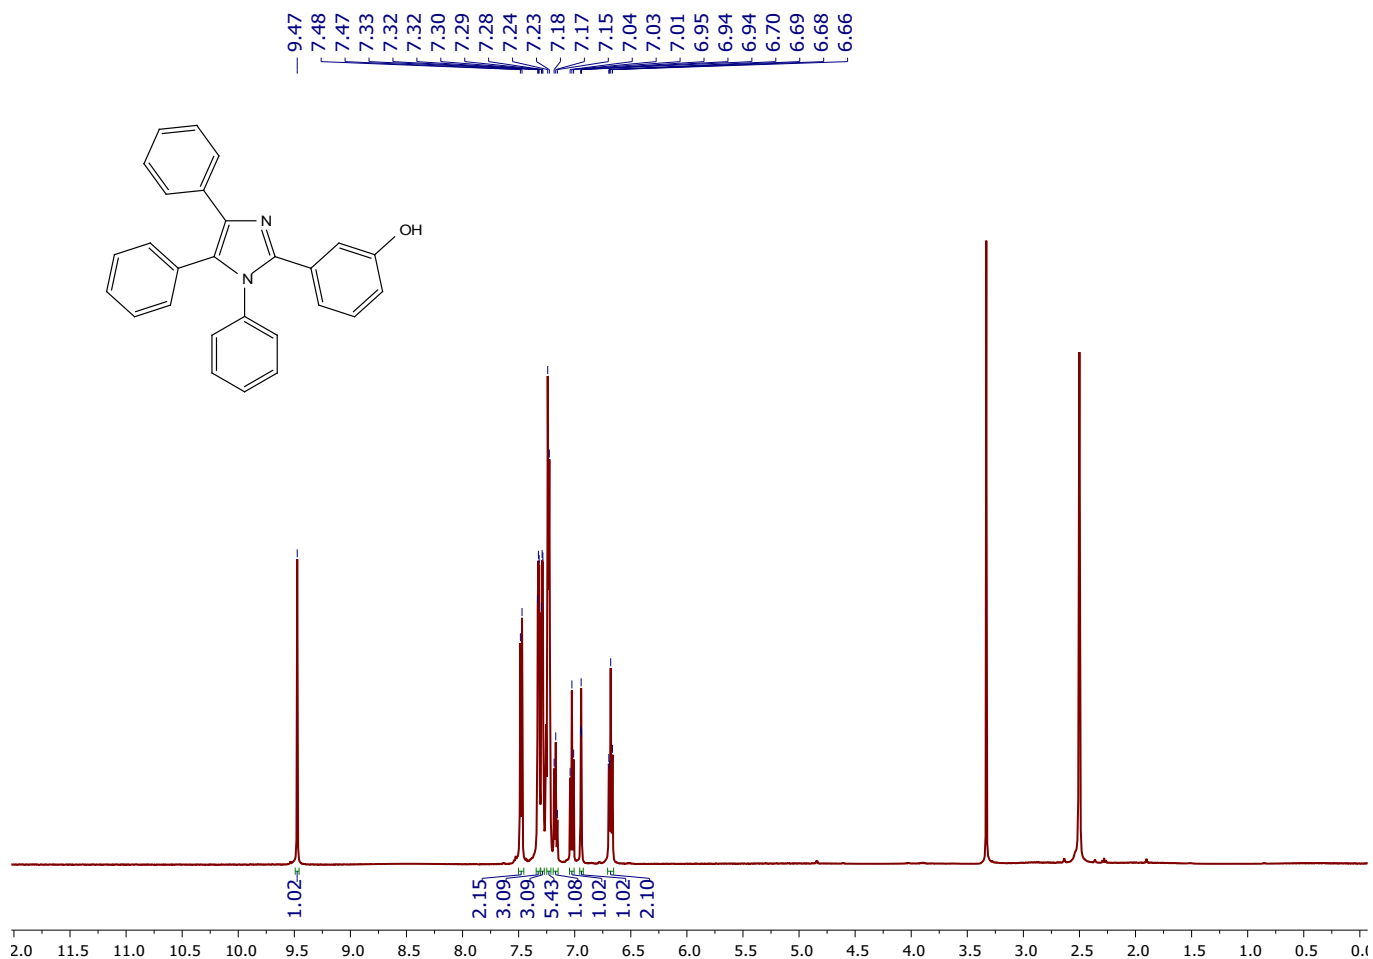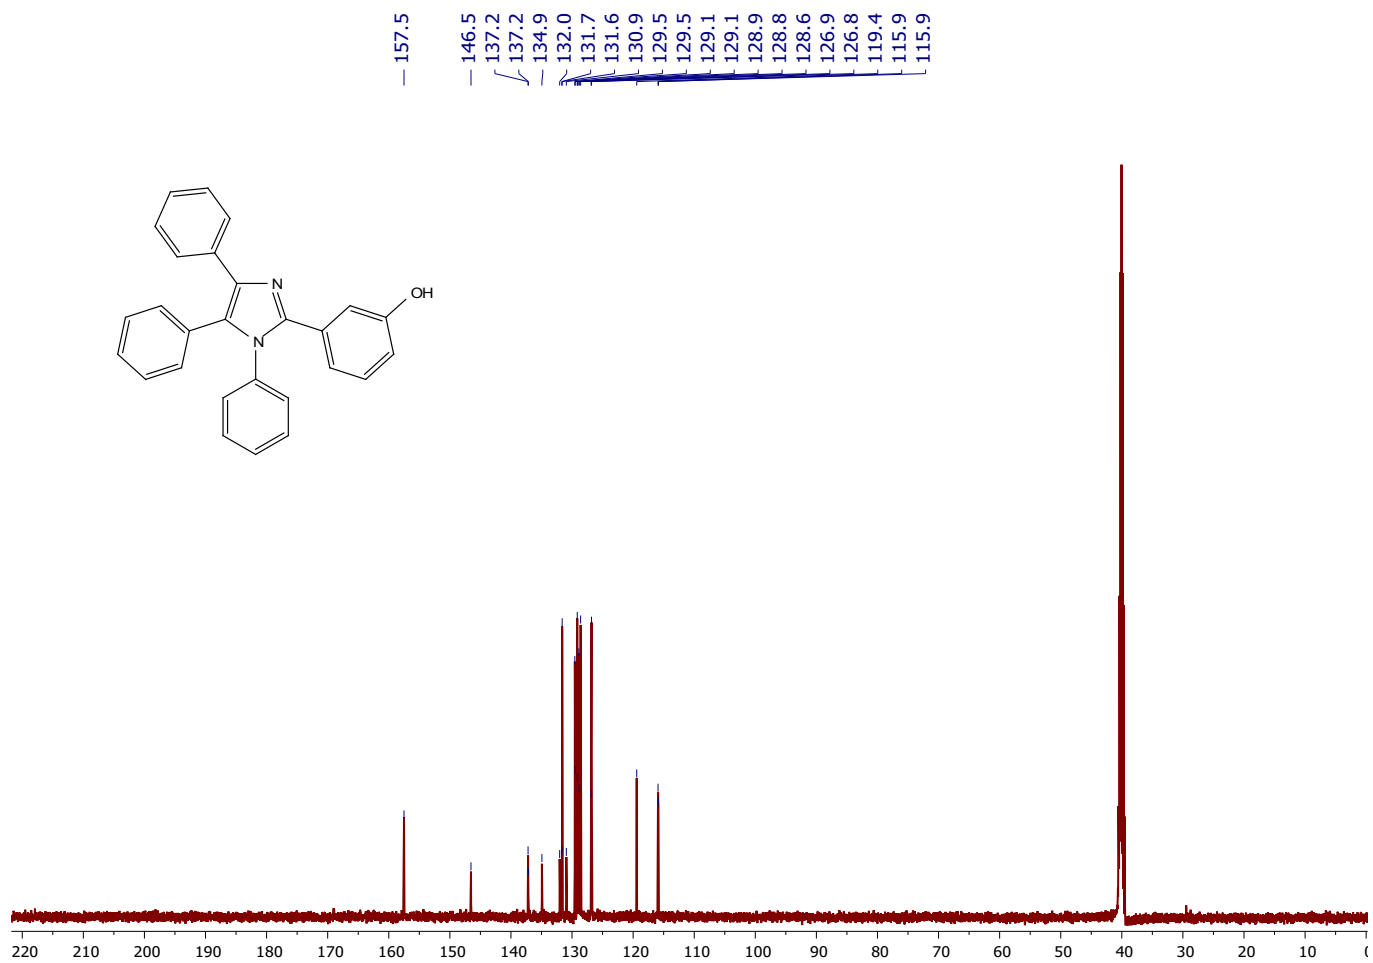

<sup>1</sup>H, <sup>13</sup>C NMR spectrum of 2-(4-Hydroxy-3-methoxyphenyl)-1,4,5-triphenyl-1H-imidazole (IMI-04)

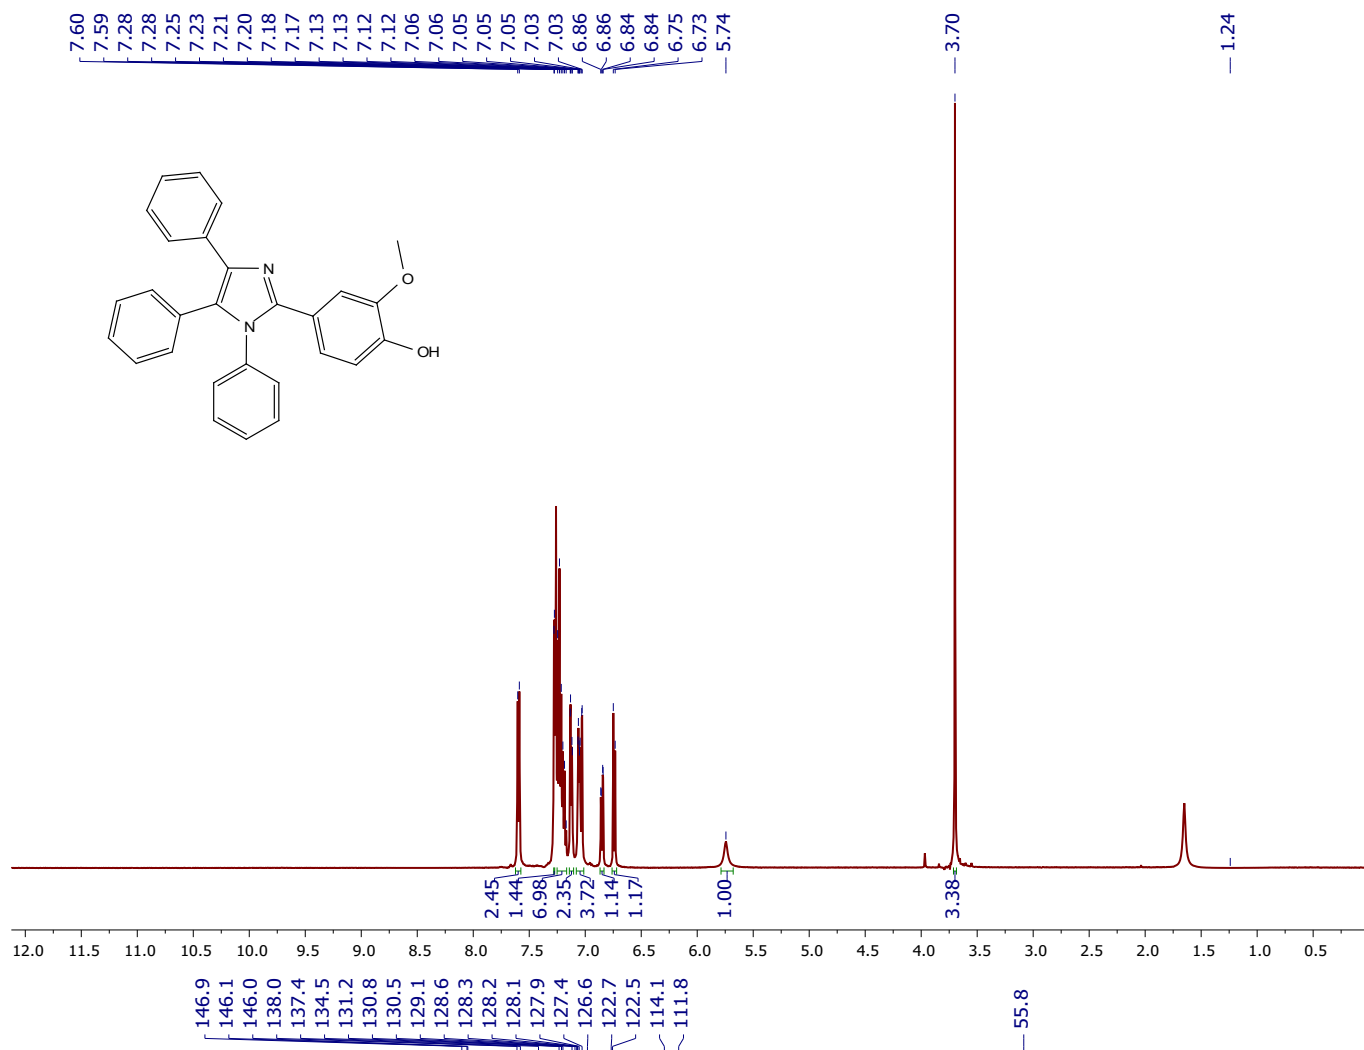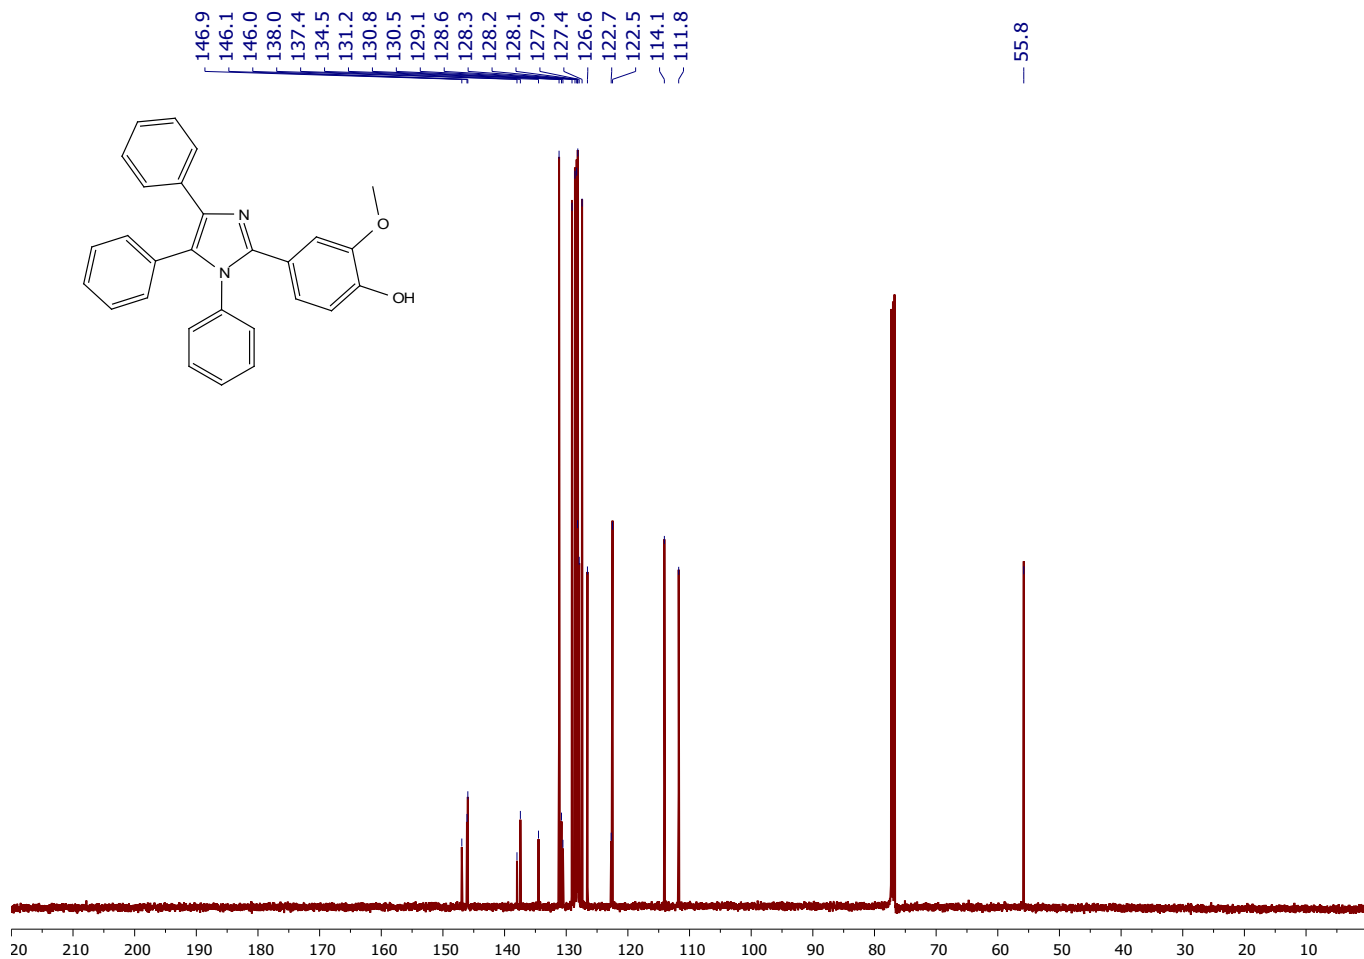

# <sup>1</sup>H, <sup>13</sup>C NMR spectrum of 2-(4-Nitrophenyl)-1,4,5-triphenyl-1H-imidazole (IMI-05)

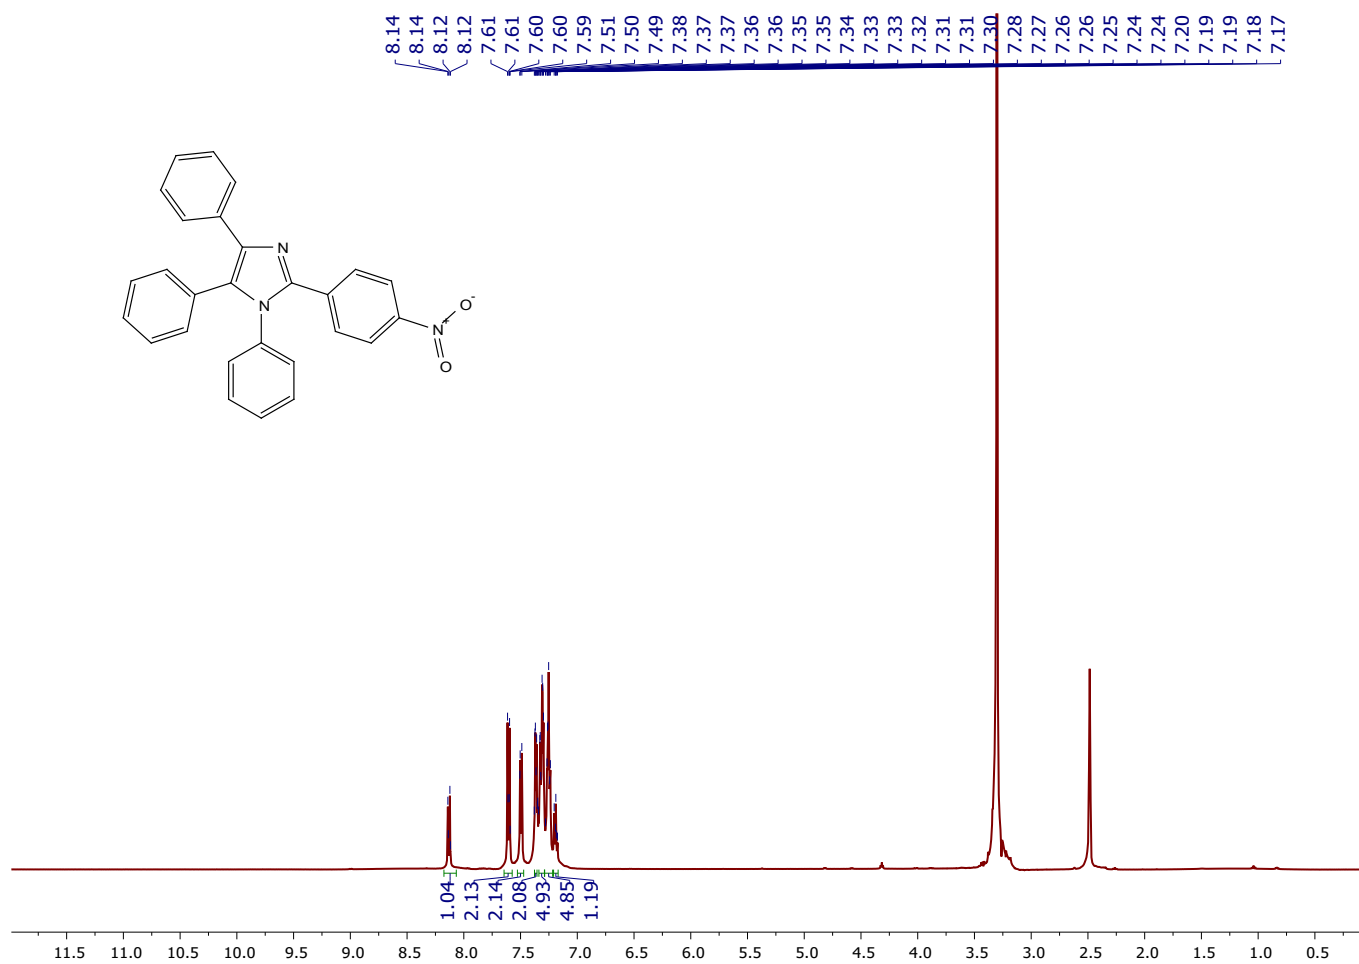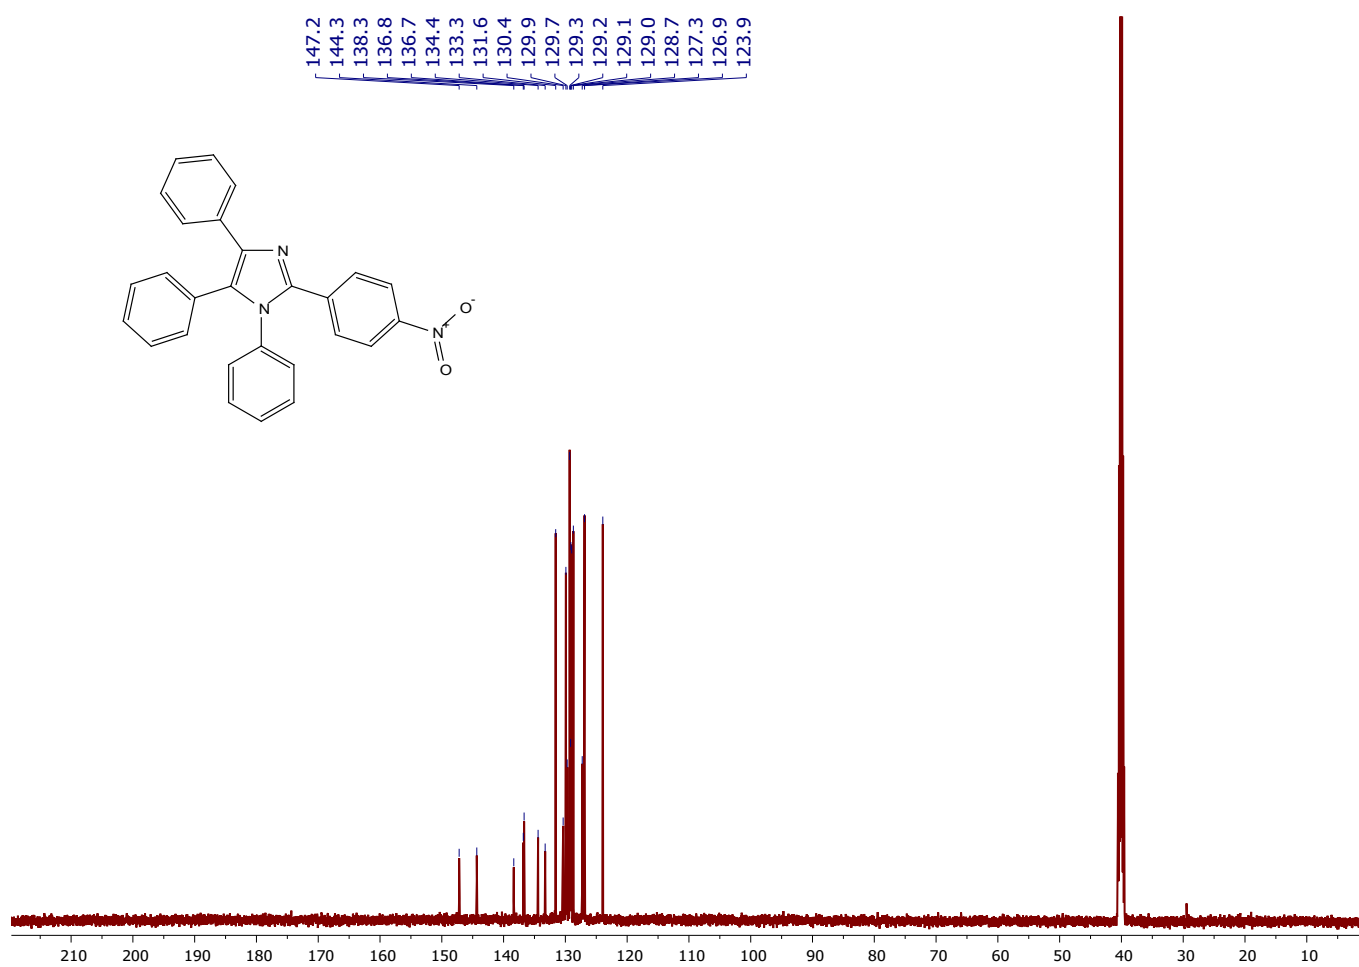

$^1\text{H}$ ,  $^{13}\text{C}$  NMR spectrum of 2-(4-Hydroxyphenyl)-1,4,5-triphenyl-1*H*-imidazole (IMI-06)

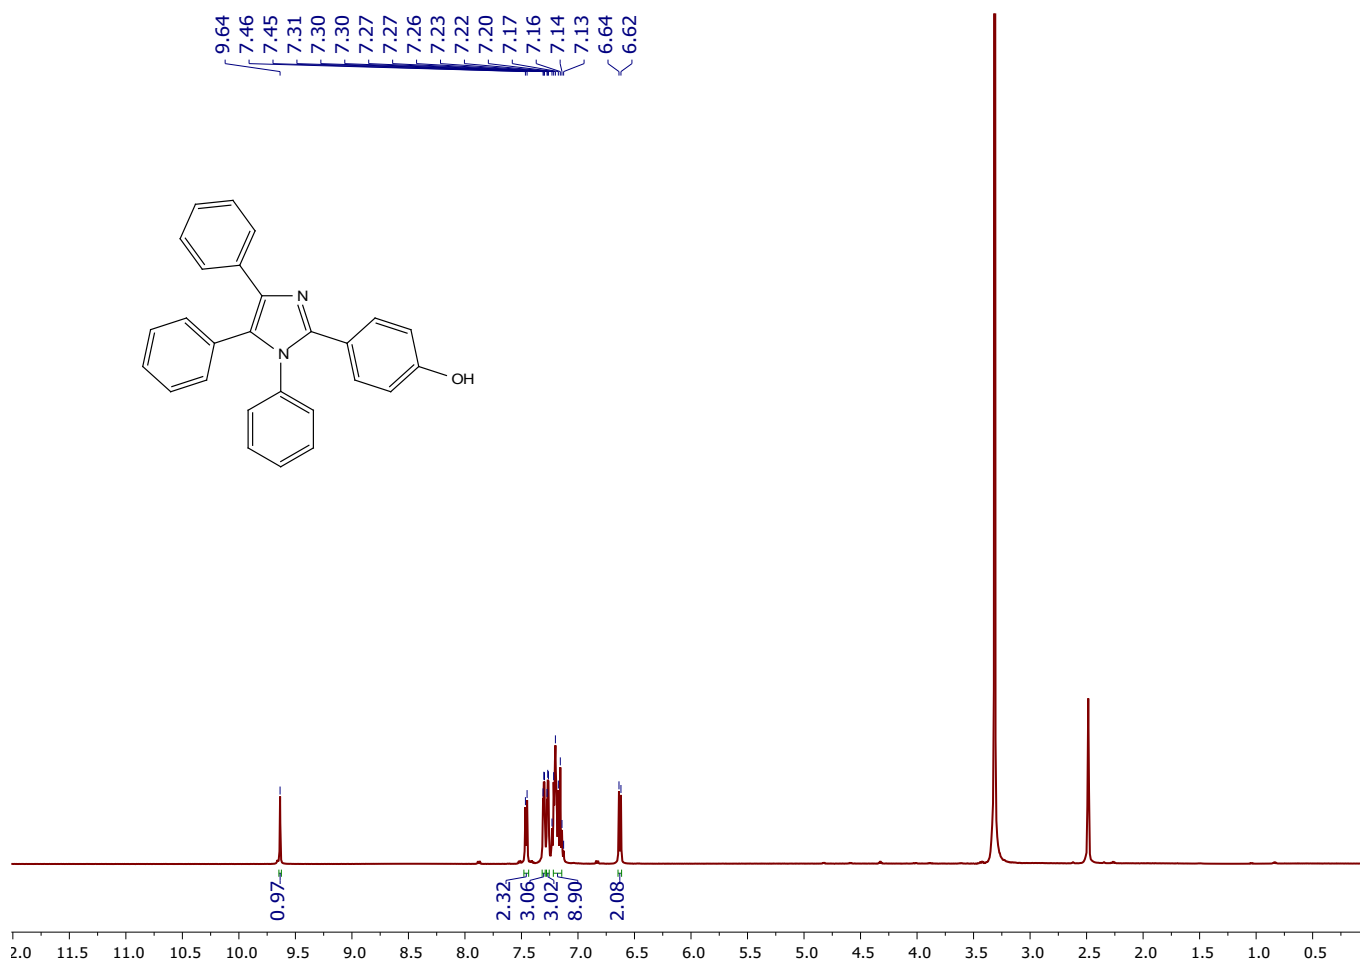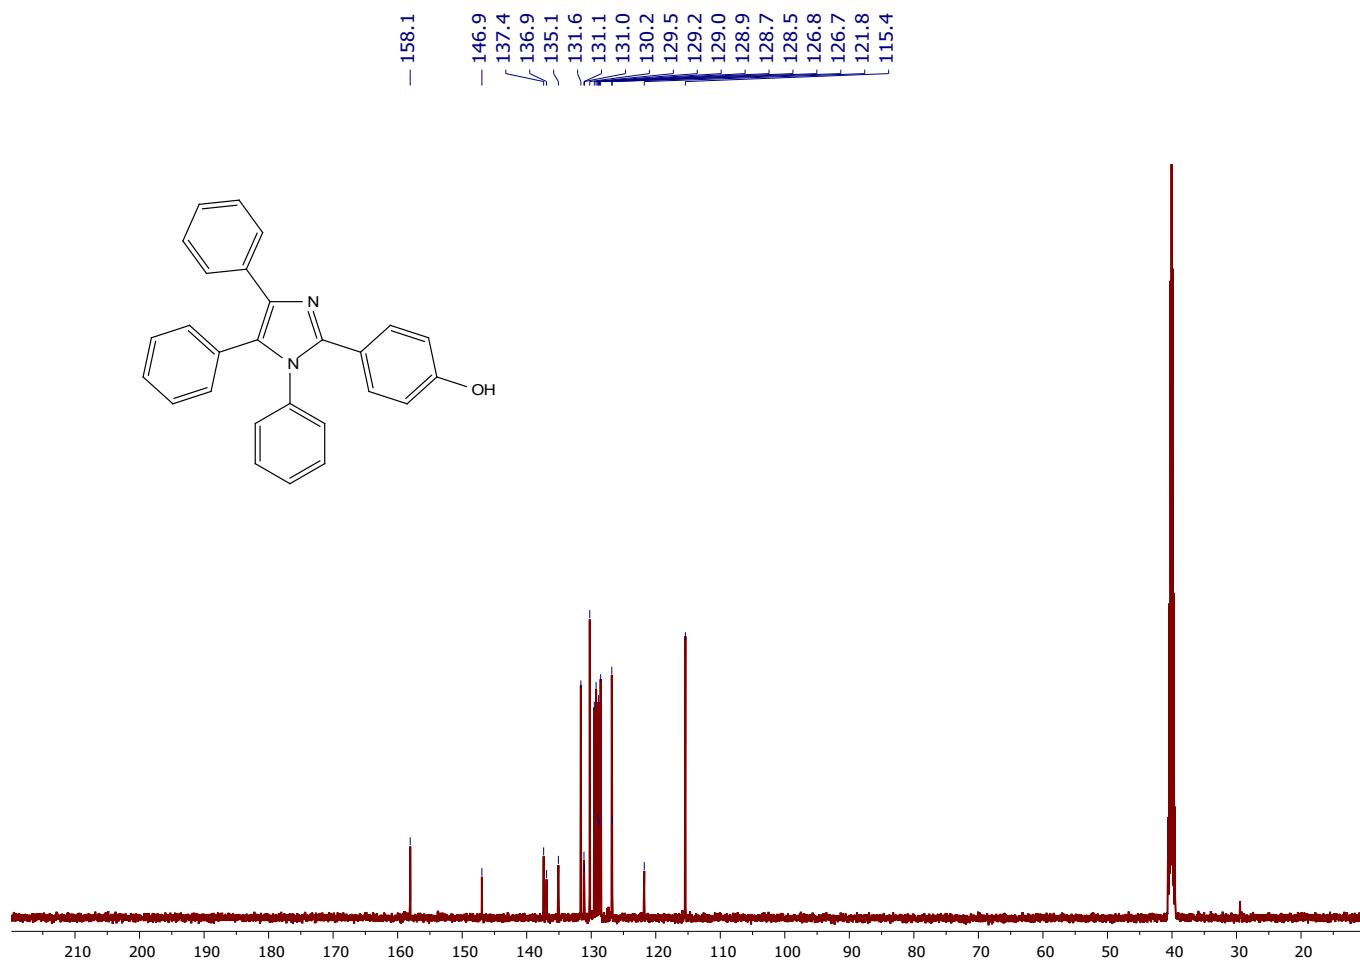

$^1\text{H}$ ,  $^{13}\text{C}$  NMR spectrum of 2-(4-Bromophenyl)-1,4,5-triphenyl-1*H*-imidazole (IMI-07)

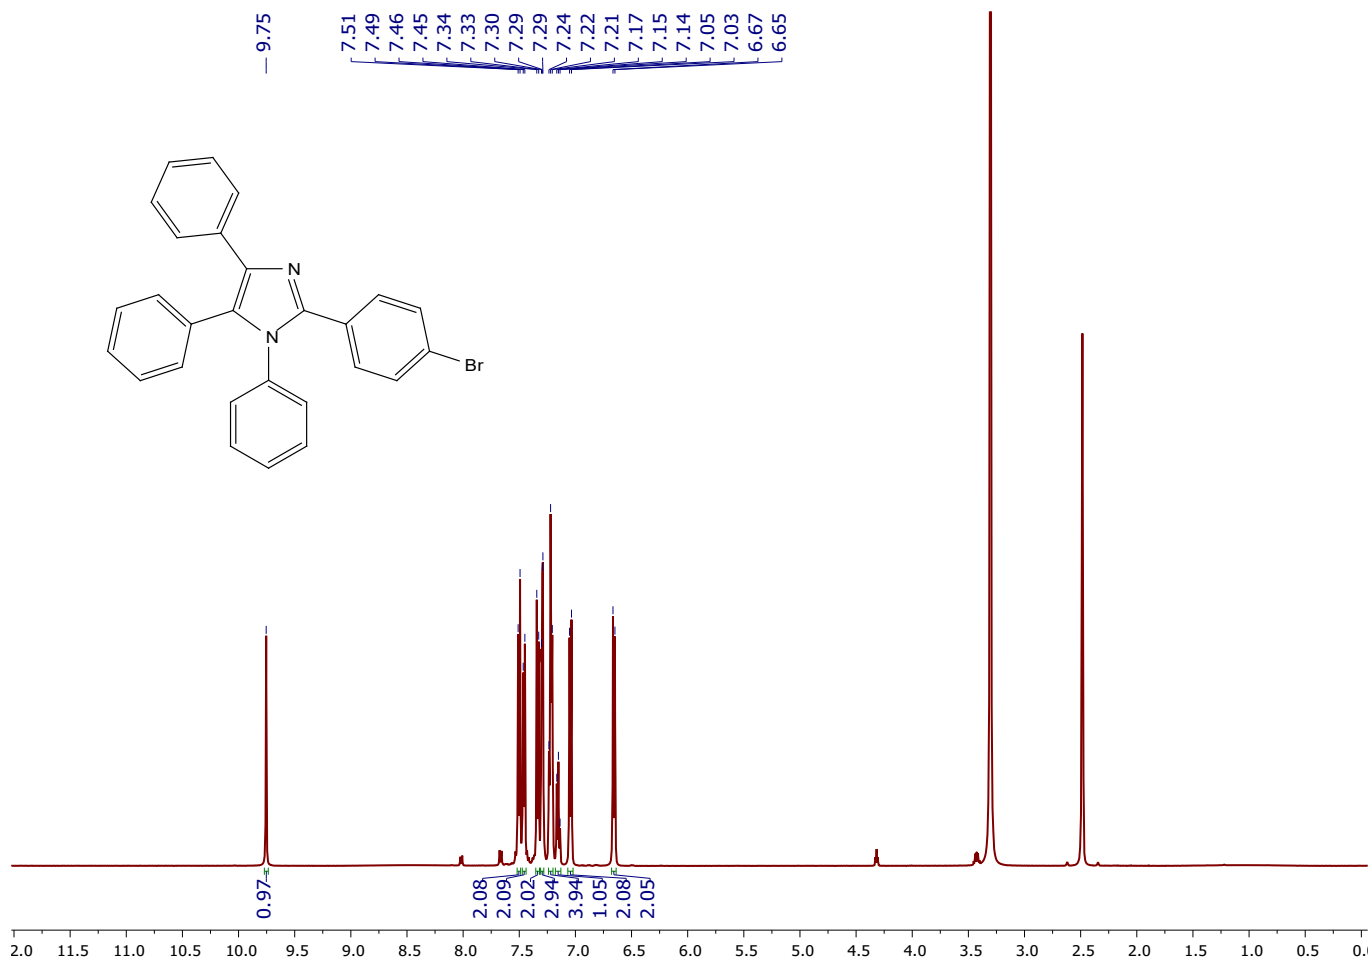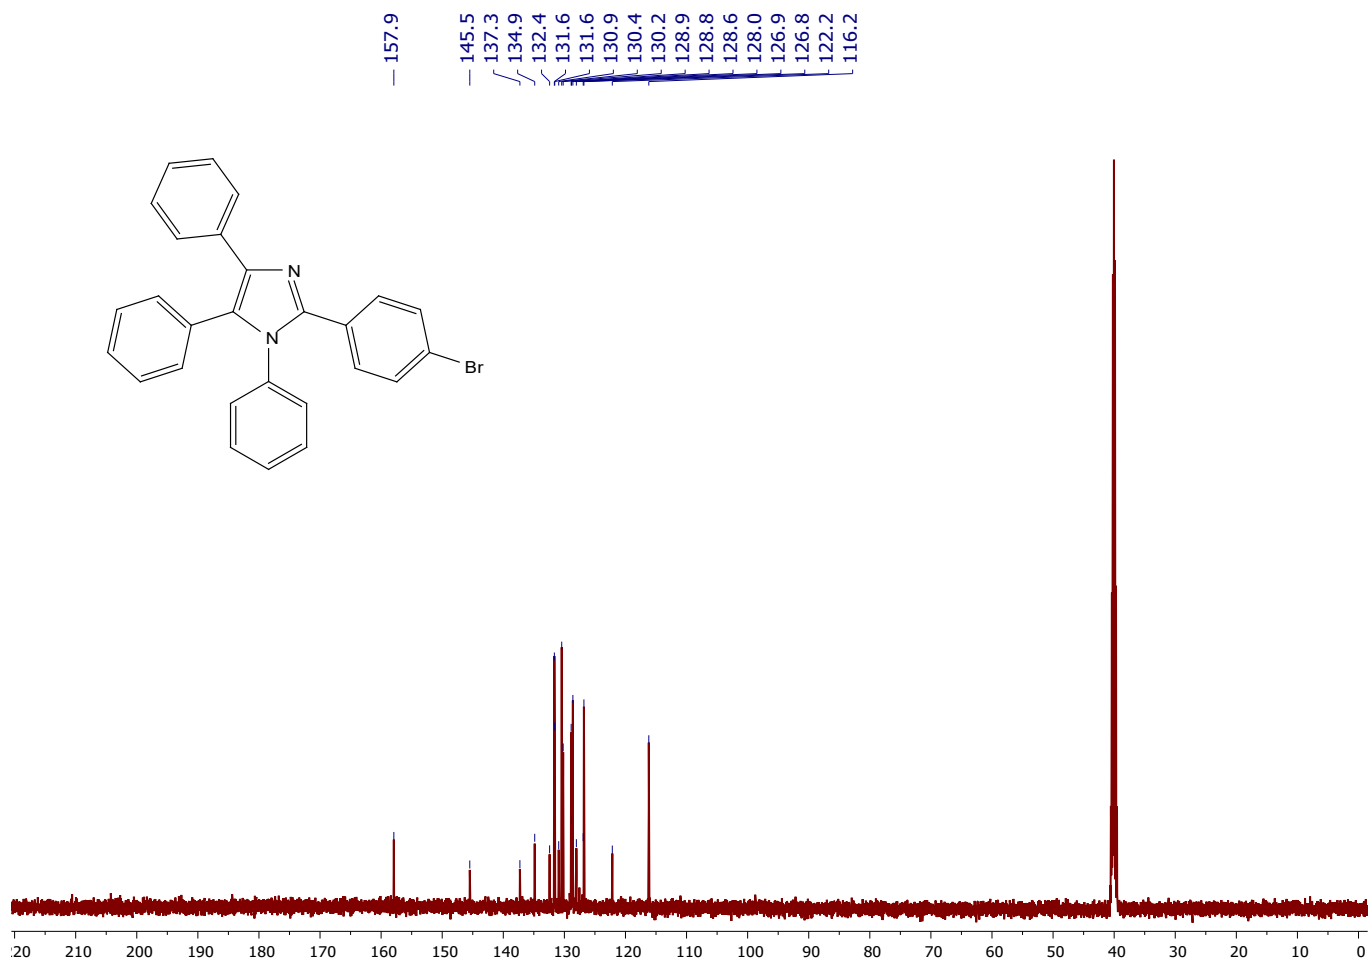

<sup>1</sup>H, <sup>13</sup>C NMR spectrum of 2-(4-*N,N*-dimethylaminophenyl)-1,4,5-triphenyl-1*H*-imidazole (IMI-08)

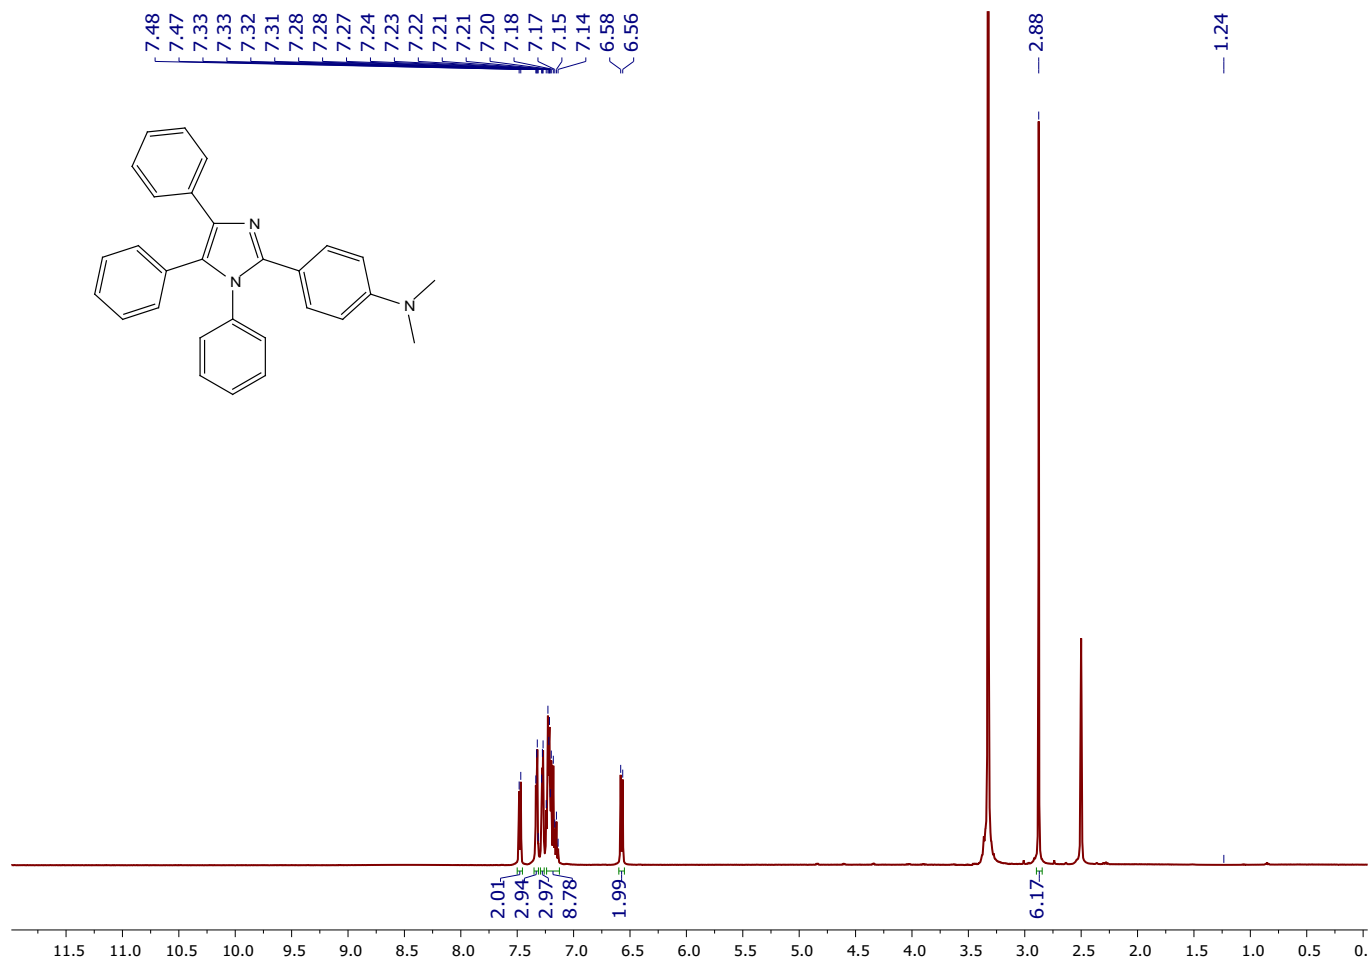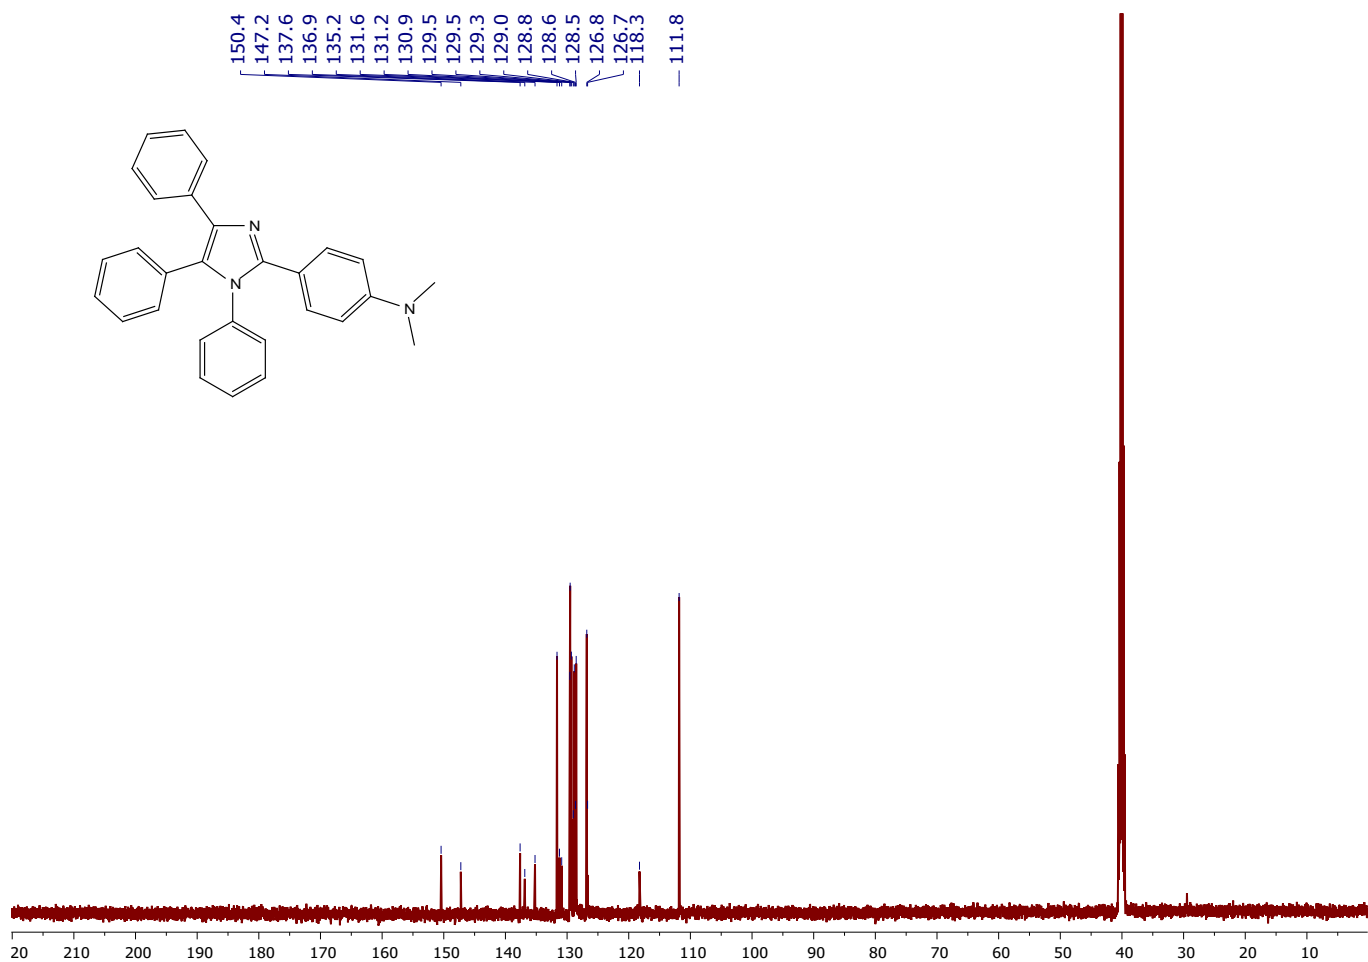



# $^1\text{H}$ , $^{13}\text{C}$ NMR spectrum of 2-(4-Methylphenyl)-1,4,5-triphenyl-1*H*-imidazole (IMI-09)

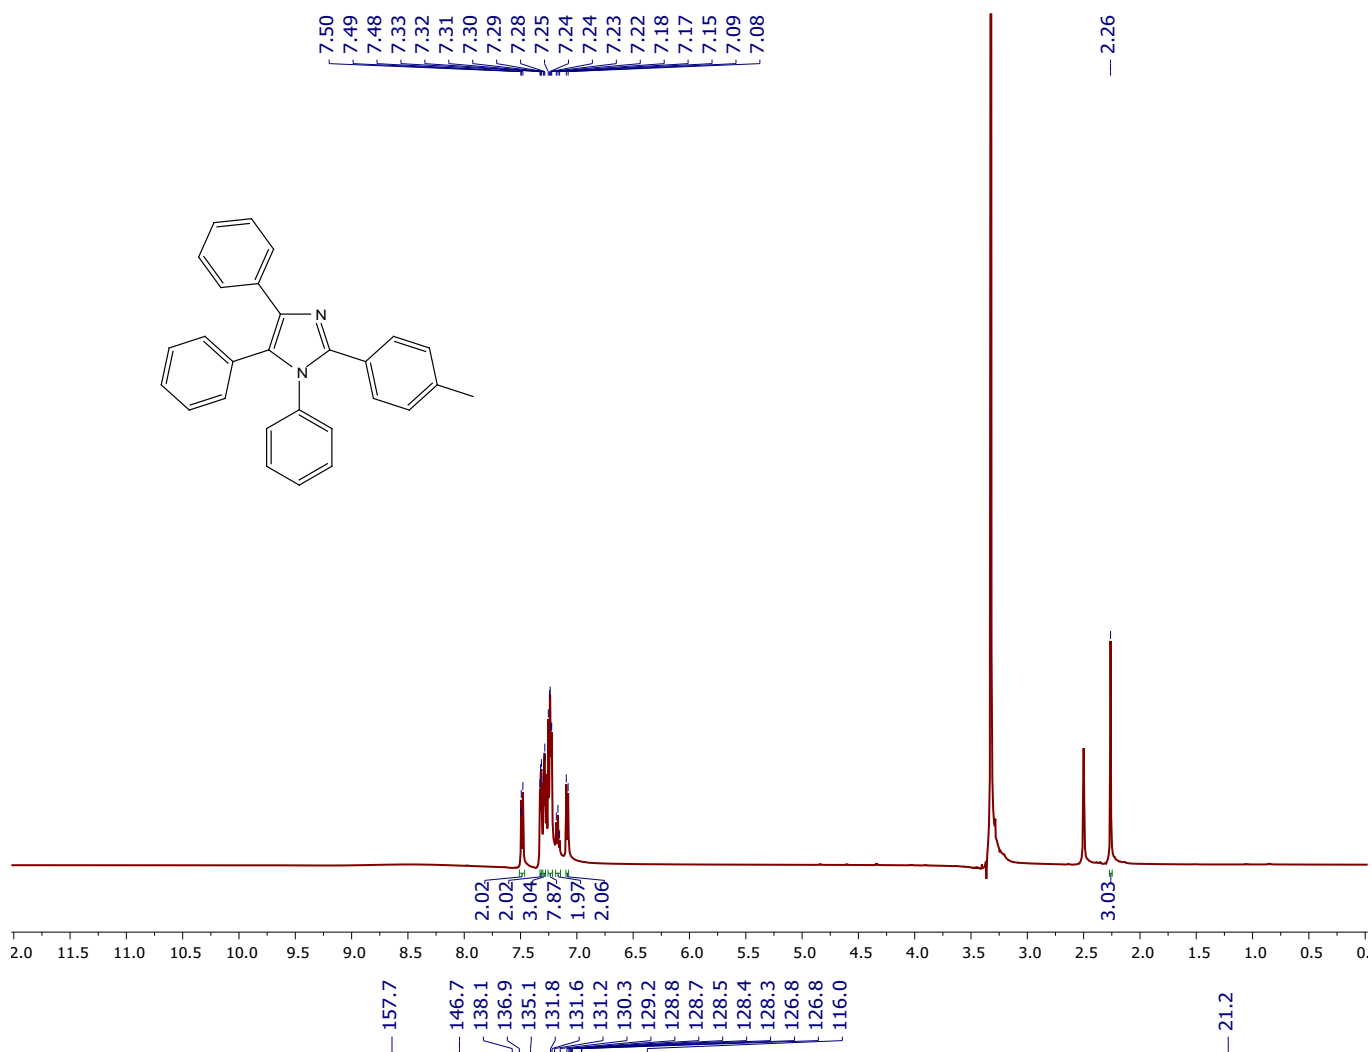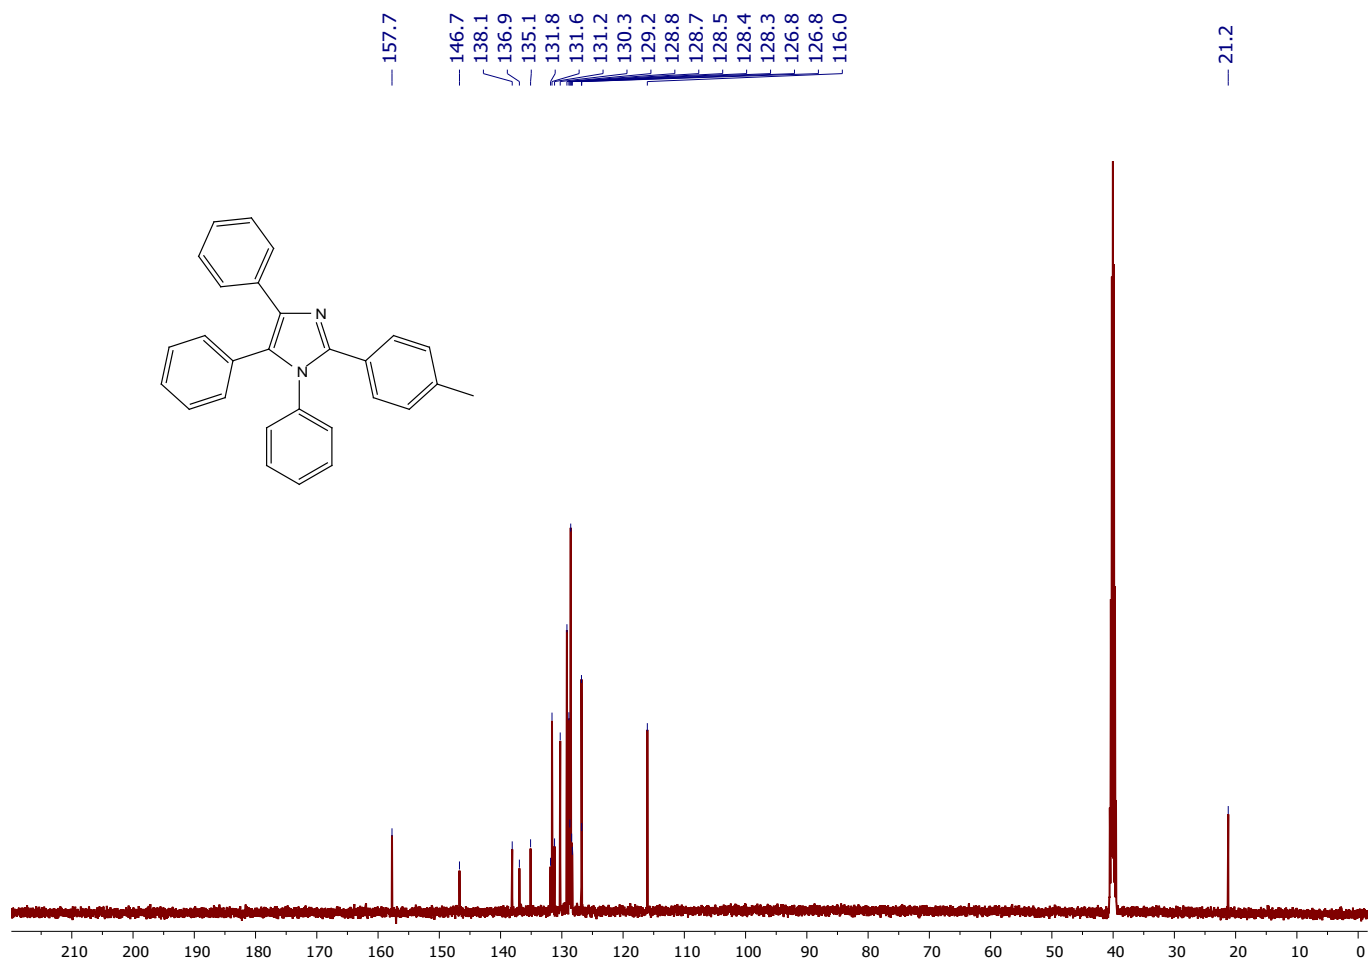

# $^1\text{H}$ , $^{13}\text{C}$ NMR spectrum of 2-Cyclohexyl-1,4,5-triphenyl-1*H*-imidazole (IMI-10)

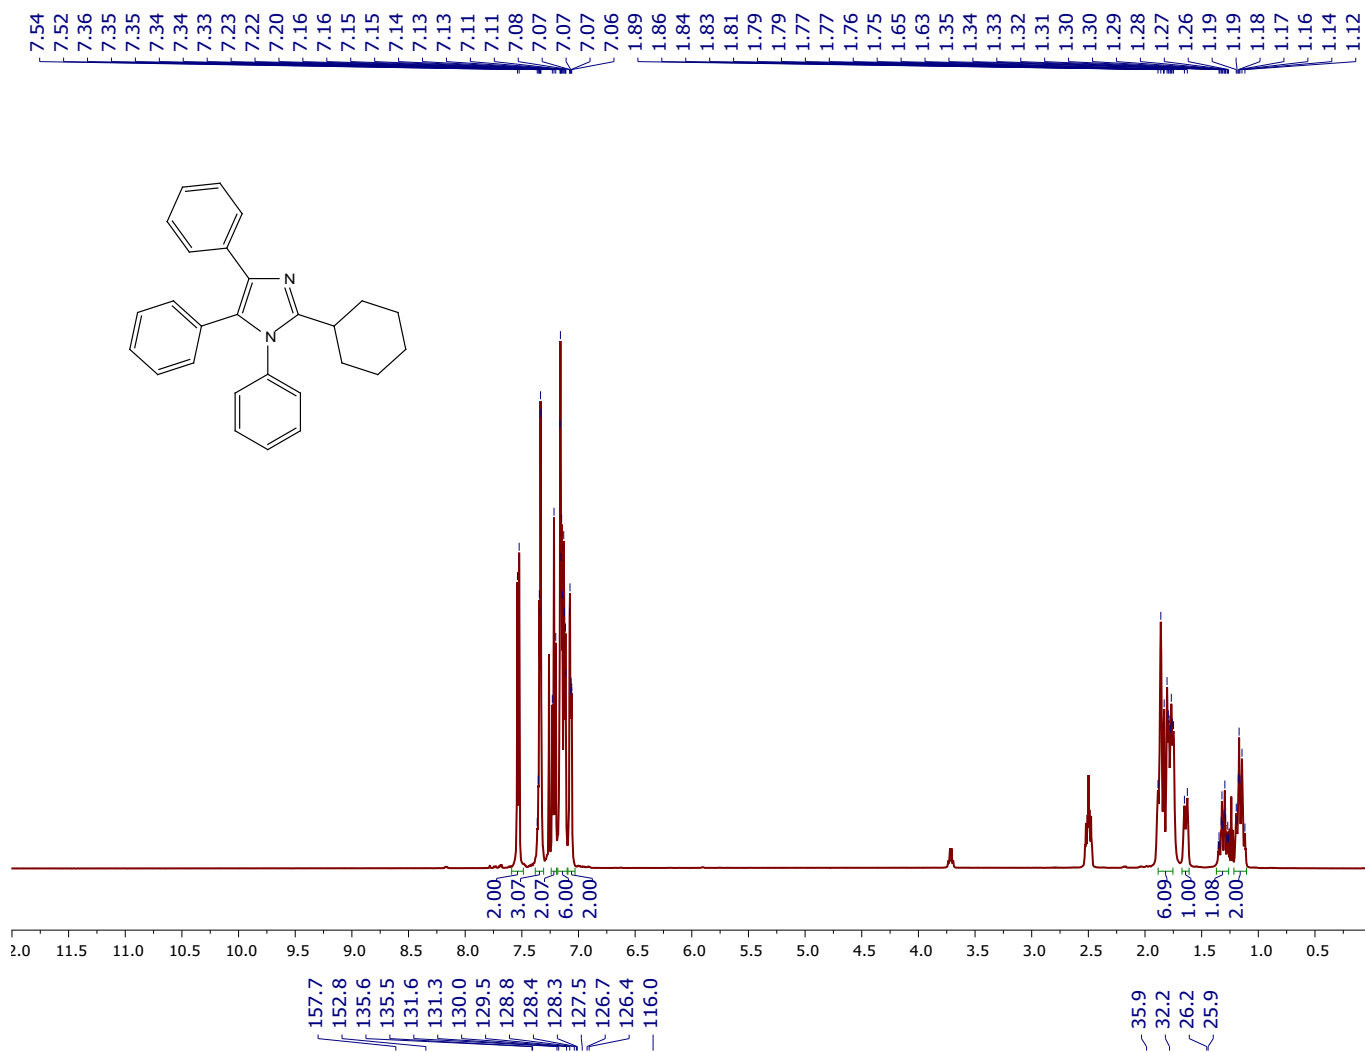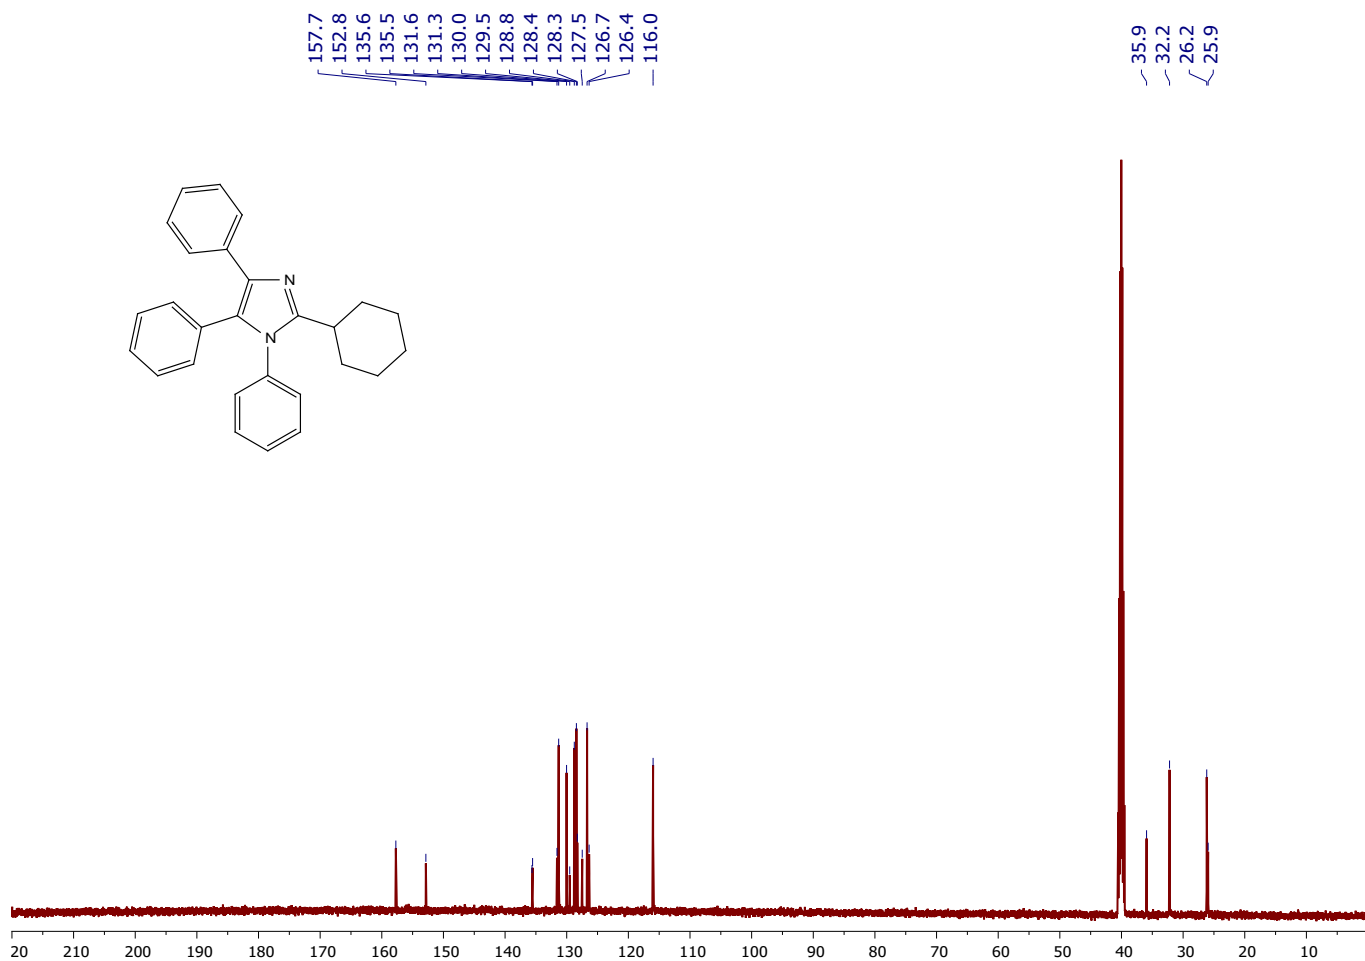

$^1\text{H}$ ,  $^{13}\text{C}$  NMR spectrum of 2-(Furan-2-yl)-1,4,5-triphenyl-1*H*-imidazole (IMI-11)

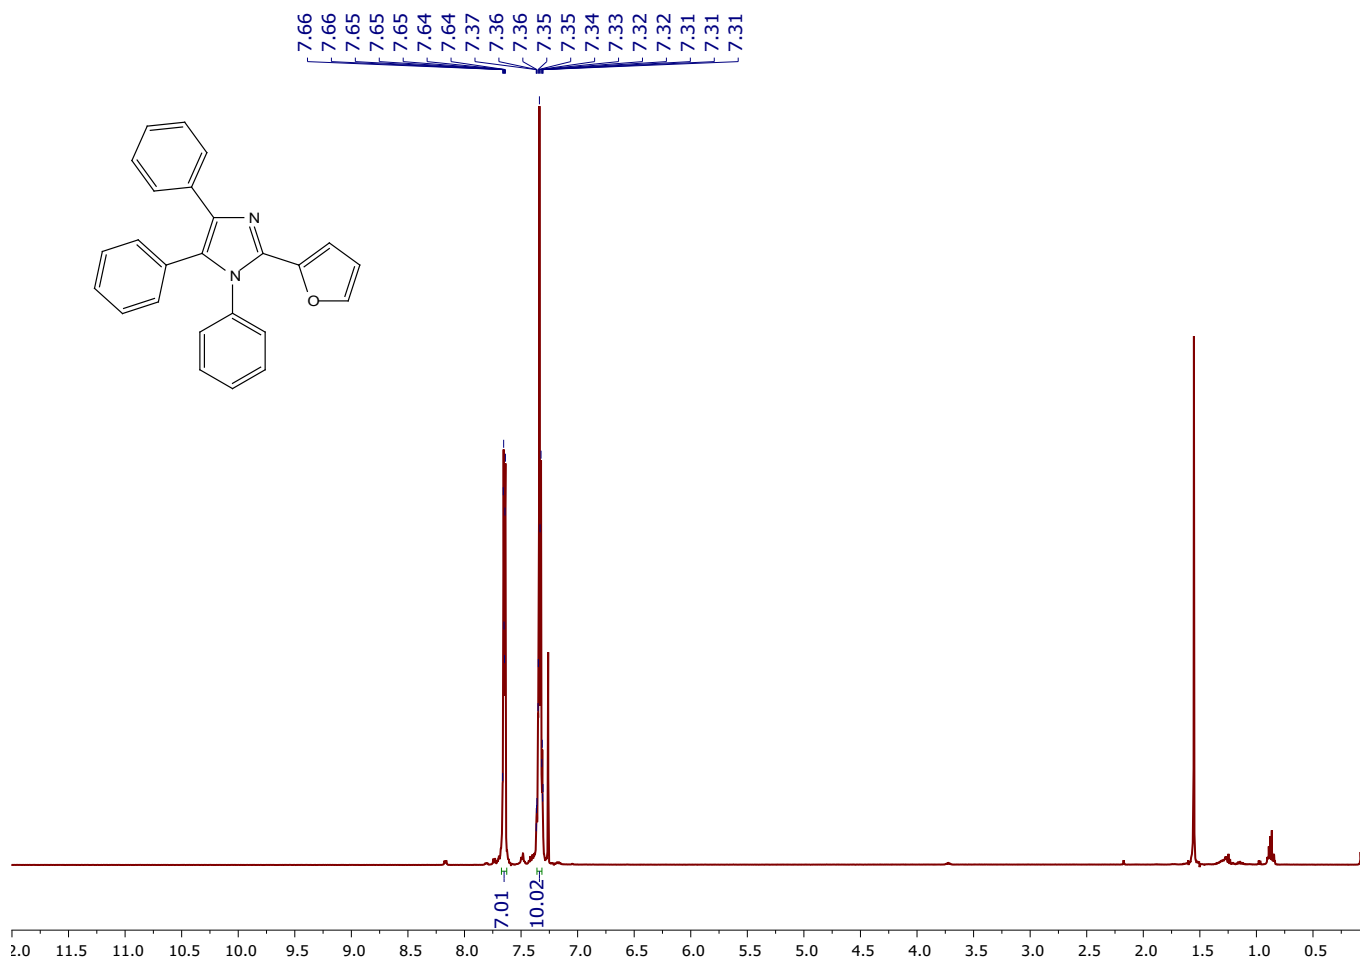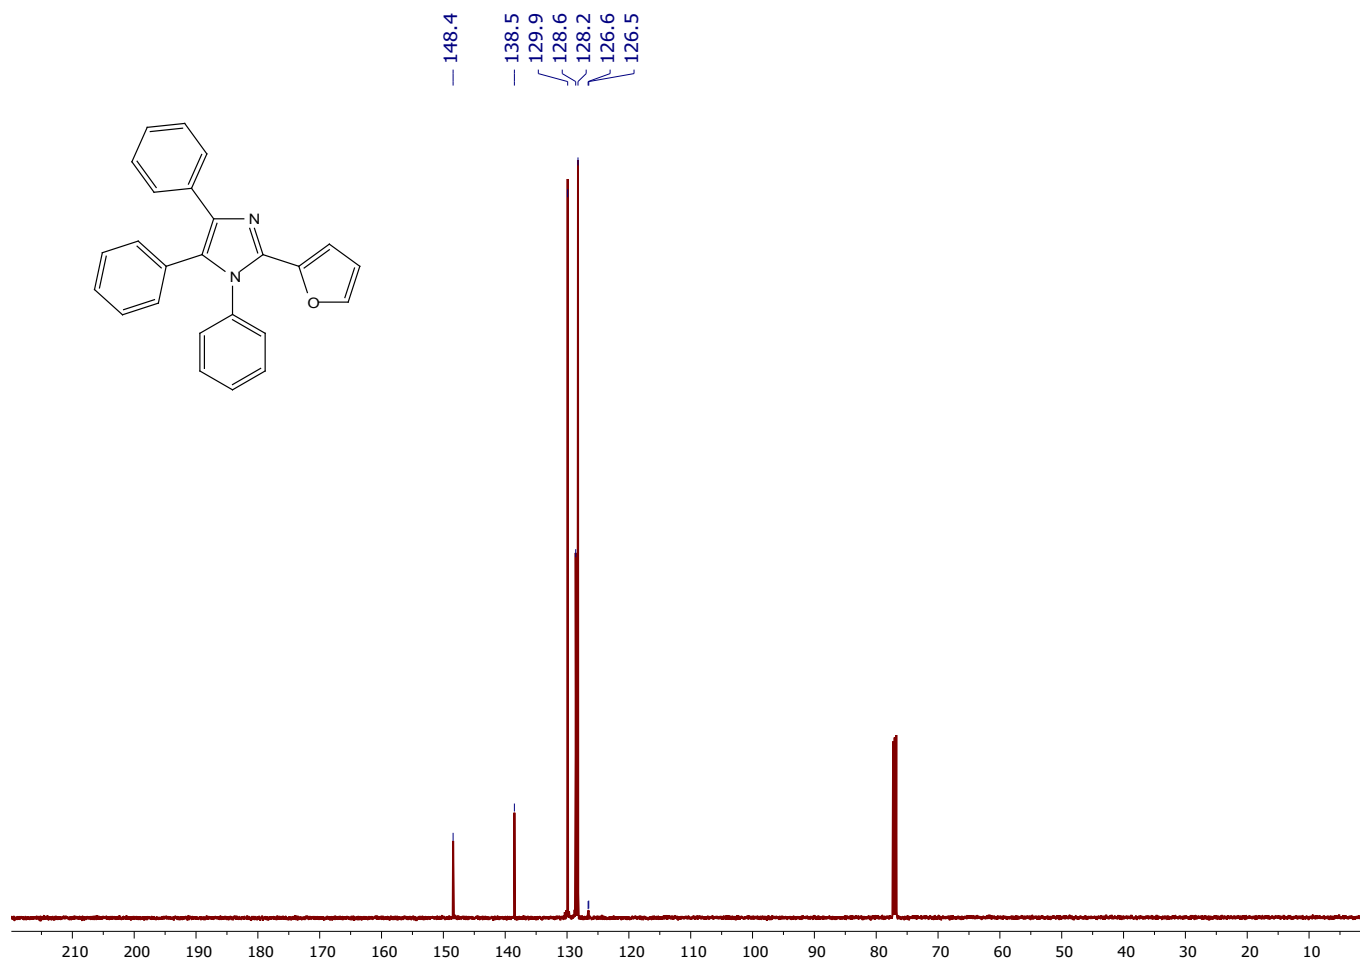

# $^1\text{H}$ , $^{13}\text{C}$ NMR spectrum of 1-(4-Hydroxyphenyl)-2,4,5-triphenyl-1*H*-imidazole (IMI-12)

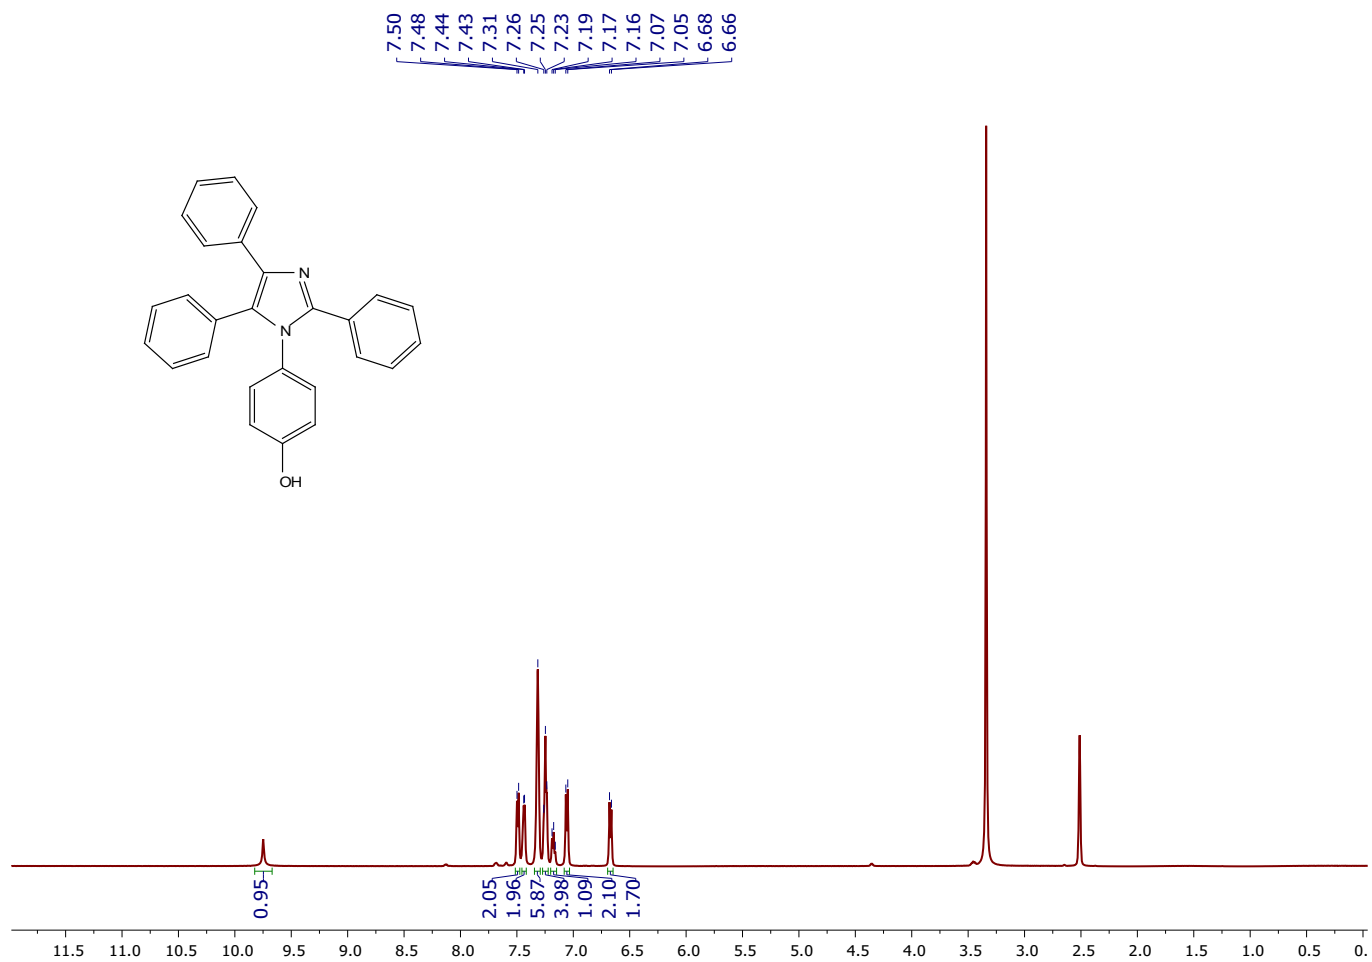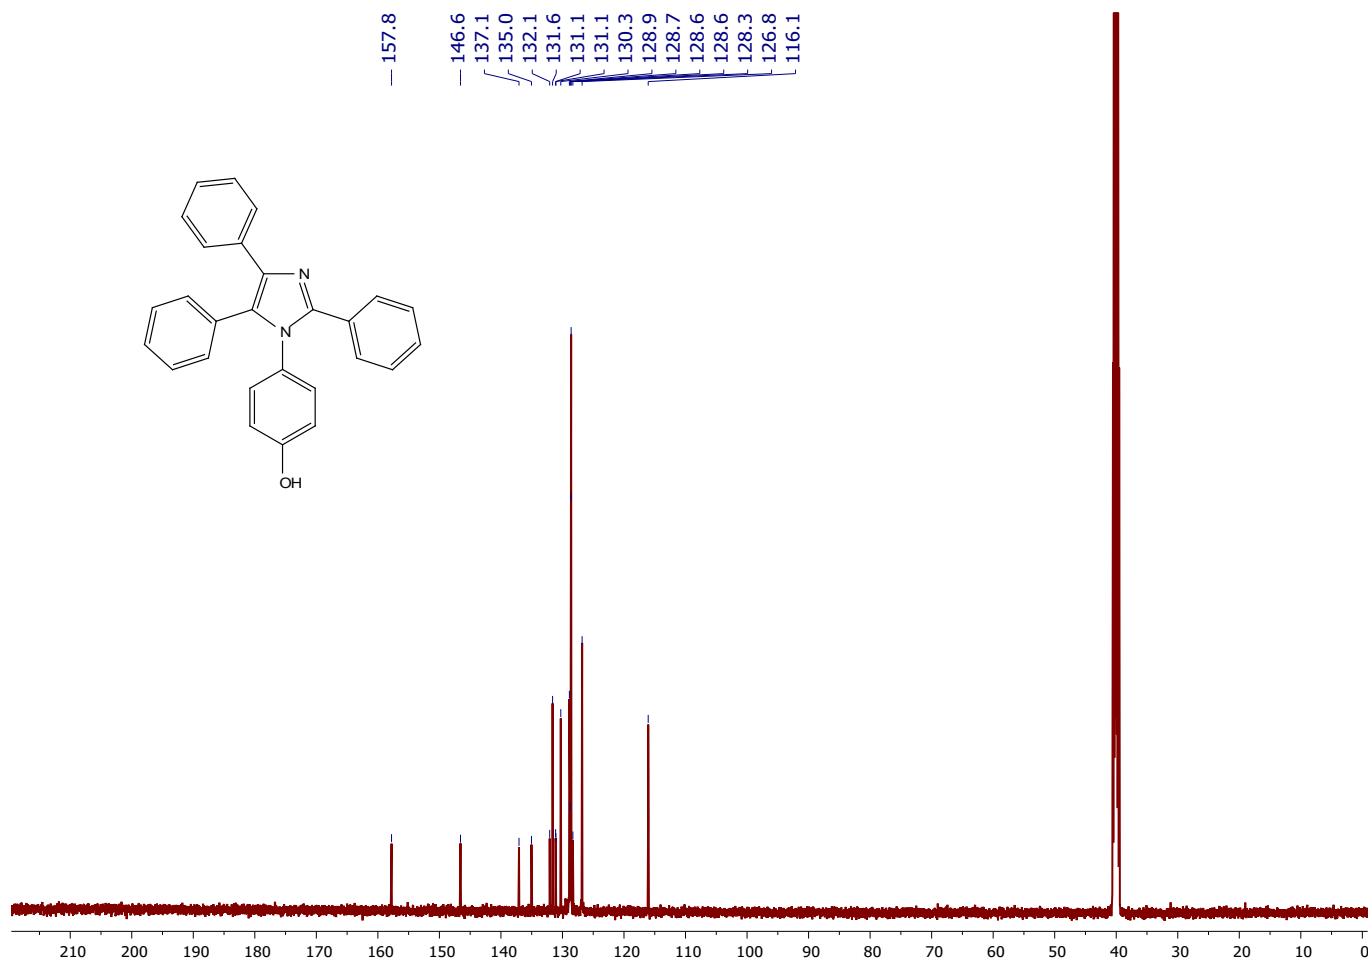

**$^1\text{H}$ ,  $^{13}\text{C}$  NMR spectrum of 1-(4-Hydroxyphenyl)-2-(4-hydroxy-3-methoxyphenyl)-4,5-diphenyl-1*H*-imidazole (IMI-13)**

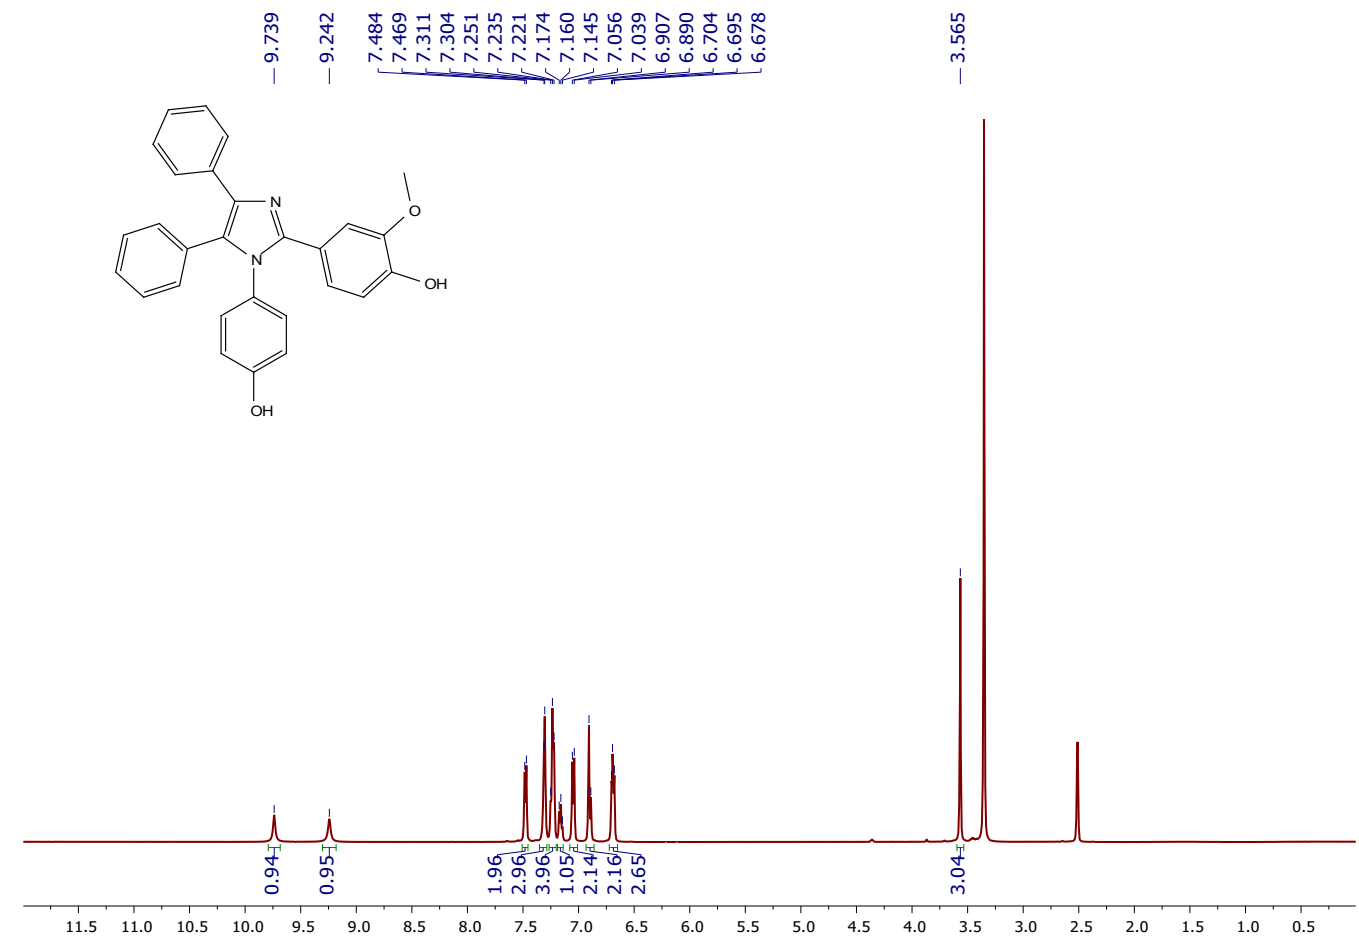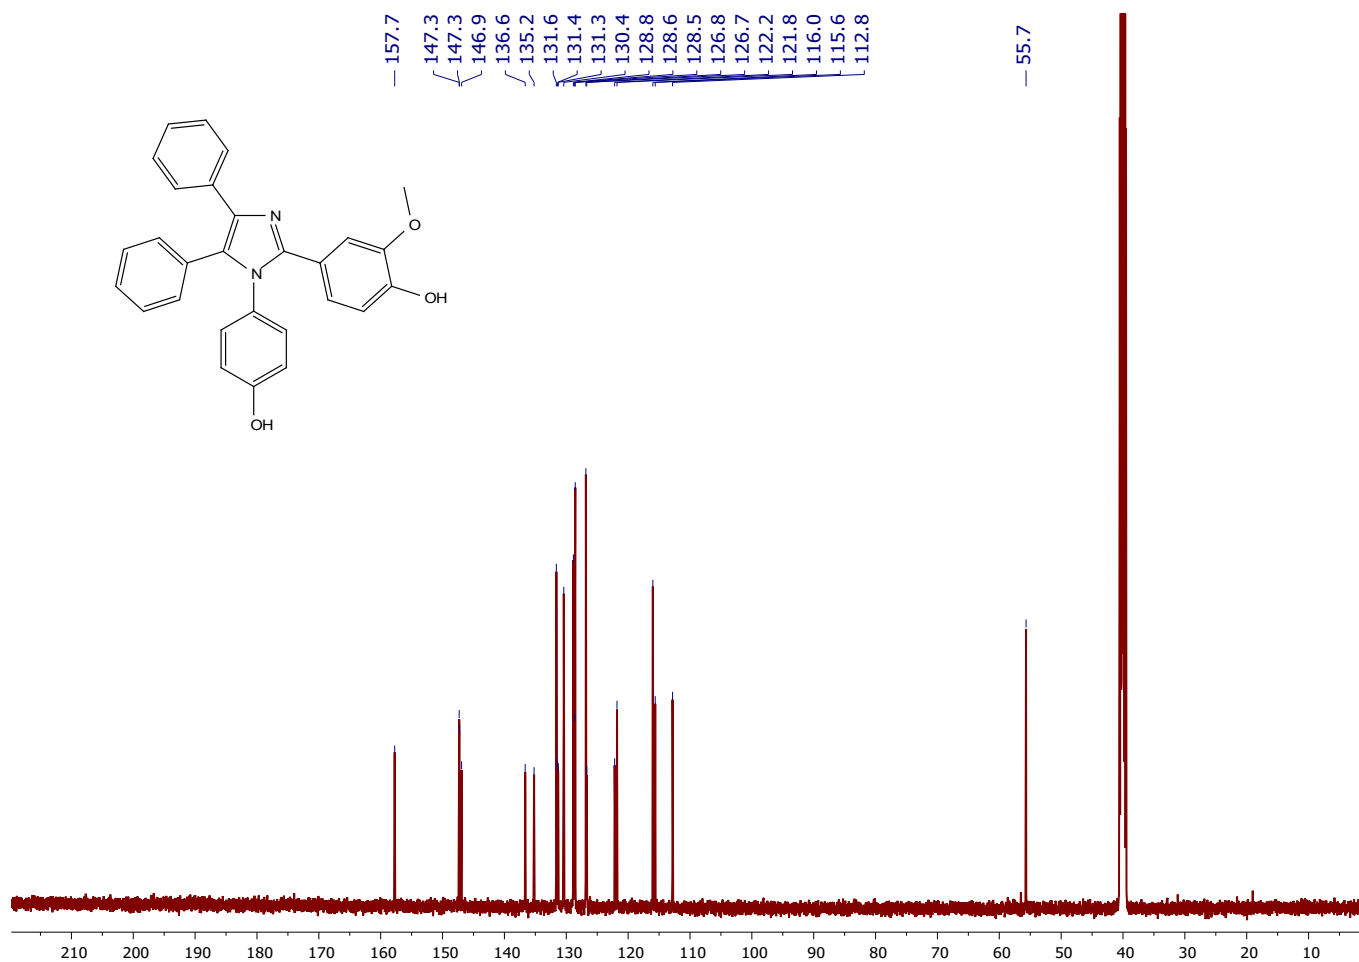

**<sup>1</sup>H, <sup>13</sup>C NMR spectrum of 1-(4-Hydroxyphenyl)-2-(4-nitrophenyl)-4,5-diphenyl-1H-imidazole (IMI-14)**

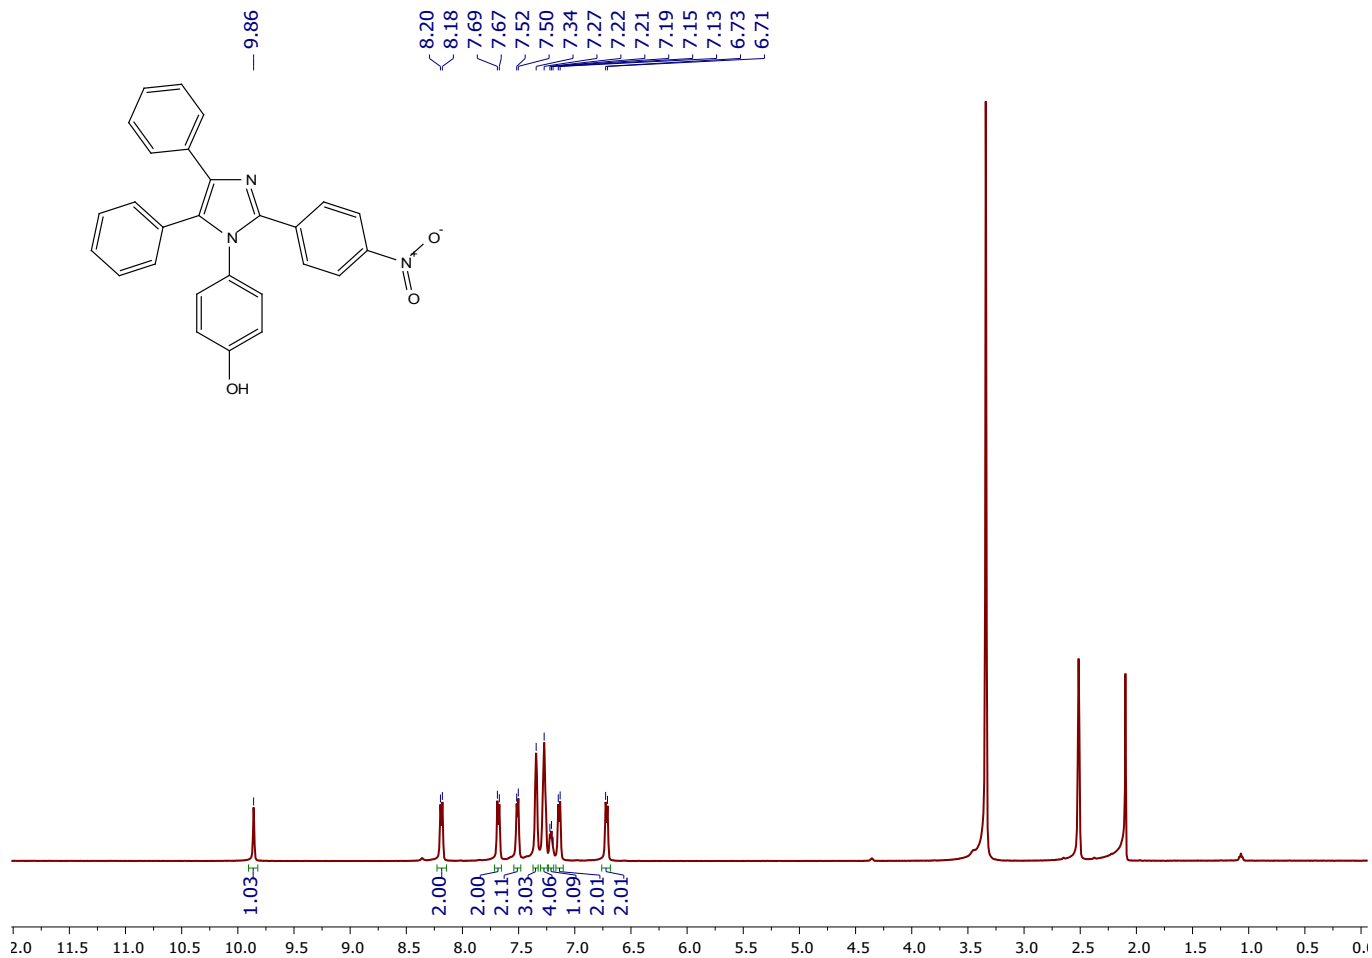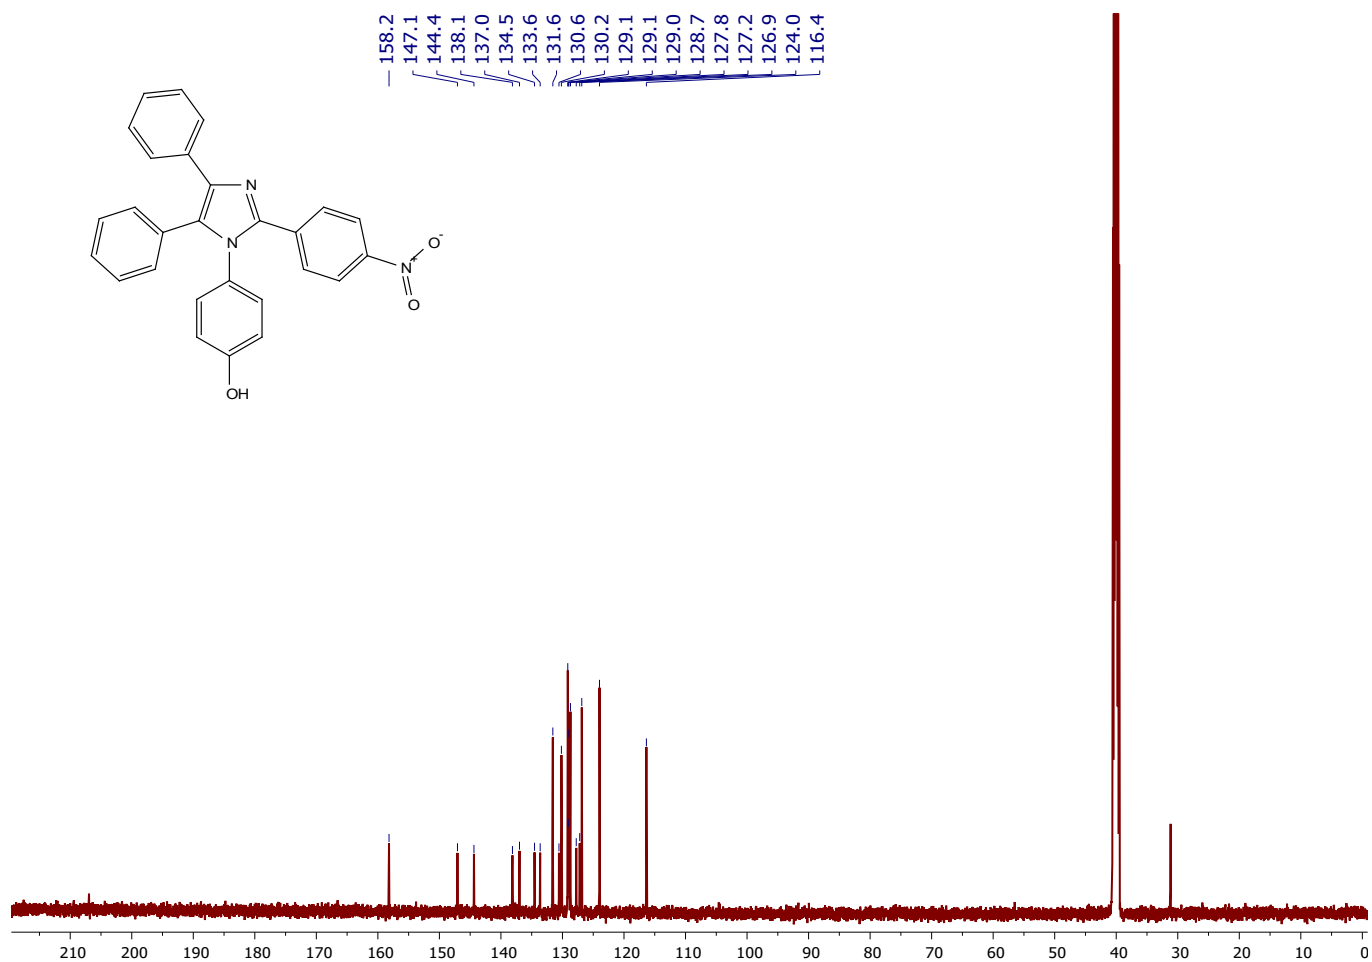

# <sup>1</sup>H, <sup>13</sup>C NMR spectrum of 1,2-(4-Hydroxyphenyl)-4,5-diphenyl-1H-imidazole (IMI-15)

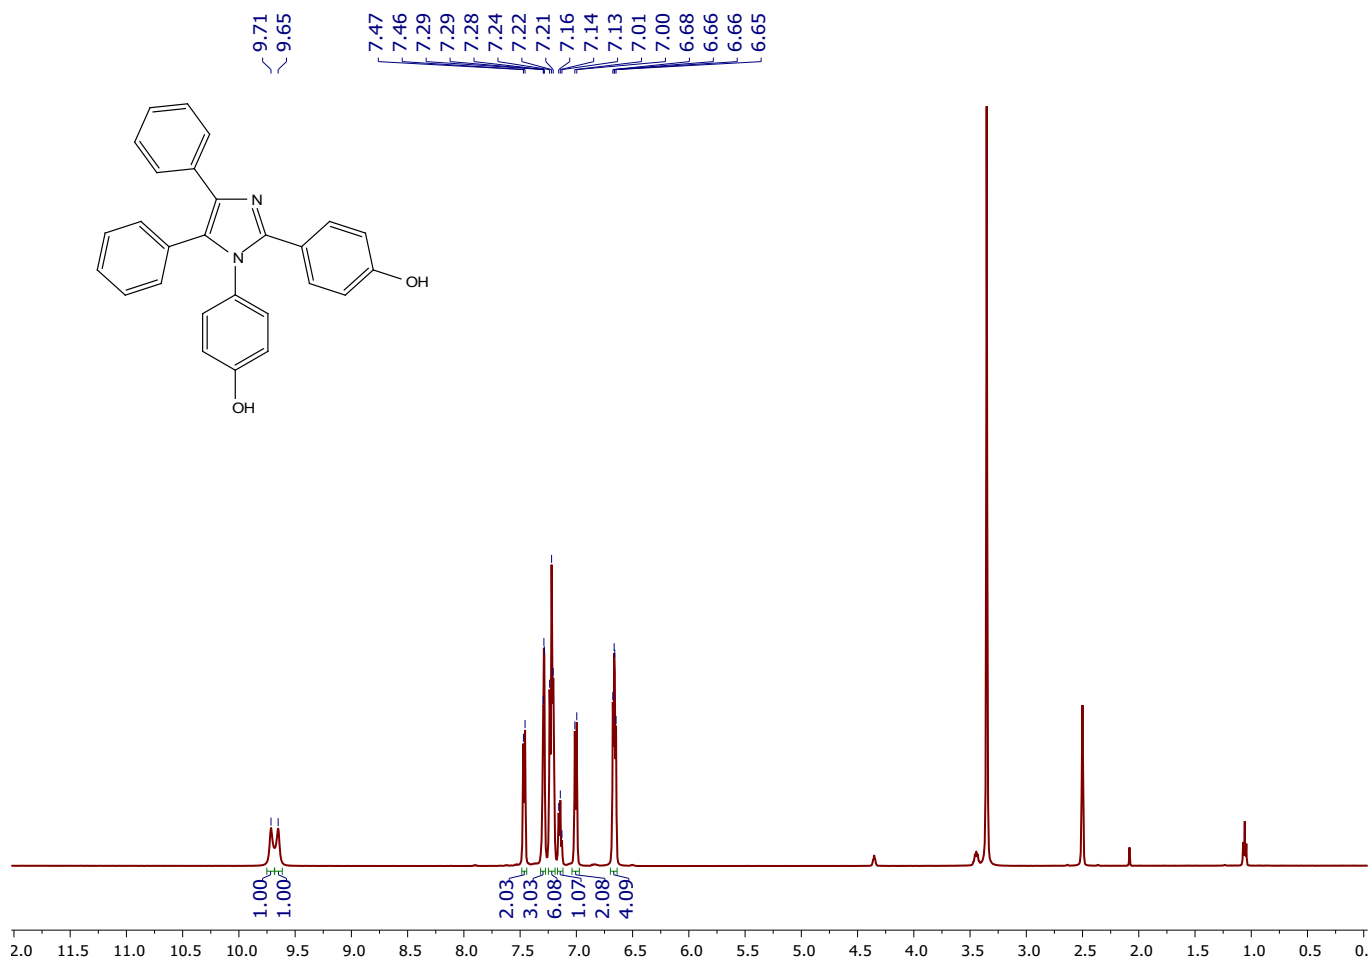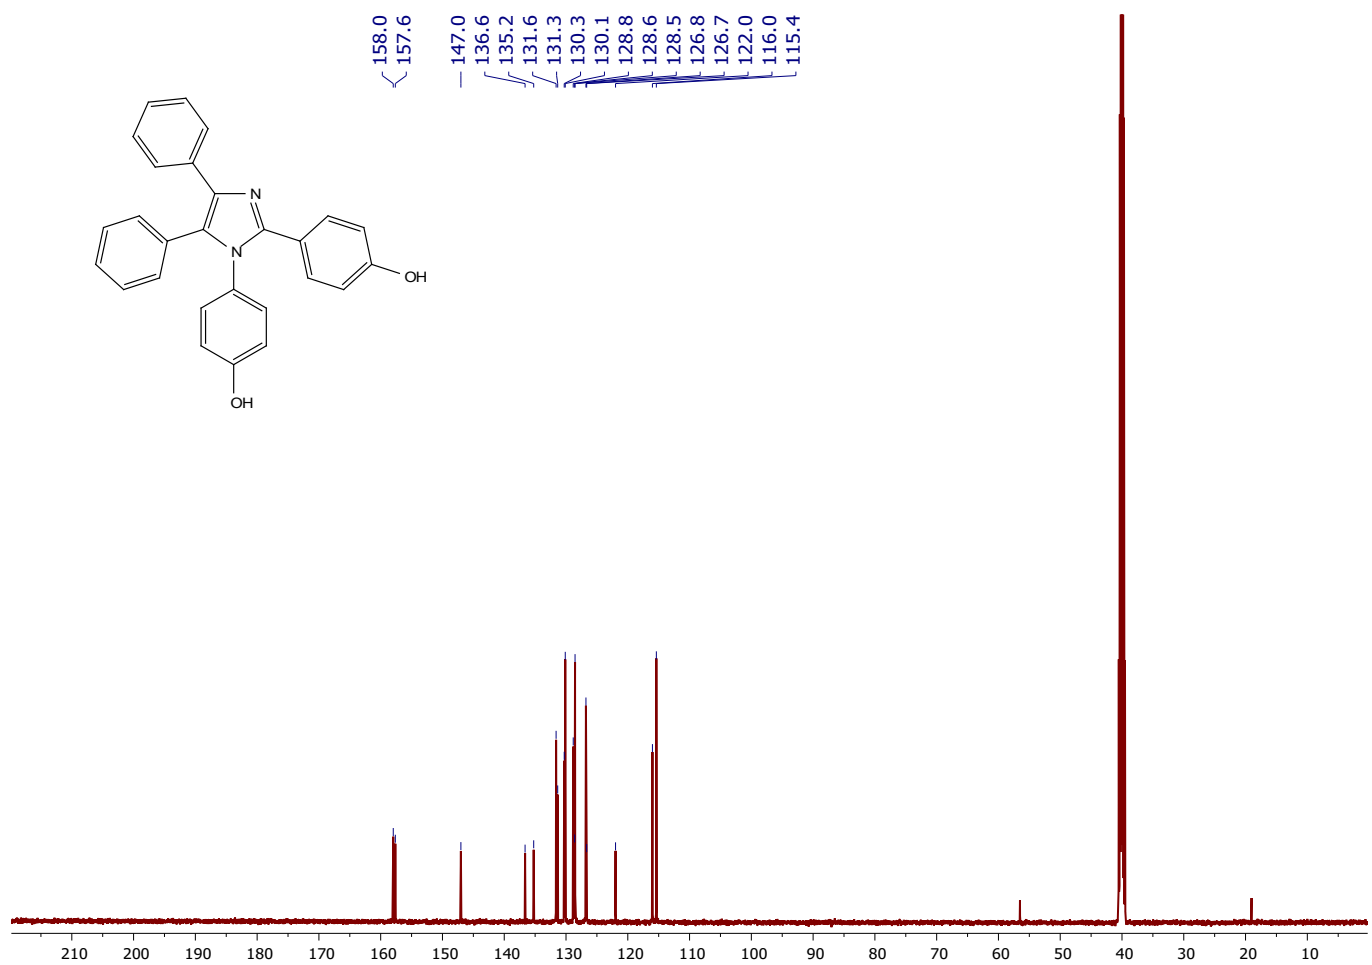

**$^1\text{H}$ ,  $^{13}\text{C}$  NMR spectrum of 1-(4-Hydroxyphenyl)-2-(4-methylphenyl)-4,5-diphenyl-1H-imidazole (IMI-16)**

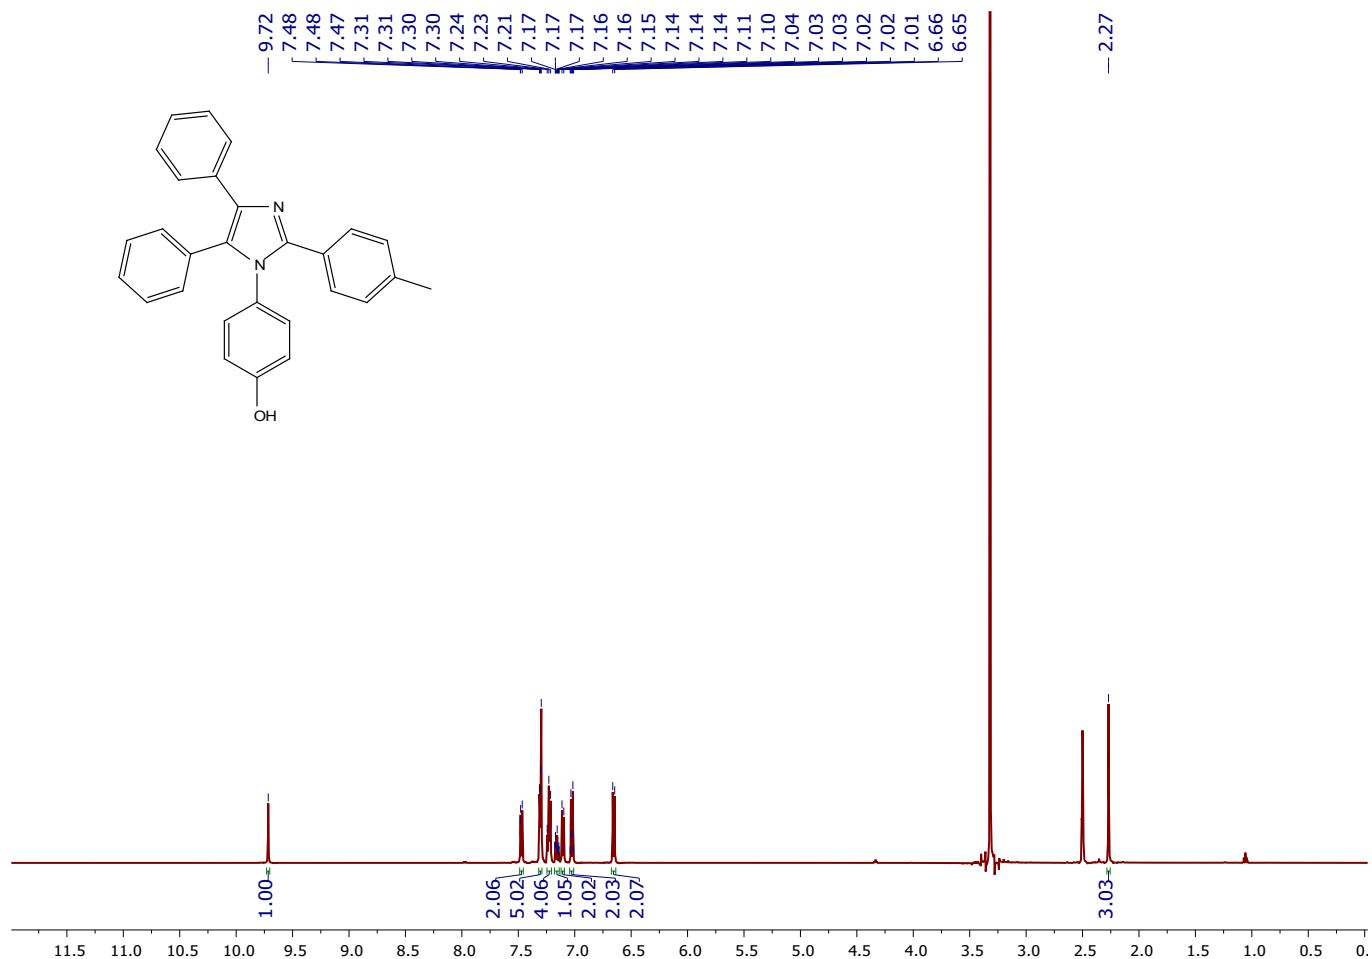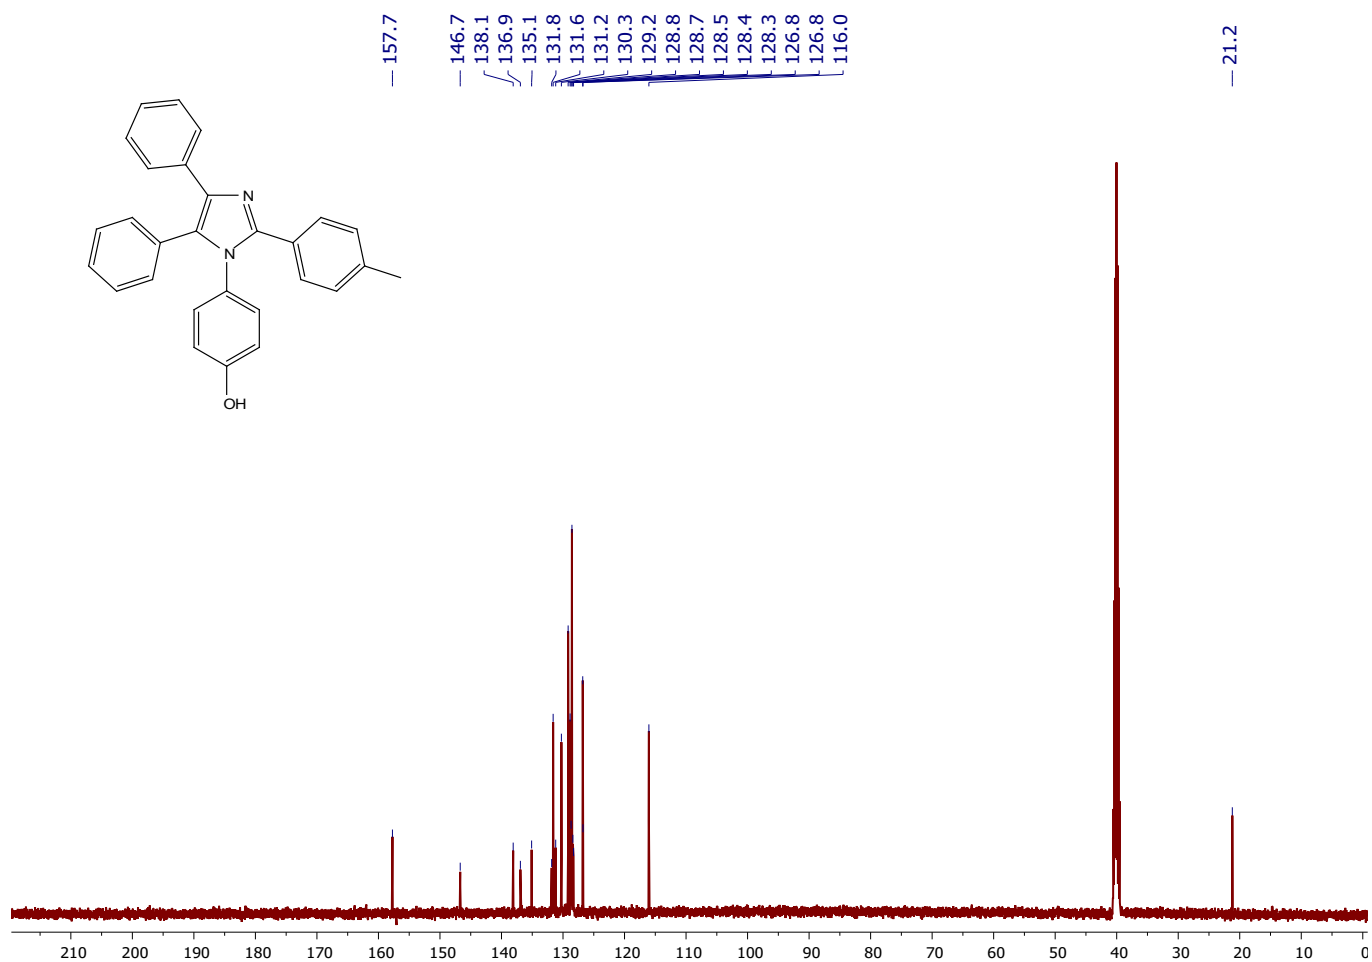



**<sup>1</sup>H, <sup>13</sup>C NMR spectrum of 1-(4-Hydroxyphenyl)-2-(4-bromophenyl)-4,5-diphenyl-1H-imidazole (IMI-17)**

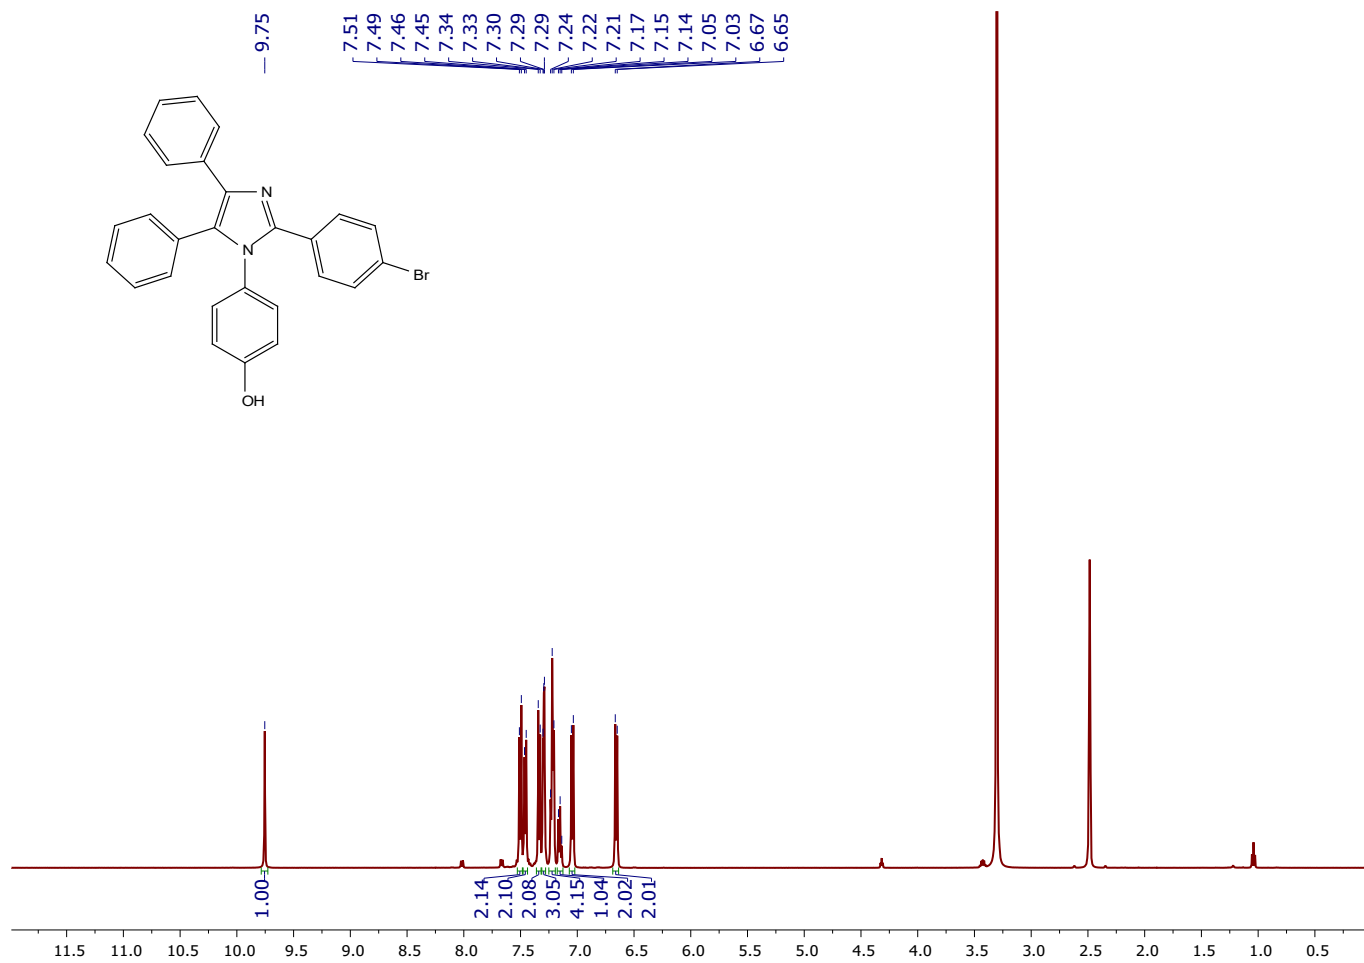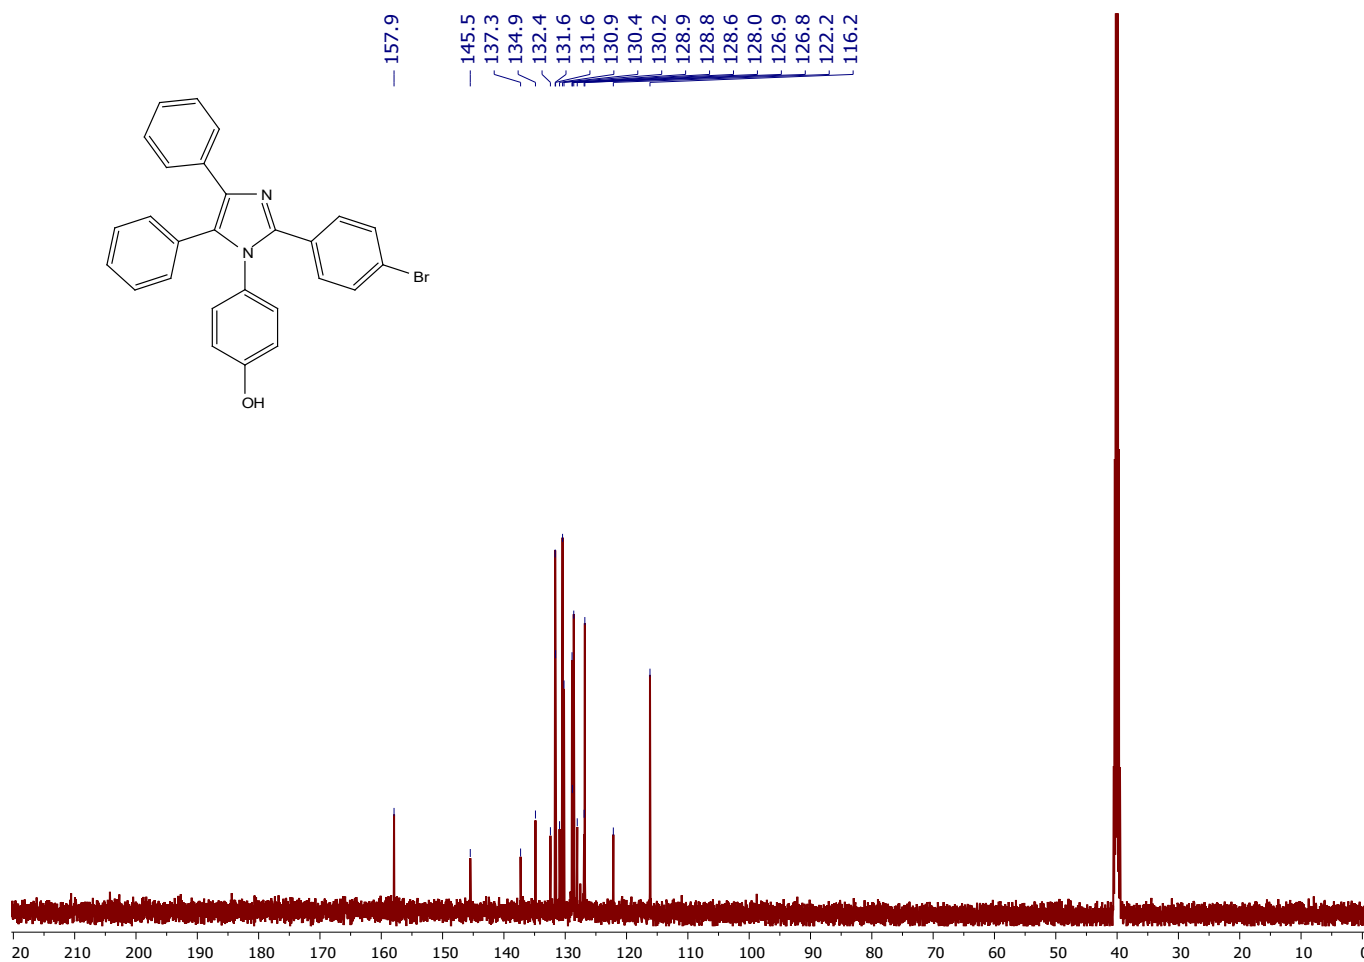

<sup>1</sup>H, <sup>13</sup>C NMR spectrum of 1-(4-Hydroxyphenyl)-2-(4-fluorophenyl)-4,5-diphenyl-1H-imidazole (IMI-18)

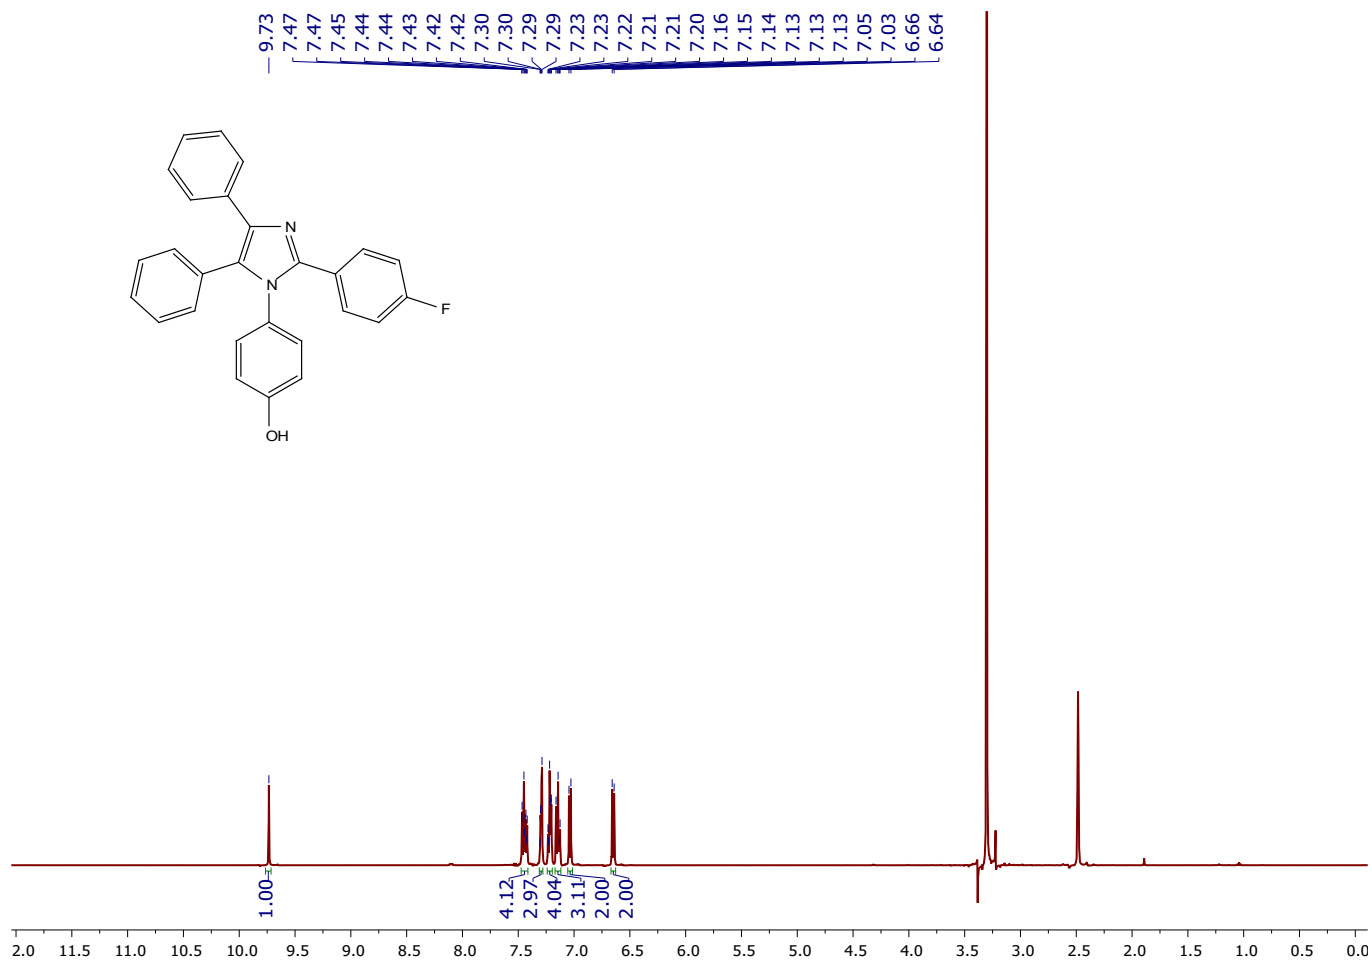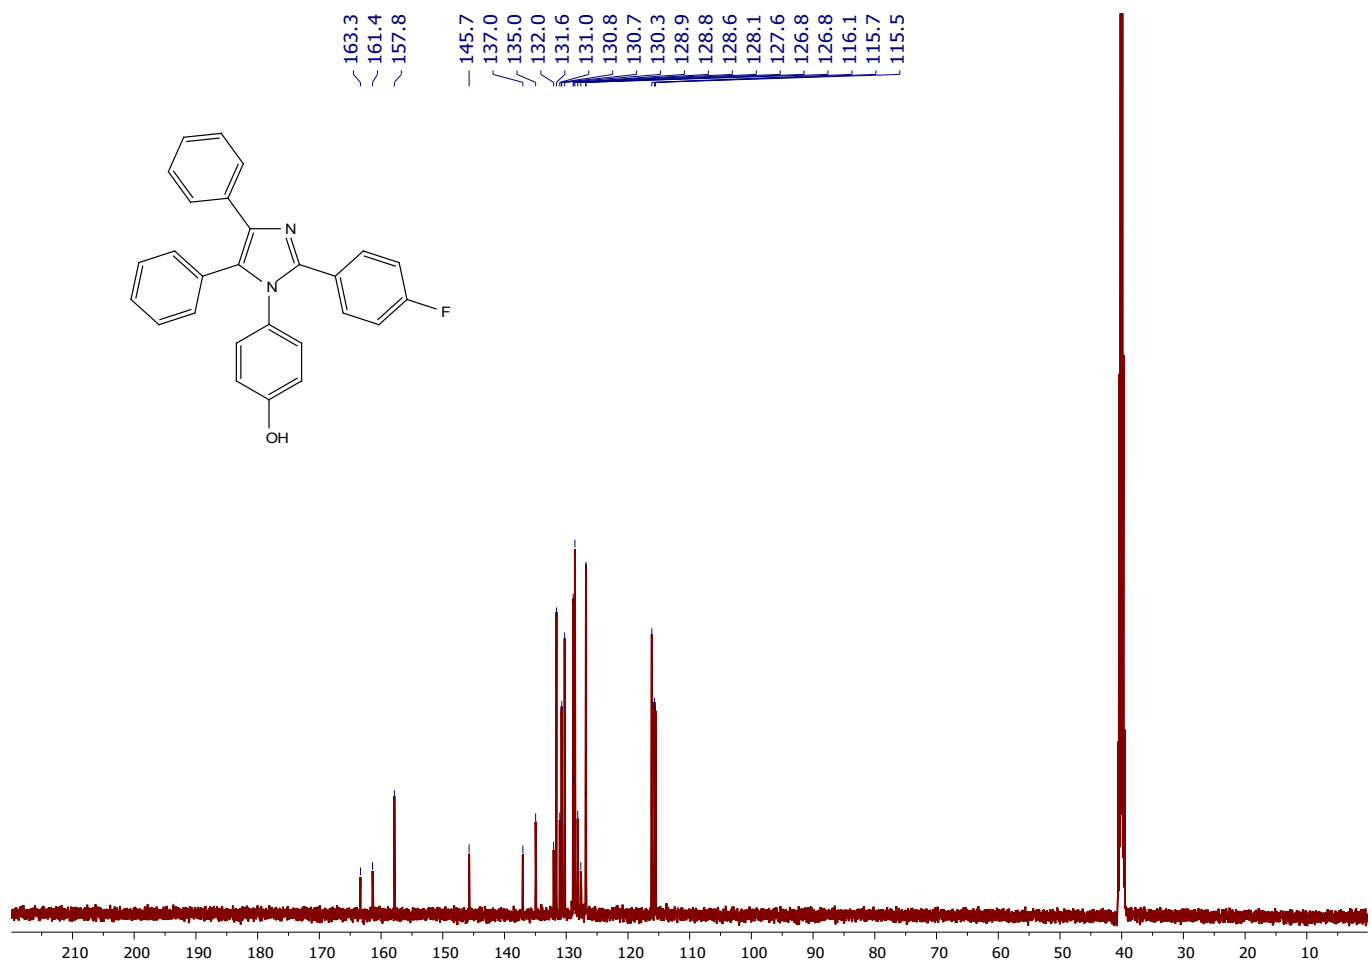

**<sup>1</sup>H, <sup>13</sup>C NMR spectrum of 1-(4-Hydroxyphenyl)-2-(4-methoxyphenyl)-4,5-diphenyl-1H-imidazole (IMI-19)**

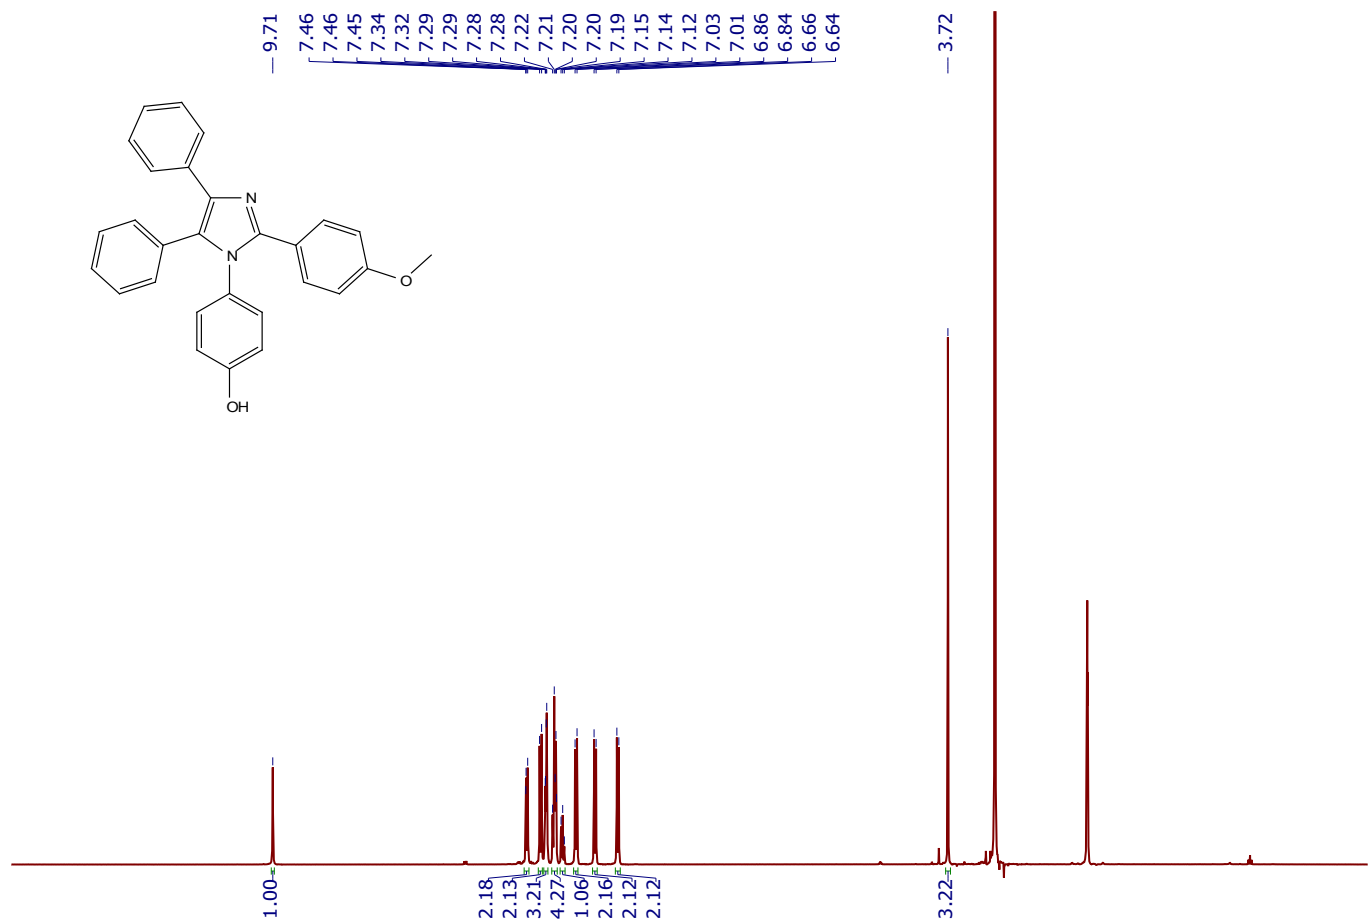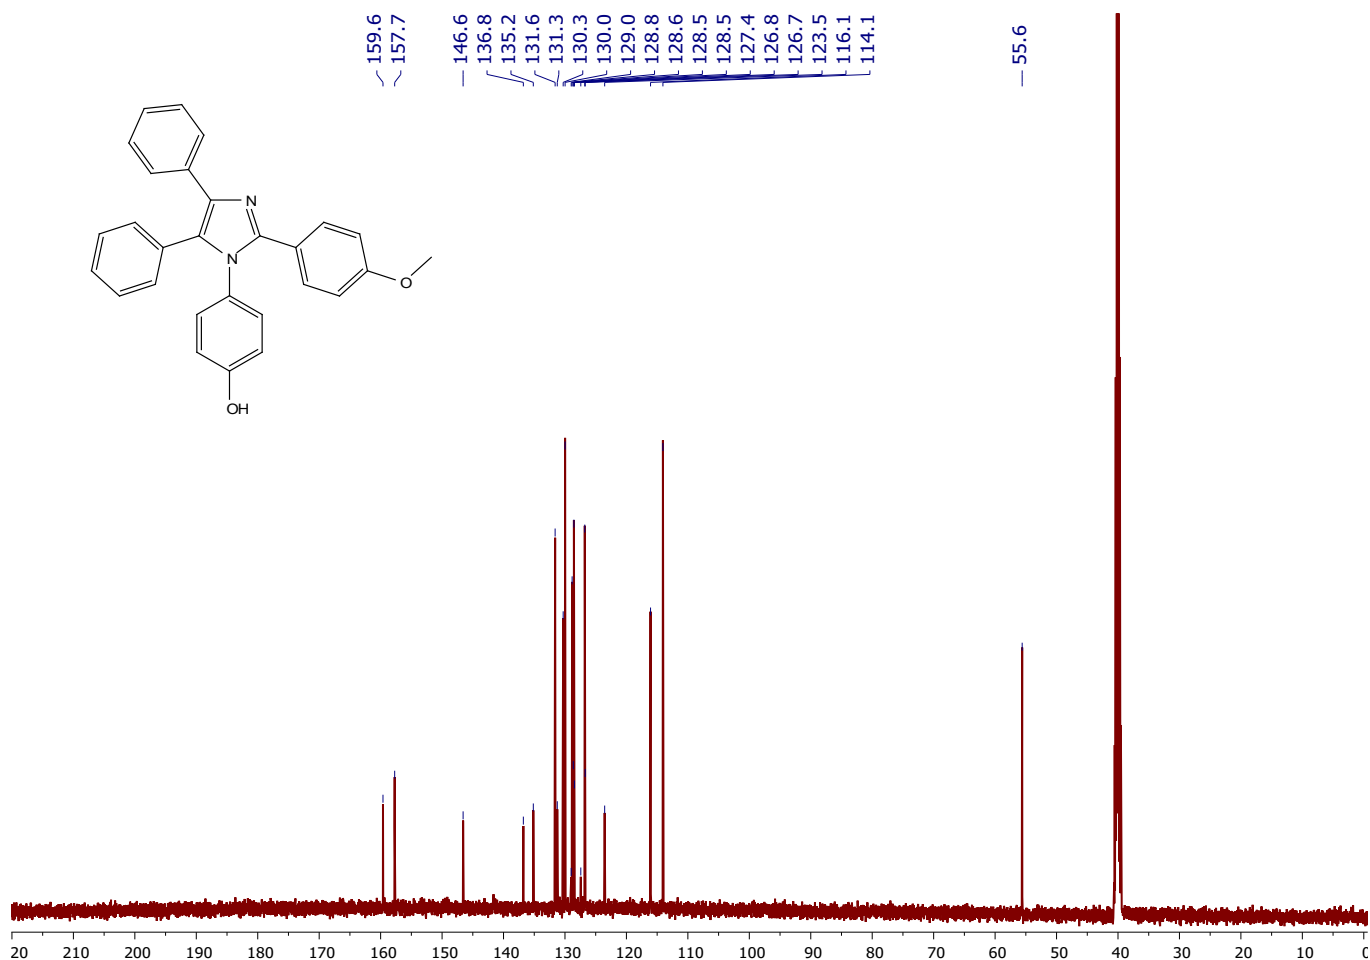

**<sup>1</sup>H, <sup>13</sup>C NMR spectrum of 1-(4-Hydroxyphenyl)-2-(4-(dimethylamino)phenyl)-4,5-diphenyl-1H-imidazole (IMI-20)**

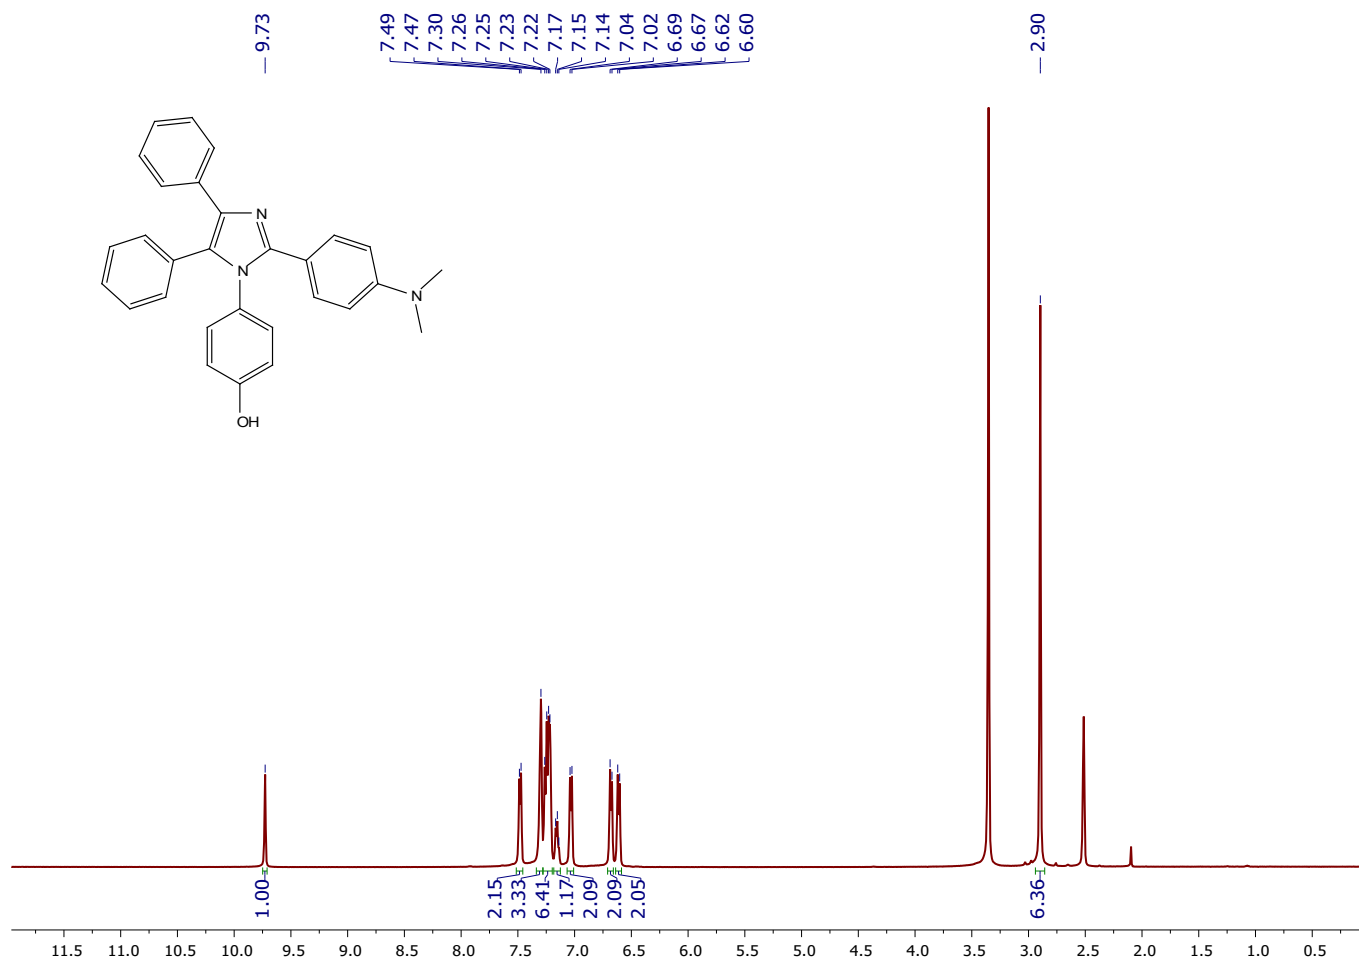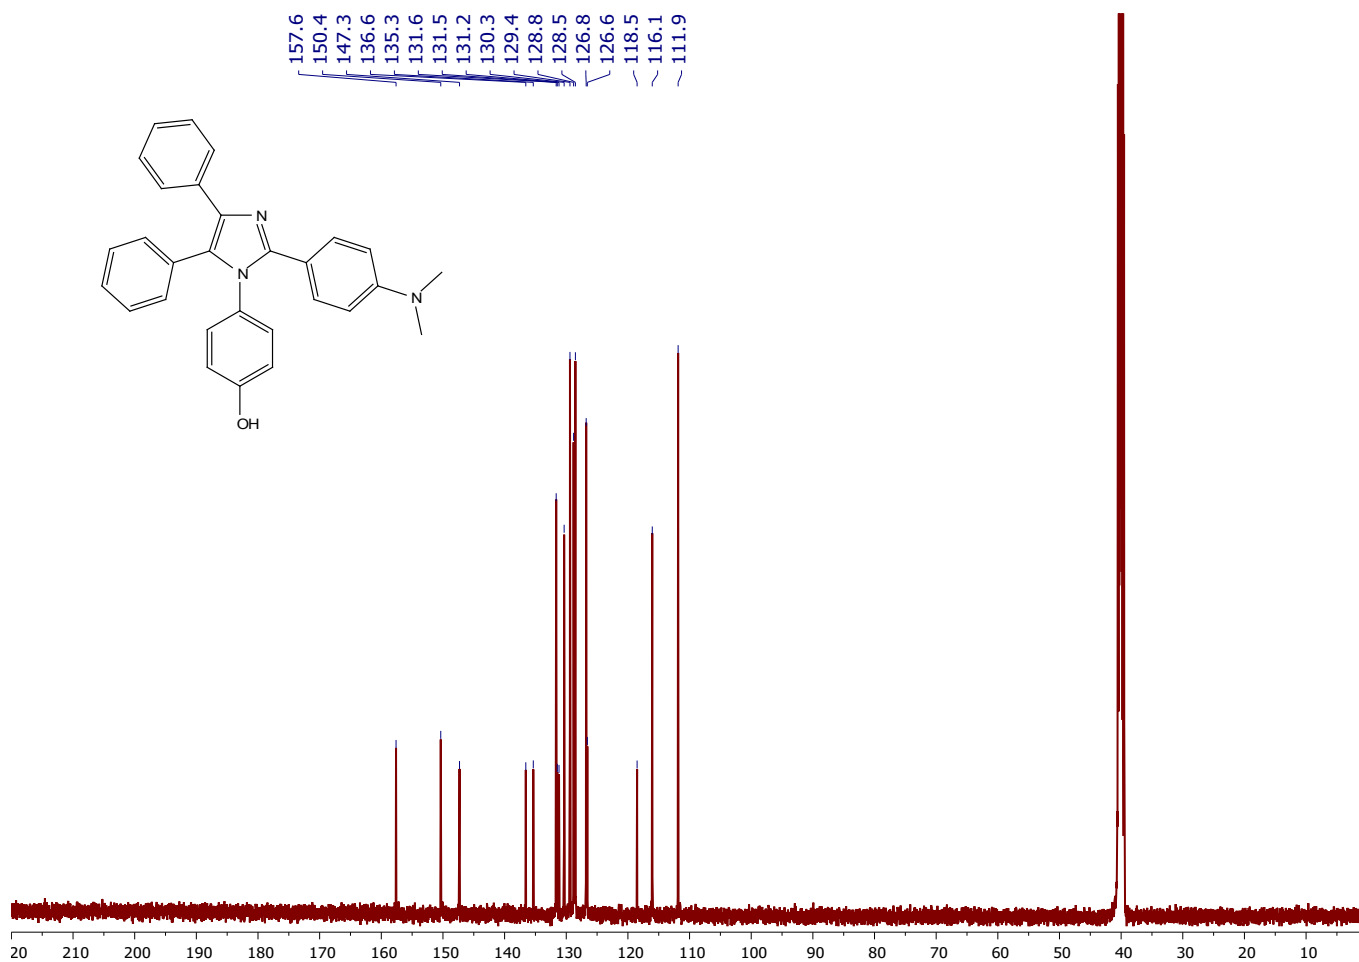

**<sup>1</sup>H, <sup>13</sup>C NMR spectrum and HRMS of 2-Cyclohexyl-1-(4-hydroxyphenyl)-4,5-triphenyl-1H-imidazole (IMI-21)**

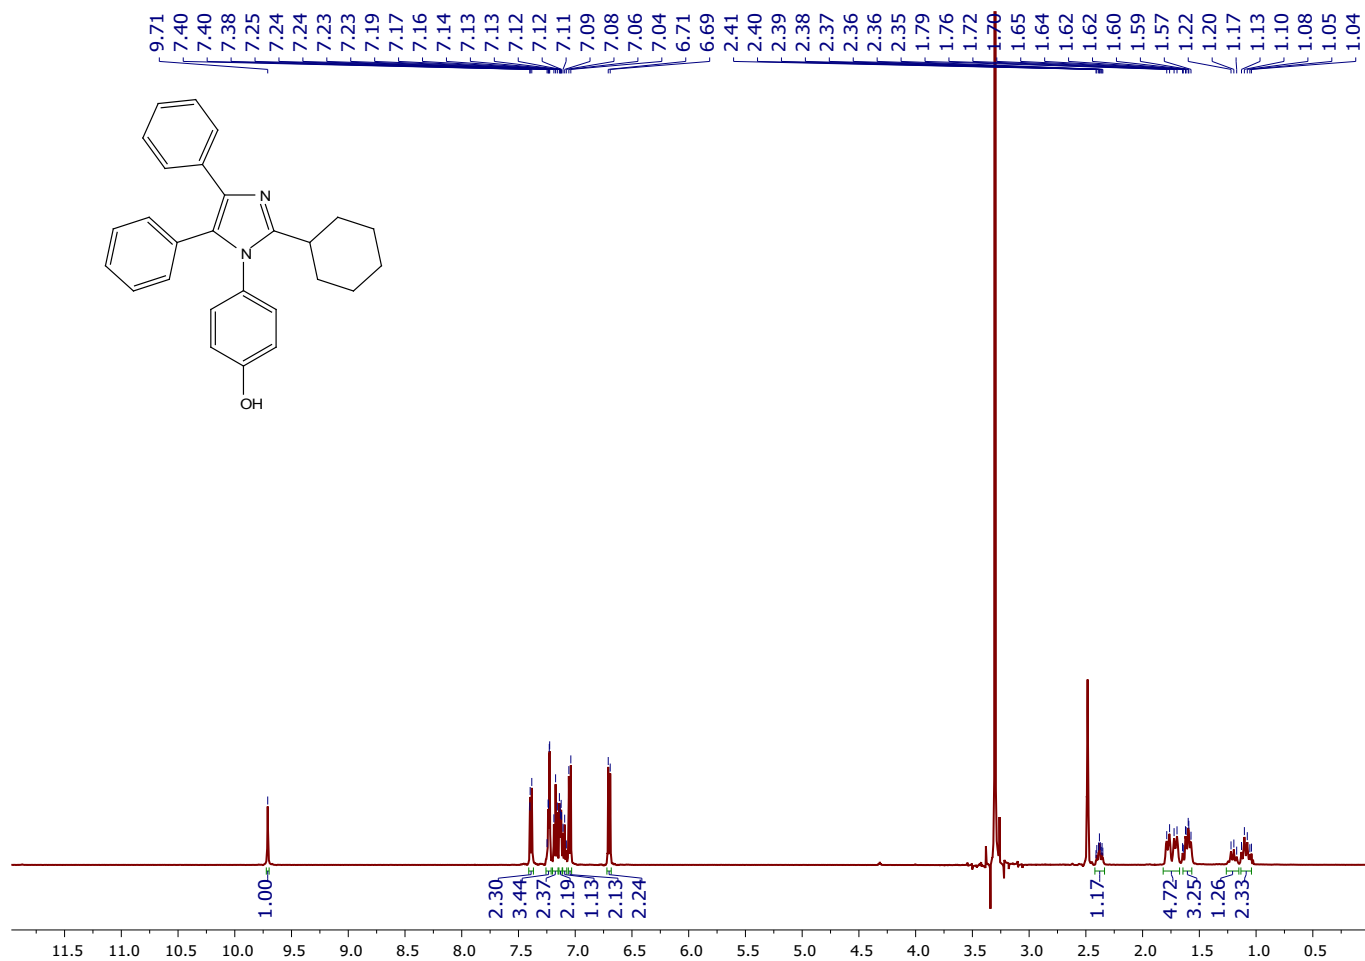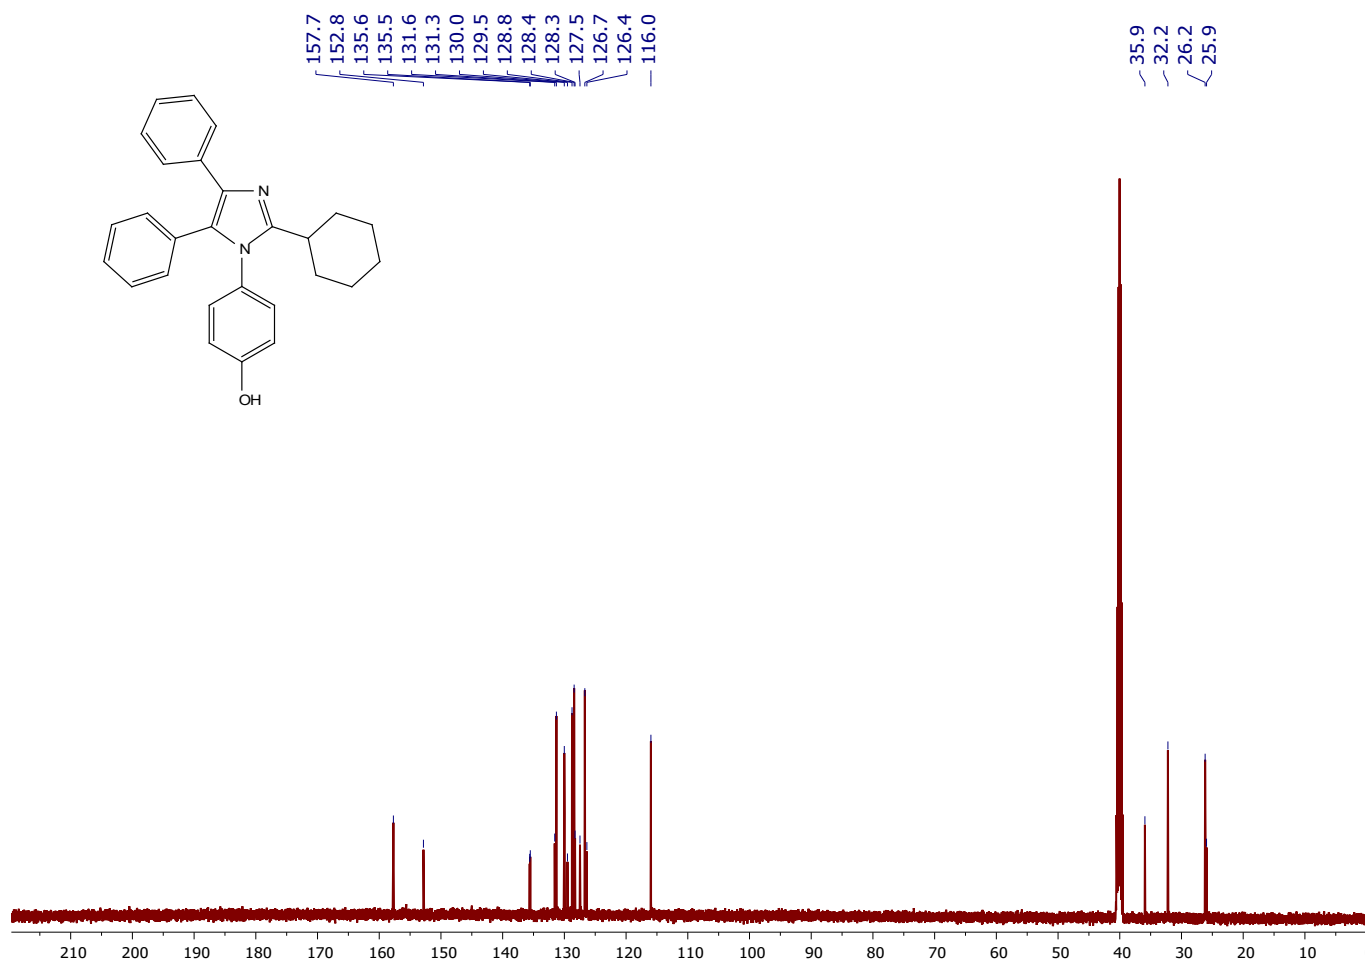

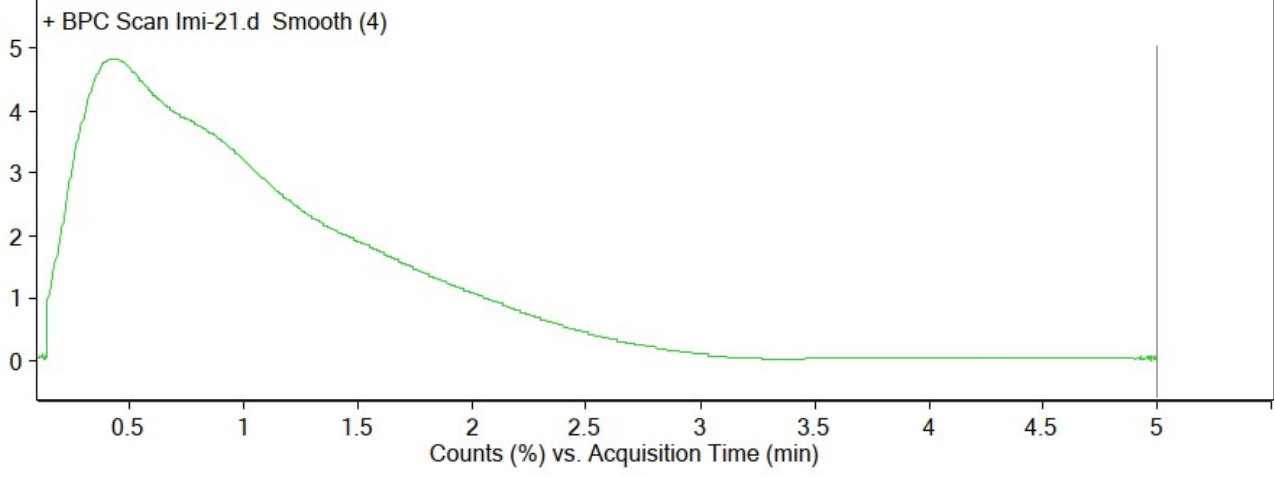

User Spectra

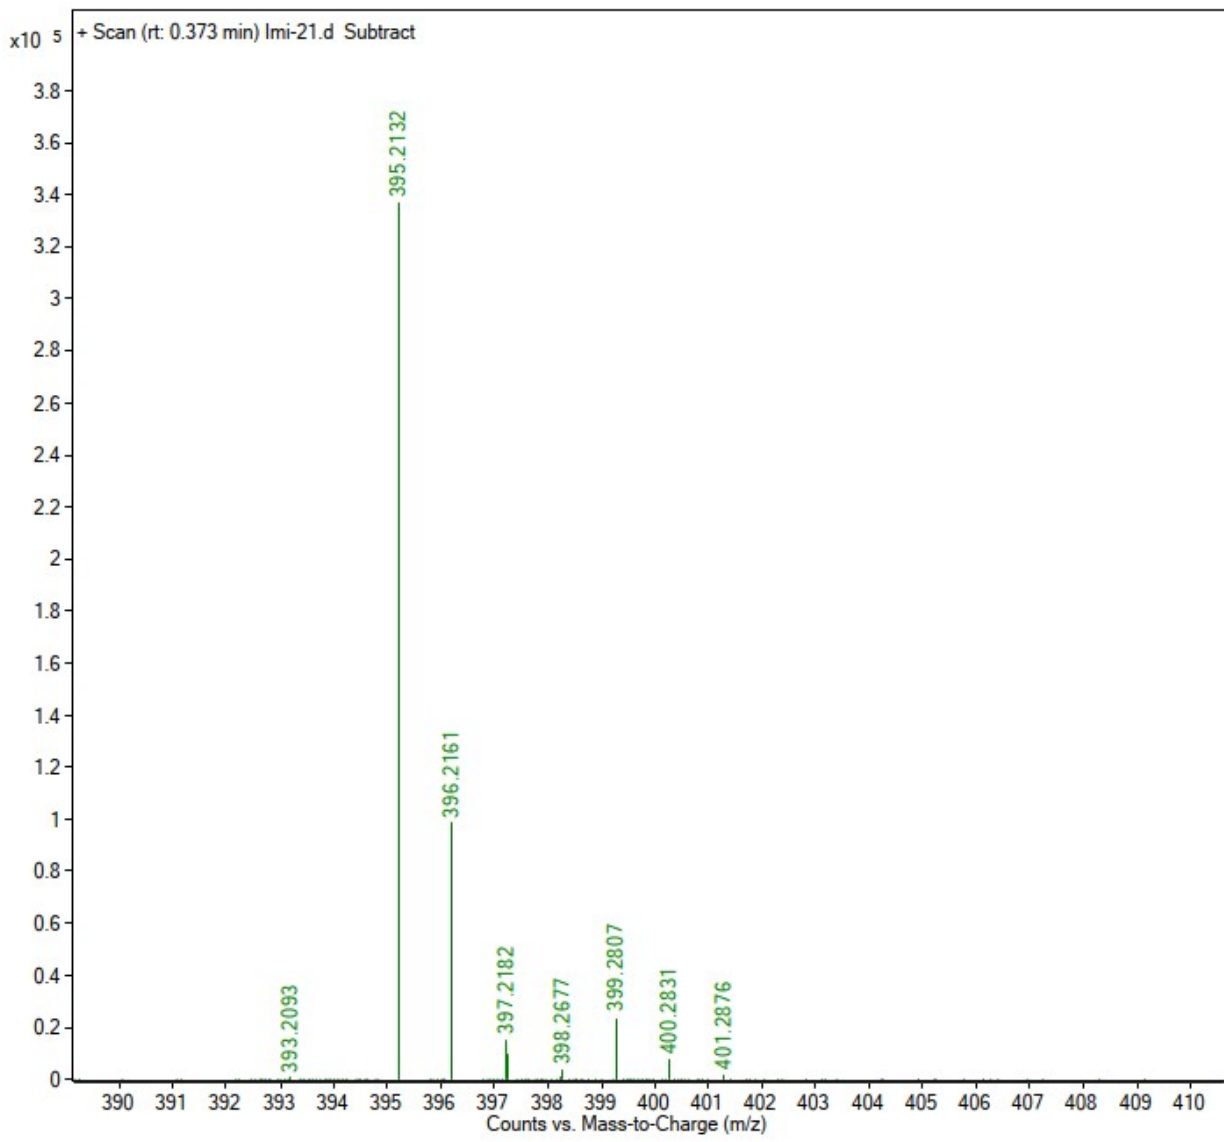

## Section S6. References

1. S. U. Bhat, R. A. Naikoo and R. Tomar, *J Int. Res. J. Pure Appl. Chem*, 2016, **11**, 1-10.
2. A. Teimouri and A. N. Chermahini, *J Mol Catal A Chem.*, 2011, **346**, 39-45.
3. J. Safari and Z. Zarnegar, *C R Chim.*, 2013, **16**, 920-928.
4. B. Das, J. Kashanna, R. A. Kumar and P. Jangili, *Monatshefte für Chemie - Chemical Monthly*, 2013, **144**, 223-226.
5. M. P. Nadamani, N. O. Mahmoodi, M. Mamaghani, M. A. Zanjanchi and H. T. Nahzomi, *ChemistrySelect*, 2019, **4**, 8470-8476.
6. S. Samai, G. C. Nandi, P. Singh and M. S. Singh, *Tetrahedron*, 2009, **65**, 10155-10161.
7. A. R. Moosavi-Zare, Z. Asgari, A. Zare, M. A. Zolfigol and M. Shekouhy, *RSC Adv.*, 2014, **4**, 60636-60639.
8. J. Safari, S. Gandomi-Ravandi and Z. Akbari, *J. Adv. Res.*, 2013, **4**, 509-514.
9. K. Sivakumar, A. Kathirvel and A. Lalitha, *Tetrahedron Letters*, 2010, **51**, 3018-3021.
10. H. V. K. Nagaraja Naik, J. Rangaswamy, S.T. Harinia and T.C. Umeshkumar, *J. Appl. Pharm. Sci.*, 2012, **2**, 67-74.
11. K. D. Safa, A. Feyzi, M. Allahvirdinesbat, L. Sarchami and P. N. Panahi, *Synth. Commun.*, 2015, **45**, 382-390.
12. K. D. Safa and H. Mousazadeh, *Synth. Commun.*, 2016, **46**, 1595-1604.
13. H. V. K. Nagaraja Naika, J. Rangaswamy, S.T. Harinia and T. C. Umeshkumara, *Three component one pot synthesis of 5-Substituted 1-Aryl-2,3-diphenyl imidazoles: A novel class of promising antioxidants %J Journal of Applied Pharmaceutical Science*, issue: 11.
14. G. Sharma, A. Sain, N. Kumar and D. Pathak, *Indian J. Heterocycl. Chem.*, 2010, **19**, 311-312.
15. K. D. Safa, M. Allahvirdinesbat, H. Namazi and P. N. Panahi, *Comptes Rendus Chimie*, 2015, **18**, 883-890.
16. K. D. Safa, L. Sarchami, M. Allahvirdinesbat, A. Feyzi and P. N. Panahi, *Journal of Chemical Research*, 2014, **38**, 571-576.
17. N. Naik, *Journal of Applied Pharmaceutical Science*, 2012, DOI: 10.7324/JAPS.2012.21112.
18. Z. Ghasemi, A. Mirzaie, R. Arabzadeh, Z. Fathi and A. Abolghassemi Fakhree, *Journal of Chemical Research*, 2019, **43**, 262-267.
19. K. D. Safa, M. Allahvirdinesbat and H. Namazi, 2015, DOI: 10.6084/m9.figshare.1311742.v4.
